# Supplementary material
Source: ML conference proceedings conference paper supplement (https://proceedings.mlr.press/v139/miller21a.html)
Supplement: Supplementary file 3 [file miller21a-supp.zip]

Archive with 32 entries (29 files):
- supp/
- __MACOSX/._supp
- supp/.DS_Store
- __MACOSX/supp/._.DS_Store
- supp/optimizing_PR_icml.pdf
- __MACOSX/supp/._optimizing_PR_icml.pdf
- supp/code/
- __MACOSX/supp/._code
- supp/kaggle_data/
- __MACOSX/supp/._kaggle_data
- supp/code/algorithms.py
- __MACOSX/supp/code/._algorithms.py
- supp/code/data_generation.py
- __MACOSX/supp/code/._data_generation.py
- supp/code/linear_model.ipynb
- __MACOSX/supp/code/._linear_model.ipynb
- supp/code/data_prep.py
- __MACOSX/supp/code/._data_prep.py
- supp/code/strategic.py
- __MACOSX/supp/code/._strategic.py
- supp/code/logistic_regression.py
- __MACOSX/supp/code/._logistic_regression.py
- supp/code/simulator_experiments.ipynb
- __MACOSX/supp/code/._simulator_experiments.ipynb
- supp/kaggle_data/sampleEntry.csv
- __MACOSX/supp/kaggle_data/._sampleEntry.csv
- supp/kaggle_data/cs-test.csv
- __MACOSX/supp/kaggle_data/._cs-test.csv
- supp/kaggle_data/Data Dictionary.xls
- __MACOSX/supp/kaggle_data/._Data Dictionary.xls
- supp/kaggle_data/cs-training.csv
- __MACOSX/supp/kaggle_data/._cs-training.csv
