# Supplementary material
Source: ML conference proceedings conference paper supplement (https://proceedings.mlr.press/v139/miller21a.html)
Supplement: Supplementary file 3 [file miller21a-supp.zip › supp/kaggle_data/cs-test.csv]

	SeriousDlqin2yrs	RevolvingUtilizationOfUnsecuredLines	age	NumberOfTime30-59DaysPastDueNotWorse	DebtRatio	MonthlyIncome	NumberOfOpenCreditLinesAndLoans	NumberOfTimes90DaysLate	NumberRealEstateLoansOrLines	NumberOfTime60-89DaysPastDueNotWorse	NumberOfDependents
1		0.88551908	43	0	0.177512717	5700	4	0	0	0	0
2		0.463295269	57	0	0.527236928	9141	15	0	4	0	2
3		0.043275036	59	0	0.687647522	5083	12	0	1	0	2
4		0.280308229	38	1	0.925960637	3200	7	0	2	0	0
5		0.9999999	27	0	0.019917227	3865	4	0	0	0	1
6		0.509791452	63	0	0.342429365	4140	4	0	0	0	1
7		0.587778161	50	0	1048	0	5	0	0	0	3
8		0.046148938	79	1	0.3691702	3301	8	0	1	0	1
9		0.013527027	68	0	2024	NA	4	0	1	0	0
10		0.9999999	23	98	0	0	0	98	0	98	0
11		0.0284849	37	0	0.319686529	7400	8	0	1	0	1
12		0.085076597	52	0	0.903552105	4250	6	0	2	0	0
13		0.010596142	68	0	0.007782101	3854	16	0	0	0	0
14		0.380678869	30	0	0.37744902	2500	12	0	0	0	1
15		0.556893515	56	0	0.697347208	6822	14	0	1	0	1
16		0.079055723	28	0	0.105831231	7133	8	0	0	0	0
17		0.543013445	72	0	0.461786138	5900	10	0	2	0	1
18		0.11234564	37	0	0.144326363	2916	7	0	0	0	0
19		0.648285056	29	0	0.174850033	4500	4	0	0	1	1
20		0.686406344	43	0	487	NA	10	0	0	0	1
21		0.085909749	48	0	0.19615602	8844	8	0	1	0	1
22		0.158548716	61	0	0.353158292	11920	13	0	1	0	0
23		0.009303162	69	0	0.384451019	6083	4	0	2	0	0
24		0.95744175	69	2	0.666337936	3041	8	1	1	1	1
25		0.442489363	50	1	0.286554523	8500	17	0	1	0	2
26		0.125267033	51	0	3825	NA	10	0	2	0	0
27		0.9999999	45	0	0	4750	1	0	0	0	1
28		0.181480656	67	0	1509	NA	12	0	1	0	0
29		0.729396906	34	0	0.335555259	7500	6	0	2	0	1
30		0.024445377	47	0	5810	NA	20	0	2	0	2
31		0.691411308	44	0	0.173777315	4804	10	0	0	0	0
32		0	55	0	2007	NA	5	0	1	0	0
33		0	57	0	0.212446888	4000	12	0	0	0	0
34		0.817480149	54	0	0.13272101	4354	6	0	0	0	0
35		1.008266866	61	4	0.261173013	8166	14	0	1	0	1
36		0.423358479	49	0	0.616301423	2600	13	0	1	0	1
37		0.282515024	32	0	0.49290142	5000	10	0	1	0	1
38		0.14212674	56	0	4009	NA	9	0	2	0	2
39		0.022738142	41	0	0.343160782	5833	5	0	1	0	3
40		0.005893211	57	1	0.386379019	11819	25	0	4	0	1
41		0.603509659	47	0	1.009598604	4583	21	0	12	0	3
42		0.715499066	40	2	0.642835504	3300	12	0	2	0	0
43		0.640013926	46	0	0.854994215	2592	13	0	1	0	0
44		0.025266165	60	0	0.348583548	6600	8	0	2	0	0
45		0.19088468	67	1	2.994208494	1035	23	0	1	0	0
46		0.003449175	79	0	5	NA	4	0	0	0	0
47		0.013049348	80	0	7	NA	2	0	0	0	NA
48		0.222960536	56	0	0.457949309	10415	12	0	2	0	3
49		0.019542164	41	0	0.189562088	5000	15	0	0	0	0
50		0.524461145	56	0	0.412297893	8163	9	0	2	0	3
51		0.083716694	52	0	0.105468338	9490	18	0	0	0	0
52		0.12714116	87	0	0.135945622	2500	14	0	0	0	0
53		0.004229082	45	0	0.282128747	8605	5	0	2	0	1
54		0.9999999	48	0	0.29995905	4883	4	0	2	0	0
55		0.09828419	36	0	0.375484586	5416	13	0	1	0	0
56		0.553245935	47	1	0.3496557	6534	8	0	1	0	1
57		0.113111018	69	0	0.037392521	5000	4	0	0	0	1
58		0.623466258	29	1	0.007997715	3500	6	0	0	0	0
59		0.586821108	59	1	0.323968393	3416	7	0	0	0	0
60		0.473293345	36	1	0.475249939	4100	6	0	1	0	3
61		0.404983801	63	0	0.023952352	46675	6	0	0	0	1
62		0.042376836	48	0	0.291894162	16666	8	0	2	0	0
63		0	32	0	0.440890919	1750	7	0	1	0	0
64		0.008699783	63	0	0.6961013	3000	6	0	1	0	0
65		0.017808676	46	0	0.748034754	2416	6	0	2	0	0
66		0.128594901	74	0	0.795734755	3000	22	0	2	0	0
67		0.057245192	44	0	0.402049829	12000	9	0	2	0	0
68		0.9999999	36	0	0.00239952	5000	0	0	0	0	0
69		0.060830479	60	0	0.27274191	6210	8	0	1	0	0
70		0.9999999	52	98	0.020302695	2708	0	98	0	98	0
71		0.304505013	53	0	1909	NA	8	0	1	0	0
72		1.007999	31	0	0.12593588	5208	3	0	0	0	0
73		0.205385796	71	0	0.167160055	10133	8	0	1	0	0
74		0.9999999	34	1	0.322838581	2000	3	0	0	0	0
75		0.146739206	45	0	0.186481352	10000	10	0	1	0	2
76		0.789460527	60	0	0.174165795	8600	6	0	1	0	0
77		0.461022124	49	0	1.02429402	4815	15	0	1	0	2
78		0.178906103	40	0	0.830723092	3000	13	0	2	0	1
79		0	62	0	3764	NA	14	0	3	0	0
80		0.04553706	38	0	0.421822272	8000	10	0	2	0	4
81		0.085647252	47	0	577	NA	9	0	0	0	NA
82		0.179955135	50	0	0.273643863	12000	9	0	1	0	0
83		0	25	0	0.358946213	1821	7	0	0	0	0
84		0.076354096	80	0	0.095634096	7695	13	0	0	0	0
85		0.274073057	48	0	0.224086484	20442	10	0	2	0	5
86		0	49	0	0.481076863	5125	6	0	2	0	0
87		0.670106417	22	0	0.172031077	900	3	0	0	0	0
88		0	45	0	743	NA	8	0	1	0	0
89		0.2484951	26	0	0.22406639	2650	7	0	0	0	0
90		0.121839737	25	0	0.712418301	764	6	0	0	0	0
91		0.471882029	33	0	0.009030801	6200	1	0	0	0	2
92		0.127925892	51	0	0.25369501	5750	11	0	1	0	3
93		0.017074014	49	0	0.333349593	20500	10	0	2	0	2
94		0.217222445	55	0	0.349096501	2600	4	0	1	0	1
95		0.002333278	61	0	0.081550486	12666	8	0	2	0	1
96		0.005574991	68	1	3.014804416	15670	32	0	21	0	0
97		0.425852948	57	0	0.421084912	14673	16	0	2	0	1
98		0.633435124	44	0	0.702283105	6569	13	0	1	0	3
99		0.010456209	51	0	0.0121673	2629	7	0	0	0	0
100		0.003817835	28	0	0.139479905	3383	6	0	0	0	0
101		0.784202555	48	0	0.255395683	5837	6	0	0	0	0
102		0.743010708	42	0	0.644246501	5500	8	0	2	0	2
103		0.065279751	63	0	1227	NA	10	0	1	0	0
104		0.726230416	42	0	0.511542364	7883	8	0	1	0	2
105		0.00188723	37	1	2705	NA	15	0	3	0	0
106		0.179196308	25	0	0.020753267	1300	3	0	0	0	0
107		0.691711851	42	2	0.317501361	7347	10	1	1	0	0
108		0.208787353	80	0	0.355753499	5500	11	0	2	0	1
109		0.008226938	58	0	0.17470617	8167	13	0	1	0	0
110		0.143404799	47	0	0.342215519	5966	11	0	2	0	0
111		0.178282566	54	0	6971	NA	17	0	1	0	0
112		0.134259516	32	0	2335	NA	11	0	2	0	1
113		0.075396229	39	0	0.720239975	3166	10	0	1	0	2
114		0.9999999	40	0	583	NA	2	1	0	1	1
115		0.9999999	33	0	0.058776489	2500	4	0	0	0	0
116		0.053565615	63	0	0.216343969	11000	15	0	2	0	0
117		0.007959951	64	0	1139	NA	4	0	1	0	0
118		0.9999999	31	0	0.200719712	2500	4	0	0	0	0
119		0	43	0	0.29008672	5880	8	0	2	0	0
120		0.011298743	60	0	0.202783777	4166	11	0	1	0	0
121		0.137670636	61	0	0.505499214	7000	7	0	2	0	1
122		0.067472315	56	1	0.625610482	8394	20	0	3	0	0
123		0.156938644	53	0	0.154980627	8000	5	0	1	0	5
124		2.182724252	49	0	497	NA	2	2	0	1	0
125		0.00441315	44	0	3092	NA	8	0	1	0	0
126		0.167302177	59	0	0.24471435	15560	31	0	2	0	1
127		0.009340957	93	0	0.002749313	4000	6	0	0	0	1
128		0.008623707	50	0	0.461307738	3333	10	0	2	0	0
129		0.061956607	62	0	2103	NA	6	0	2	0	0
130		0.276868925	37	0	0.672418752	6953	16	0	3	0	0
131		0.038497689	65	1	0.34064482	3783	19	0	1	0	0
132		0.839659145	42	0	0.43650047	7440	9	0	2	0	2
133		0.011208483	60	0	0.184545236	8333	6	0	0	0	0
134		6.06E-05	65	2	0.172082509	3538	8	0	0	0	0
135		0.176630241	67	0	0.940594059	100	9	1	0	0	0
136		0.081920615	80	0	0.291636186	4100	12	0	2	0	0
137		0.850404518	50	1	0.602526085	9104	13	0	3	0	0
138		0	50	1	0.501399888	12500	11	0	2	0	0
139		0.007930445	60	0	0.039027284	8429	11	0	1	0	0
140		0	34	0	0.227569657	7500	5	0	1	0	2
141		0.038033307	76	0	0.010418475	5758	7	0	0	0	0
142		0	59	0	0.536007293	3290	10	0	1	0	0
143		0.001519939	78	0	454	NA	3	0	0	0	0
144		0	37	0	0.14114202	3414	7	0	0	0	0
145		0.979429915	44	0	0.359285258	4700	9	1	0	0	2
146		0.016361653	31	0	0.116996384	4700	3	0	0	0	0
147		0.015773308	76	0	0.062423799	4100	5	0	0	0	1
148		0	54	2	0.606725146	2735	8	0	2	0	0
149		0.003749813	59	0	0.000879507	2273	4	0	0	0	0
150		0.48197391	56	0	0.606888251	10800	19	0	3	0	0
151		0.016171777	63	0	0.005020203	8166	4	0	0	0	0
152		0	35	0	0.112387868	23409	4	0	1	0	0
153		0.057502948	68	0	114	NA	9	0	0	0	0
154		0.286390906	58	0	1973	NA	9	0	1	0	0
155		0.006889335	54	0	0.656827454	4166	11	0	1	0	3
156		0	46	0	0.60406335	6250	13	0	1	0	4
157		0.247602204	51	1	0.421939349	8012	9	0	3	0	2
158		0.0050266	64	0	741	NA	11	0	1	0	0
159		1.082882132	49	0	2279	NA	6	0	2	0	1
160		0	44	0	0.635591102	4000	10	0	1	0	1
161		0.042934116	64	0	0.173961562	8064	6	0	1	0	0
162		0.000359993	50	0	0.795135792	12334	7	0	1	0	0
163		0.270135526	45	0	1334	NA	7	0	1	0	0
164		0.571639446	46	0	0.08411215	4279	2	0	0	0	3
165		0.015099748	54	0	0.008663779	3000	5	0	0	0	1
166		0.254112438	48	0	199	NA	3	0	0	0	0
167		49.92307692	62	1	1396	NA	6	2	0	1	0
168		0.278772123	33	0	2319	NA	7	0	2	0	0
169		0.925877622	66	3	0.332060302	4974	9	0	1	0	1
170		0	57	0	0.315624107	3500	7	0	1	0	0
171		0.009420475	77	0	0.002739726	6204	7	0	0	0	0
172		0	68	0	1.012993503	2000	14	0	1	0	1
173		0.032264648	39	0	0.446766348	5550	13	0	1	0	0
174		0.607622394	31	0	0.446745562	7773	7	0	1	0	0
175		0.10725053	49	0	0.605112154	5750	8	0	2	0	2
176		1.346613546	48	1	349	NA	4	0	0	0	0
177		0.18961061	53	0	0.34534712	3384	8	0	1	0	2
178		0.713289152	56	0	0.259185204	4000	22	0	0	0	1
179		0	59	0	0.426371575	15000	10	0	2	0	2
180		0.017215349	65	0	0.39656155	10527	11	0	3	0	0
181		0.013926305	32	1	0.314481577	3500	7	0	2	0	1
182		0.048730085	46	0	0.136486351	10000	2	0	1	0	1
183		0.240282572	49	0	0.064624776	9500	4	0	0	0	3
184		0.213174897	66	0	0.282042553	11749	17	0	2	0	0
185		0.924162806	55	0	0.772163712	7500	14	0	3	0	1
186		0.140642968	64	0	84	NA	1	0	0	0	0
187		0.033450084	51	0	0.064366954	8000	5	0	0	0	0
188		0.421034057	43	0	0.026646744	8030	2	0	0	0	0
189		0.9999999	49	0	0.041681511	14034	3	0	1	0	1
190		0.058515422	45	0	0.84083045	2600	13	0	1	0	1
191		0	53	0	0.14004914	2848	4	0	0	0	0
192		0.52726573	47	0	0.160789083	7400	5	0	0	0	3
193		0.148418119	53	0	0.278813064	15400	12	0	1	0	3
194		0.978675645	62	0	0.432150313	1436	2	0	0	0	0
195		0	41	0	0	3333	2	0	0	0	0
196		0.429597315	45	0	0.357663191	7000	10	0	1	0	2
197		0.20883009	72	0	1022	NA	6	0	0	0	0
198		0.002927332	64	0	0.276258206	5483	16	0	2	0	0
199		0.024887045	51	0	2384	NA	10	0	1	0	NA
200		0.029882946	73	0	0.038212816	1700	8	0	0	0	0
201		0.9999999	41	0	0.438083727	9100	5	0	2	0	4
202		0.394068341	77	0	0.197055081	5500	12	0	0	0	1
203		0.831942403	56	4	0.39885744	3850	21	0	0	0	0
204		0.809292223	72	0	0.474273675	9017	11	0	1	0	0
205		0.290154049	63	0	10564	NA	22	0	2	0	0
206		0.185407296	67	0	680	NA	5	0	1	0	0
207		0.053850845	42	0	2935	NA	19	0	1	0	3
208		0.003644731	66	0	1759	NA	7	0	2	0	1
209		0.732133933	35	0	0.500744048	2687	6	0	0	0	1
210		0.029643172	84	0	30	NA	6	0	0	0	0
211		0.9999999	24	0	0	4223	0	0	0	0	0
212		0.36993884	39	0	0.373256945	9250	6	0	2	0	2
213		0.10742322	57	0	0.146658782	1690	10	0	0	0	0
214		0.064430288	58	0	0.167408554	5166	3	0	1	0	2
215		0.275772423	33	0	880	NA	4	0	1	0	0
216		0.958208358	36	0	0.227831431	4555	4	0	1	0	1
217		0.034044379	59	0	0.170060998	30000	14	0	2	0	1
218		0.626668121	46	1	0.240697824	15533	11	0	2	0	1
219		0.216438432	54	0	0.271155693	9370	9	0	2	0	1
220		0.033747591	75	0	0.015472507	4200	3	0	0	0	1
221		0.021689777	37	0	0.367581366	4700	11	0	2	0	0
222		0.020755209	64	0	0.281244231	10833	18	0	2	0	1
223		0.14958287	54	0	0.122575485	5000	4	0	0	0	0
224		0.145354186	52	0	2232	NA	7	0	1	0	0
225		0.022265829	58	0	0.226433961	11000	15	0	2	0	1
226		0.814895526	32	0	0.08496732	5966	7	0	0	0	2
227		0.017541359	48	0	0.318359658	6900	11	0	1	0	0
228		0.997334222	57	0	0.06231109	4300	2	0	0	0	0
229		0.732402711	51	0	4.190899001	900	12	0	1	0	2
230		0.9999999	48	2	0	4955	0	1	0	0	4
231		0.759181385	27	2	0.551020408	440	4	0	0	0	0
232		0.134548672	63	0	0.367797134	9700	13	0	2	0	0
233		0.206049738	63	0	0.2826448	9633	13	0	1	0	0
234		0.2038457	61	0	0.140904925	12000	10	0	0	0	0
235		0.000849958	74	0	1708	NA	6	0	2	0	0
236		0.180450699	44	1	858	NA	11	1	1	0	0
237		1.098820771	76	0	789	0	3	0	0	0	0
238		0.026848658	82	0	16	NA	5	0	0	0	0
239		0	27	0	0	NA	2	0	0	0	NA
240		0.195904924	50	0	0.368877748	5185	6	0	2	0	2
241		0.9999999	52	0	0.142409782	6705	3	0	1	0	2
242		0.125989673	58	0	0.028969957	1863	5	0	0	0	0
243		0.014449134	63	0	0.166261963	7000	9	0	1	0	2
244		0.428587127	60	0	0.385600351	13666	11	0	2	0	1
245		0.883238361	31	0	0.305908513	3147	3	0	0	0	0
246		0.10892571	76	0	0.34344276	6000	19	0	2	0	0
247		0.205646242	40	0	0.631188119	3635	16	0	2	0	0
248		0.031861159	72	0	2117	NA	12	0	1	0	1
249		0.000257085	53	0	19	NA	19	0	0	0	0
250		0.915307733	43	0	0.110864252	4500	6	1	0	0	2
251		0.9999999	66	0	0	NA	2	0	0	0	NA
252		0.618874773	30	0	0.024268824	1606	1	0	0	1	0
253		0.007645376	57	0	1212	NA	8	0	1	0	0
254		0.684093698	33	0	0.439461883	8250	15	0	1	0	0
255		0.001399907	89	0	0	NA	1	0	0	0	0
256		0	50	0	1199	NA	8	0	1	0	0
257		0.417083304	46	0	0.503651539	3833	3	0	1	0	3
258		0.9999999	53	1	0	NA	1	0	0	0	3
259		0.00917726	58	1	0.409808269	23000	16	0	4	0	0
260		0.849782107	27	0	0.024883359	4500	3	0	0	0	4
261		0.011324018	39	0	0.162878788	9503	13	0	1	0	1
262		0.286831101	47	0	0.293654697	4065	8	0	1	0	2
263		0	72	0	0.010570422	10500	4	0	0	0	0
264		0.506957355	32	0	0.075554339	3652	10	0	0	0	0
265		0.898982993	50	0	0.267183204	4000	7	0	0	0	0
266		0.034998214	46	0	0.544982007	2500	10	0	1	0	1
267		0.340200948	48	1	0.374906273	4000	10	0	2	0	2
268		0.327713637	36	0	0.789536837	4166	10	0	1	0	0
269		0.720891481	45	0	0.051474263	2000	3	0	0	1	2
270		0.081345933	60	0	0.277953674	6000	5	0	1	0	0
271		0.617271677	70	0	0.381930366	11344	11	0	2	0	1
272		0.348685811	33	0	0.320965209	12100	21	0	2	0	0
273		0.027632517	71	0	68	NA	10	0	0	0	0
274		0.017548637	58	0	0.148234201	4303	17	0	0	0	0
275		0.008856806	75	0	0.407658598	9583	13	0	2	0	1
276		0.337493001	41	0	0.196317749	4833	6	0	1	0	0
277		0.457509237	73	0	1200	NA	5	0	1	0	0
278		0.083144299	57	0	0.172501967	5083	4	0	1	0	2
279		0.947670009	46	0	0.494860499	8852	8	0	2	0	0
280		0.366597647	31	0	0.058125583	7500	4	0	0	0	0
281		1.066445183	35	1	0.165933627	2500	2	3	0	0	4
282		0.34019244	57	1	0.158244836	8568	6	0	1	0	0
283		0.483634515	48	0	0.567567568	6400	14	0	2	0	4
284		0.172365527	66	0	25	NA	1	0	0	0	0
285		0.034699306	60	0	0.073642119	3000	8	0	0	0	0
286		0.052308174	40	0	1664	NA	7	0	1	0	0
287		0.041379116	34	0	0.208582141	7200	6	0	0	0	2
288		0.089709159	43	1	0.402213038	7500	11	0	1	0	0
289		0.9999999	57	0	0.326965793	2250	4	0	0	0	2
290		0.905861456	51	0	0.075358166	3489	4	0	0	0	0
291		0.575369852	24	2	0.089415798	7000	3	0	0	1	1
292		0	80	0	0.214575613	5666	2	0	1	0	0
293		0.368631369	39	0	0.127643214	2600	3	0	0	0	2
294		0.131280805	48	0	0.108642776	12333	10	0	1	0	2
295		0.006832644	82	0	0.002056908	2916	4	0	0	0	0
296		0.243358555	41	0	0.121696035	1815	3	0	0	0	2
297		0	63	0	0.084589748	6300	12	0	0	0	0
298		0.359217365	56	0	0.605514316	6600	12	0	1	0	0
299		0.069993637	72	0	1214	NA	7	0	1	0	0
300		0.071973808	71	0	0.17888965	2917	5	0	0	0	0
301		0.466309231	48	1	0.041061192	7500	4	0	0	0	2
302		0.029682648	61	0	0.234221262	4166	11	0	1	0	0
303		0.186173338	69	0	0.370450364	12500	9	0	2	0	0
304		0.105375623	61	0	0.021236073	10500	13	0	0	0	0
305		0.9999999	41	1	0.640543782	2500	2	1	1	0	0
306		0.006284729	70	1	0.653194263	2300	17	0	1	0	0
307		0.027004649	95	0	14	NA	3	0	0	0	0
308		0.9999999	22	98	0	0	0	98	0	98	0
309		0.969540805	46	2	0.405956752	2450	6	0	0	0	3
310		0.028436231	36	0	0.341331734	5000	8	0	1	0	0
311		0.763109569	27	1	0.257288292	2160	2	2	0	0	0
312		0.028928627	39	0	0.084468146	10500	23	0	1	0	0
313		0.9999999	43	2	0.514240971	10216	4	0	4	0	0
314		0.578236848	52	0	0.16960949	29166	13	0	2	0	1
315		0.533066705	33	0	0.094577554	5550	2	0	0	0	1
316		0.9999999	40	0	0.671442852	3000	3	0	1	0	1
317		0.220881416	46	4	0.157137145	2500	10	0	0	1	0
318		0.042667341	63	0	0.401323955	4833	6	0	1	0	1
319		0.014986314	60	0	8375	NA	12	0	2	0	0
320		0.984414671	49	0	0.504740562	5800	9	0	1	0	1
321		0.75249501	21	0	11	NA	1	0	0	0	NA
322		0.036814114	51	0	0.582604349	4000	8	0	2	0	0
323		0.044292743	51	0	0.361773038	6000	7	0	1	0	3
324		0.009377361	48	0	0.235357335	5582	5	0	2	0	3
325		0.733149559	36	0	957	0	10	0	0	0	2
326		0.063021363	72	0	0.398981942	8250	12	0	2	0	0
327		0	71	0	0.495450455	10000	14	0	3	0	0
328		0.069146543	67	0	0.466766617	2000	5	0	0	0	0
329		0.067496875	31	0	0.417817226	6083	12	0	1	0	0
330		0.013049348	64	0	7	NA	1	0	0	0	NA
331		0.01603393	33	0	0.290044494	3595	9	0	1	0	0
332		0.045243305	52	0	0.391944008	7000	18	0	1	0	2
333		0.002370312	42	0	0.341711809	4614	6	0	1	0	2
334		0.561758201	60	0	0.279902512	5333	8	0	1	0	0
335		0.210749097	73	1	0.225358423	2231	7	0	1	0	0
336		0.550656844	51	0	0.532282025	8750	10	0	2	0	2
337		0.086702549	33	0	0.05341331	3500	4	0	0	0	0
338		0.9999999	54	0	0	3326	2	0	0	1	0
339		0.022412853	44	0	4343	NA	24	0	3	0	0
340		0.001999818	32	0	0.070074394	4166	3	0	0	0	0
341		0.019960001	66	0	0.21327076	7670	5	0	1	0	0
342		0.156882983	57	0	0.008569388	4200	4	0	0	0	0
343		0.148683359	46	0	0.399697111	8583	8	0	2	0	3
344		0.516859326	54	0	0.07016906	5500	7	0	0	0	0
345		0.372862731	75	0	439	NA	6	0	0	0	0
346		0.260367064	63	0	0.287097782	3200	20	0	1	0	0
347		0.623240462	35	0	591	NA	3	2	0	0	5
348		0	38	0	0.674038348	8500	17	0	8	0	0
349		0.198085475	45	0	0.320949029	7670	10	0	2	0	0
350		0.044441358	47	0	2187	NA	7	0	1	0	0
351		0.052996146	79	2	0.358591445	5423	16	0	1	0	0
352		0.30282705	44	0	0.249783174	19600	12	0	5	0	0
353		0.012453979	70	0	0.110111236	8000	5	0	1	0	1
354		0.829486505	49	0	1.134385201	1837	11	0	2	0	1
355		0.020416935	52	0	0.006130168	7666	8	0	0	0	2
356		0.020093645	63	0	0.003086039	8100	3	0	0	0	1
357		0.978912979	28	2	675	NA	7	1	0	2	0
358		0.030139212	76	0	0.015484515	2001	5	0	0	0	0
359		0.8850046	65	0	5589	NA	6	0	2	0	0
360		0.9999999	54	1	0.113884007	2844	0	0	0	0	0
361		0.291033485	41	0	2003	NA	10	0	1	0	0
362		0.061433893	40	0	0.304659014	7404	3	0	2	0	0
363		0.008727786	59	0	0.150012186	8205	7	0	1	0	1
364		0.09229527	40	0	0.349328215	4167	9	0	1	0	0
365		0.9999999	21	1	0	NA	0	0	0	0	NA
366		0.571149231	32	1	0.136551286	3148	4	0	0	0	0
367		0.379727441	34	0	818	0	7	0	0	0	2
368		0.812164229	57	0	0.538064226	4452	12	0	1	0	0
369		0.149952223	71	0	0.741350446	3583	4	0	2	0	0
370		1.239600666	46	0	0.0048	7499	2	1	0	0	2
371		0	51	0	0	4580	4	0	0	0	0
372		0.482468532	41	1	0.367657318	14333	15	0	2	0	0
373		0	58	0	0.103392569	3713	5	0	0	0	1
374		0.038477719	55	0	0.419938139	4202	6	0	2	0	2
375		0	54	0	0.229685621	5820	4	0	1	0	0
376		0.017196637	86	0	0.076584683	5000	3	0	0	0	0
377		0.181763647	40	0	0.125408052	3675	2	0	0	0	4
378		0	61	0	0.1585293	18412	8	0	1	0	1
379		0.119052027	52	0	0.131024634	2800	2	0	0	0	0
380		0.069850462	52	0	0.50879567	2216	12	0	1	0	0
381		0.001145609	45	0	0.250499857	3500	5	0	1	0	0
382		0.255032004	66	0	0.303727715	3084	17	0	1	0	0
383		0.802081827	70	0	0.266336683	20000	12	0	0	0	0
384		0.045797503	57	3	2833	NA	14	0	1	0	0
385		0	71	0	0.307448759	6000	7	0	2	0	0
386		0.010512551	66	0	0.14345747	6900	8	0	2	0	2
387		0.031498425	64	0	0.170848105	7333	4	0	1	0	0
388		0	42	0	0.168567411	6400	2	0	1	0	2
389		0.267994991	65	0	0.647454453	11745	13	0	3	0	0
390		0.180200825	54	0	0.098465766	8733	4	0	0	0	0
391		0.031704017	72	0	0.091402456	3500	4	0	1	0	1
392		0.020665978	56	0	0.20319393	11333	9	0	1	0	0
393		0.147607449	77	0	0.659811482	3500	11	0	2	0	0
394		0.980599647	28	0	0.473777778	1124	7	0	0	0	0
395		0.011647331	91	0	0.660506329	3949	6	0	2	0	0
396		0.020452686	74	0	0.197034994	5800	6	0	1	0	1
397		1.057836532	68	0	0.604381202	5340	7	0	1	0	0
398		0.996829526	47	0	1.056864946	2672	9	0	2	0	0
399		0.055280919	72	0	3.5505816	2836	5	0	0	0	0
400		0.386538409	41	0	0.319736394	8800	4	0	1	0	1
401		0.027306542	71	0	0.335373771	10781	12	0	2	0	1
402		0.038602457	65	0	0.003666422	15000	4	0	0	0	0
403		0.127927092	50	0	0.246795151	11466	16	0	3	0	0
404		0.013504042	71	0	1524	NA	5	0	1	0	0
405		1.103039211	58	2	0.32835038	7625	13	5	1	7	1
406		0.9999999	52	0	0.436839176	14375	4	3	1	2	2
407		0.190535997	52	0	0.325482179	11250	20	0	2	0	0
408		0.03136513	58	1	0.497475059	8118	20	0	6	0	0
409		0.113747253	35	0	0.429163619	4100	9	0	1	0	1
410		0.29763721	42	0	0.249457205	8750	6	0	1	0	3
411		0.252812924	41	0	0.535558464	4583	7	0	2	0	2
412		0.490516983	63	0	2.697795071	1541	10	0	2	0	0
413		0.9999999	41	0	0.158650843	1600	1	0	0	0	0
414		0.013866482	48	0	0.250590087	5083	13	0	2	0	0
415		0.024399436	59	0	0.234614843	7100	11	0	1	0	1
416		0.038845447	63	0	0.258164852	4500	6	2	1	0	0
417		0.963394343	45	0	120	NA	3	0	0	0	1
418		0.482129468	41	0	409	NA	3	0	0	0	2
419		0.045237213	73	0	0.177278402	800	12	0	0	0	0
420		0.028394321	28	0	0.098980204	5000	9	0	0	0	0
421		0.042285139	75	0	0.317841079	2000	11	0	0	0	0
422		0.17819109	59	0	1368	NA	3	0	1	0	0
423		0.403091057	35	0	0.211175866	5833	6	0	0	0	3
424		0	78	0	0	0	1	0	0	0	0
425		0.023844931	62	0	0.001856878	7000	2	0	0	0	0
426		0.087456985	83	0	0.024469637	8908	11	0	0	0	0
427		0.002003451	80	0	6345	NA	17	0	6	0	0
428		0.233721395	54	0	0.256813059	14640	11	0	2	0	0
429		0.9999999	39	0	0.019486545	3232	2	0	0	0	0
430		0.040983296	55	0	0.065261926	3416	3	0	0	0	0
431		0.923907609	46	2	0.369977499	3110	4	0	0	0	4
432		0.032873018	66	0	2006	NA	12	0	1	0	0
433		0.015796841	44	0	0.342496285	2691	7	0	1	0	1
434		0.059087576	47	0	78	NA	9	0	0	0	0
435		0.316561146	50	0	0.006037001	5134	4	0	0	0	0
436		0.357326139	37	0	0.34688549	8042	12	0	1	0	2
437		0.648725212	27	0	0.298294328	2520	5	0	0	0	0
438		0.9999999	28	0	0.133041849	1600	4	0	0	0	1
439		0.016384128	56	0	0.137532355	11589	13	0	1	0	1
440		0.306127195	28	0	0.020794455	3750	6	0	0	0	1
441		0.004849758	49	0	3851	NA	6	0	3	0	0
442		0.441839974	42	0	0.259337033	6666	9	0	1	0	3
443		0.095967356	47	0	1.176373019	5425	6	0	4	0	2
444		0.029053337	76	0	0.052416867	50250	9	0	2	0	0
445		0.095516179	46	1	0.458610099	14000	10	0	2	0	5
446		0.447234545	39	2	1.265346931	5000	29	0	3	0	2
447		0.005419427	78	0	0.005851375	3417	14	0	0	0	0
448		0.9999999	22	0	0	2450	1	0	0	0	1
449		0.23424755	48	0	1.067055394	2400	13	0	3	0	3
450		0.007633037	72	0	0.194967017	4092	13	0	1	0	0
451		0.3896668	58	0	0.280625033	18750	11	0	4	0	4
452		0.065682239	62	0	1053	NA	6	0	1	0	0
453		0.696422118	27	0	0.426912929	1894	10	0	0	0	0
454		0.003659008	36	0	4078	NA	4	0	2	0	NA
455		0.608272088	46	0	1588	NA	10	0	0	0	2
456		0	38	0	0.61040856	6167	10	0	2	0	1
457		0.9999999	52	0	2252	NA	5	0	1	0	0
458		0	43	0	1107	NA	2	0	1	0	0
459		0.9999999	50	0	0.51144792	3100	6	0	1	0	1
460		0.005601218	52	0	1.665615142	950	7	0	1	0	0
461		0.073411053	42	0	0.396747253	11374	9	0	2	0	3
462		0.579003209	37	0	0.614461538	3249	6	0	1	0	1
463		0.10222985	61	0	0.346633416	3608	12	0	1	0	0
464		0.862266351	38	0	0.213139343	6666	7	0	0	0	0
465		0.393774078	53	0	0.507982583	6200	14	0	3	0	1
466		0.012484092	62	0	0.154605674	8000	2	0	1	0	0
467		0.089254186	60	0	0.247566991	7500	14	0	2	0	0
468		0.021088992	35	0	0.474540123	3750	8	0	1	0	1
469		0.109847113	75	0	0.184337349	2489	6	0	0	0	0
470		0.93838682	44	2	0.10499475	6666	6	0	0	0	1
471		0.003043346	81	0	2	NA	2	0	0	0	0
472		0.066743551	55	0	0.23009276	8300	11	0	2	0	1
473		1.03398867	64	4	0.169737678	11016	6	0	1	0	1
474		0.542554782	45	0	3086	NA	9	0	1	0	4
475		0	33	0	169	NA	8	0	0	0	0
476		0.138037679	75	0	0.099337748	1660	8	0	0	0	0
477		0	62	0	848	NA	4	0	1	0	0
478		0.172644072	61	0	0.363907426	7042	9	0	2	0	1
479		0.153920225	72	1	0.127110605	21083	9	0	2	0	1
480		0.232038398	73	0	0.104801404	6268	3	0	0	0	0
481		0.493982114	56	0	1.618966496	1760	10	0	3	0	0
482		0	96	0	0	3500	3	0	0	0	0
483		0.89693404	68	0	0.471449186	4850	7	0	0	0	1
484		0.594108305	45	0	2931	NA	9	0	1	0	0
485		0.004499934	69	0	8	NA	3	0	0	0	0
486		0.674188704	43	2	0.632040884	9000	20	0	1	0	2
487		0.9999999	83	0	4	NA	3	0	0	0	0
488		0.572499279	53	0	0.708902134	5200	13	0	1	0	0
489		0.002618143	52	0	43	NA	41	1	0	0	0
490		0.9999999	87	0	2	NA	1	0	0	0	0
491		0.029121781	63	0	0.135395836	8500	17	0	1	0	0
492		0.091459519	47	0	0.638920135	5333	15	0	2	0	1
493		0.900398406	53	0	0.11105318	5753	4	1	0	1	0
494		0.056248835	51	0	5181	NA	13	0	1	0	0
495		0.300733263	61	2	107	NA	2	0	0	1	0
496		0	56	0	0.041958042	1000	1	0	0	0	0
497		0.269102751	59	0	1848	NA	14	0	2	0	0
498		0.028076288	40	0	0.018490755	2000	4	0	0	0	0
499		0.372318745	37	1	0.502317369	4530	9	0	1	0	3
500		0	55	0	3061	NA	8	0	1	0	0
501		0.023436035	38	0	0.533439209	5666	4	0	2	0	2
502		0.079215686	49	0	0.30562579	6327	7	0	1	0	1
503		0.34241908	37	0	0.433126182	3700	5	0	0	0	0
504		0.032747834	47	0	0.262549393	6832	14	0	3	0	1
505		0.004407103	56	0	0.235095137	9459	7	0	2	0	2
506		0.366541162	62	0	0.691494982	13250	24	0	5	1	3
507		0.497443841	54	0	5512	NA	18	0	3	0	0
508		0.008350291	68	0	0.035288928	6800	6	0	0	0	0
509		0.058827662	63	0	0.22971707	5336	4	0	1	0	0
510		0.117068778	57	0	0.327581485	3650	7	0	1	0	1
511		0	41	0	0.256862745	6119	11	0	1	0	0
512		0.781158796	49	2	0.262543018	22083	11	0	2	1	3
513		0.728660678	50	0	0.144571295	8583	8	0	0	0	0
514		0.424578771	52	0	0.296450601	18481	6	0	1	0	2
515		0.141597019	46	0	0.507282153	4050	5	0	1	0	0
516		0.525636993	36	2	0.597005742	4875	15	0	4	0	0
517		0.064278073	64	0	0.237219803	6200	11	0	2	0	1
518		0.195737265	66	0	0.302774311	10416	10	0	3	0	0
519		0.092686829	60	0	0.217866982	12704	6	0	1	0	2
520		0.108717389	39	0	0.062993001	9000	6	0	0	0	0
521		0.00038684	62	0	0.068707285	13753	7	0	2	0	1
522		0.150772126	61	0	1731	NA	11	0	1	0	1
523		0.751477994	41	0	0.818950931	6500	6	0	2	0	2
524		0.023710868	62	1	764	NA	18	0	0	0	0
525		0.680207151	52	0	0.484224682	9666	14	0	1	0	1
526		0.962866109	28	1	0.584975721	3500	8	0	1	2	1
527		0.845093155	37	0	0.517303533	2773	11	0	0	0	0
528		0.02602187	54	0	0.268248341	11000	9	0	1	0	5
529		0.576360858	80	0	0.328237084	13800	10	1	3	0	0
530		0	42	0	0.022687609	4583	4	0	0	0	2
531		0	60	0	0.232606438	6740	5	0	1	0	0
532		0.022893755	88	0	0.005665722	6000	3	0	0	0	0
533		0.006408613	48	0	0.310137972	3333	7	0	0	0	1
534		0.027845297	89	0	1763	NA	3	0	1	0	0
535		0	40	0	0.231076892	10000	6	0	1	0	1
536		0.004645061	60	0	1374	NA	7	0	1	0	0
537		0.070795443	70	0	0.261801888	6248	27	0	1	0	1
538		0.450473052	47	0	0.634433639	7300	15	0	3	0	3
539		0.336607736	57	0	0.329766984	15234	13	0	2	0	0
540		0	67	0	0.204708006	14400	8	0	2	0	0
541		0.090537412	57	0	0.027486257	2000	9	0	0	0	2
542		0.249346305	54	0	0.25545807	4900	14	0	0	0	0
543		0.828997839	60	0	3030	NA	37	0	2	0	2
544		0.9999999	31	0	0.088205128	2924	1	0	0	0	1
545		0.024181657	30	0	0.3768	4999	10	0	2	0	0
546		0.001821033	68	0	0.106126258	15000	15	0	1	0	1
547		0.408637874	29	0	0.000731529	4100	1	0	0	0	1
548		0.101717886	69	0	2120	NA	8	0	1	0	2
549		0.01450702	83	0	0.00385439	2334	4	0	0	0	0
550		0.957260685	27	0	5.68081761	635	9	0	2	0	2
551		0.894591102	41	1	0.826071365	5576	17	0	1	0	0
552		0.441260693	61	1	0.265160118	26417	19	0	4	1	2
553		0	48	0	0.15052768	5400	2	0	1	0	0
554		0.056324863	53	0	0.254464807	8566	8	0	2	0	1
555		0.174806533	70	2	8864	NA	20	0	3	0	1
556		0	37	0	0.144435548	6244	6	0	0	0	4
557		0.130579614	26	0	0.275724276	1000	2	0	0	0	0
558		0.055942922	42	0	0.927051672	4605	7	0	2	0	0
559		0.733688415	44	0	0.037808467	4416	1	0	0	0	3
560		0.374356475	64	1	0.084102102	28833	13	0	1	0	0
561		0.000213951	72	0	0	NA	8	0	0	0	0
562		0	46	0	0	14000	3	0	0	0	2
563		0.562292623	40	1	0.397790684	8780	7	0	1	0	2
564		0.718620809	62	0	0.556377449	5001	5	0	1	0	0
565		0.99950025	28	0	0.575212394	2000	3	0	1	0	0
566		0.097752141	63	0	1112	NA	22	0	1	0	0
567		0.109615628	64	0	0.005384239	14300	3	0	0	0	1
568		0.272319824	64	0	0.750904063	4700	21	0	2	0	0
569		0.562291805	44	2	0.220939819	10916	8	2	1	0	0
570		0.554532507	75	0	0.50667528	4643	18	0	2	0	0
571		0.15364106	42	2	0.980862611	3500	6	0	2	0	1
572		0	39	0	0.851366363	4500	6	0	1	0	2
573		0.090558492	44	0	0.50355927	3230	3	0	1	0	3
574		0.126727824	41	1	0.45301079	5745	20	0	1	0	3
575		0.726163414	52	0	4276	NA	13	0	1	0	0
576		0.039807628	60	0	25	NA	4	0	0	0	0
577		0.9999999	64	0	0	6700	1	0	0	0	0
578		0.071939944	47	0	1277	NA	5	0	1	0	0
579		0.596280744	27	1	0.067786443	5000	5	0	0	0	0
580		0.084969373	58	0	2279	NA	8	0	2	0	0
581		0.002420925	37	0	0.318585177	8000	5	0	1	0	0
582		0.046798561	49	0	0.306744364	10467	21	0	2	0	0
583		0.044883763	65	0	0.255074493	10000	10	0	1	0	1
584		0.276451339	37	0	0.415551537	5529	5	0	1	0	1
585		0.427046402	38	0	0.28836132	3453	5	0	0	0	2
586		0.051099148	67	0	0.208639568	20000	11	0	2	0	0
587		0.009170826	62	0	2612	NA	16	0	3	0	0
588		0.714747681	45	0	0.594634507	4062	6	0	1	0	2
589		0.020521003	42	0	0.380925508	10631	9	0	2	0	2
590		0.015039733	56	0	0.187591885	3400	17	0	1	0	0
591		0.9999999	45	0	0	1166	0	0	0	0	0
592		0.010602848	31	0	0.258867224	5384	6	0	0	0	0
593		0.289109816	54	0	2450	NA	11	0	2	0	NA
594		0.124056095	77	0	0.22095829	2900	14	0	0	0	0
595		0.9999999	47	1	0.118675013	3833	2	0	0	0	0
596		0.175904479	74	0	10267	NA	9	0	3	0	0
597		0.218679466	41	0	1694	NA	3	0	1	0	0
598		0.170195745	72	0	3762	NA	15	0	4	0	0
599		0.016111728	49	0	1.301739652	3333	19	0	1	0	2
600		0.033349166	68	0	0.262794573	4200	16	0	2	0	0
601		0.127848402	63	0	307	NA	8	0	0	0	0
602		0.109652823	59	1	0.626804887	2700	3	0	1	0	0
603		0	51	0	0.351430761	7827	11	0	1	0	0
604		0.016686457	46	0	0.001342539	5213	6	0	0	0	0
605		0.9999999	37	0	0.115502855	2276	1	0	0	0	0
606		0.001121896	44	0	0.332954975	7928	6	0	1	0	2
607		0.049235546	51	0	0.373950038	9166	4	0	1	1	0
608		0.598175228	66	0	0.16557873	6280	4	0	1	0	0
609		0	33	0	0	NA	4	1	0	1	0
610		0.016248475	56	0	0.324723947	21100	17	0	4	0	0
611		0.567287785	38	0	0.326237213	3616	5	0	0	0	0
612		0.02320332	67	0	178	NA	5	0	0	0	0
613		0.016428322	57	0	770	NA	7	0	1	0	0
614		0.245426412	47	0	0.564287143	5000	10	0	1	0	3
615		0.239835327	60	0	0.33234163	13780	15	0	2	0	3
616		0.085180964	73	0	0.338636775	11061	6	0	2	0	0
617		0.138403187	72	2	0.089432023	7200	7	0	0	0	0
618		0.038999093	46	0	0.007152241	6850	3	0	0	0	0
619		0.152550131	56	0	0.227272727	4333	8	0	0	0	0
620		0.123258833	42	0	757	NA	9	0	0	0	2
621		0.010236573	61	0	11	NA	4	0	0	0	0
622		0.121832277	58	0	3.516802906	1100	16	0	3	0	1
623		0.260939955	63	0	0.205369894	3500	11	0	0	0	0
624		0.9999999	72	0	124	NA	5	0	1	0	NA
625		0.9999999	50	0	0.113372093	4815	5	0	0	0	0
626		0.759448293	42	3	0.905239961	4083	17	1	1	0	2
627		0.977524998	29	0	402	0	9	0	0	0	0
628		0.001076228	45	0	0.248796742	2700	5	0	0	0	2
629		0.004087481	63	0	389	NA	9	0	0	0	0
630		0.670874596	28	0	1.422525825	3000	10	0	2	0	0
631		0.010964448	73	0	0.515591526	4200	9	0	1	0	0
632		0.239058765	40	0	2679	NA	11	0	1	0	0
633		0.019998889	76	0	602	NA	3	0	1	0	NA
634		0.378283342	51	0	0.224958341	5400	14	0	0	0	1
635		0.044891254	55	2	0.375629796	12900	16	0	0	0	3
636		0.013552275	92	0	15	NA	5	0	0	0	NA
637		0.090927859	57	0	0.02089791	10000	5	0	0	0	1
638		0.455836628	56	0	0.255529226	10127	5	0	1	0	1
639		0.275483028	66	2	0.478861848	13600	27	0	2	0	0
640		0.0199995	63	0	0.098422543	7416	8	0	1	0	0
641		0.076436072	61	0	0.006928406	4329	7	0	0	0	0
642		0.773579464	59	1	1219	NA	9	1	0	0	0
643		0.405684359	44	2	0.242911959	9381	14	0	0	0	0
644		0.955718804	55	2	0.591663843	2950	6	1	1	1	2
645		0.764969657	36	0	0.356988082	3691	9	0	0	0	0
646		0.9999999	57	0	237	NA	4	1	0	0	0
647		0.068482039	66	0	0.223737177	7700	22	0	1	0	1
648		0.9999999	51	0	0.043626449	4400	10	0	0	0	2
649		0.181312747	65	0	0.142735514	19966	5	0	1	0	0
650		0.250697855	69	0	0.856857257	2500	4	0	0	0	0
651		0.9999999	24	0	0.042978511	2000	1	1	0	0	0
652		0.018131055	45	0	0.422627207	12400	8	0	2	0	3
653		0.474097061	37	0	165	NA	2	0	0	0	1
654		1.07641196	27	1	76	NA	4	1	0	0	NA
655		0.058057968	46	0	0.239965719	7000	11	0	1	0	1
656		0.383570701	66	0	0.329137357	2700	8	0	0	0	1
657		0.166248723	63	0	0.229692577	4000	9	0	1	0	0
658		0	61	0	0.114397321	3583	4	0	0	0	0
659		0.813543211	36	0	1.56928839	800	5	0	0	0	2
660		0.907694647	27	0	0.318622848	3194	13	0	0	0	1
661		0.373595987	43	0	0.390807941	13750	11	0	2	0	0
662		0.450331126	39	0	0.010712755	7000	2	1	0	0	4
663		0.664351121	32	0	2.363084613	2800	13	0	2	0	0
664		0.363691122	47	2	0.477061114	5906	10	0	1	0	2
665		0.624750499	33	0	0.286452947	2900	6	2	0	1	3
666		0.016675043	68	0	0.215673141	7464	4	0	1	0	0
667		0.08309574	32	0	0.158792651	1523	4	0	0	0	0
668		1.002502132	45	0	3023	NA	5	0	1	0	0
669		0.425082131	47	0	0.065539112	3310	4	1	0	1	3
670		0.646433872	69	0	0.271490414	4850	9	0	0	0	0
671		0.036333873	67	0	65	NA	11	0	0	0	NA
672		0.981462964	50	0	0.918416317	3333	5	0	1	0	0
673		0.565770679	60	0	0.026336294	6416	5	0	0	0	0
674		0.018061936	64	0	364	NA	3	0	1	0	0
675		1.034386246	51	0	0.925255891	4200	7	1	2	0	0
676		0.798800799	54	1	423	NA	7	0	0	0	NA
677		0.531842657	59	0	0.275191879	8077	7	0	1	0	1
678		0.494935811	69	0	0.440139965	4000	11	0	0	0	0
679		0.35922752	51	0	648	0	13	0	0	0	2
680		0.186062982	52	1	0.298570961	9166	15	1	1	0	0
681		0.077349919	40	0	3.277361319	2000	12	0	3	0	3
682		0.018163639	45	0	0.302423113	2145	5	0	0	0	0
683		0.769889254	59	0	0.354735152	4983	6	0	0	0	1
684		0.148311623	69	0	0.330281023	3166	15	0	1	0	1
685		0.168182468	30	0	0.635086884	4200	7	0	1	1	0
686		0.103955658	73	0	0.172388869	8300	4	0	1	0	0
687		0.07251457	60	0	0.105715944	18946	9	0	1	0	1
688		0	86	0	0.010799136	4166	3	0	0	0	1
689		0.9999999	36	0	0.080764075	2983	2	0	0	0	2
690		0.38626913	65	0	3092	NA	12	0	2	0	0
691		0.121528651	78	1	0.078403078	2078	9	0	0	0	0
692		0.9999999	40	0	0.001153403	2600	0	1	0	1	2
693		0.334690138	61	0	0.551694329	5783	14	0	1	0	0
694		0.055587205	67	1	700	NA	5	0	0	0	0
695		0.689238513	72	0	0.236173662	5550	8	0	0	0	0
696		0.081368059	50	0	0.503654413	9166	13	0	1	0	0
697		0.032083741	93	0	0.004061289	5416	2	0	0	0	0
698		0.335664336	56	0	0.009082652	1100	1	0	0	0	0
699		0.838632274	53	2	0.024995001	5000	2	0	0	0	2
700		0.258760814	66	0	1714	NA	10	0	1	0	0
701		0.033704246	74	0	0.188432549	6500	14	0	1	0	0
702		1.000618541	60	2	6218	NA	12	0	2	0	0
703		0.951368057	31	0	0.306713414	7700	11	0	3	0	0
704		0.9999999	23	98	0	NA	0	98	0	98	NA
705		0.01985514	50	0	0.862610683	3500	14	0	1	0	3
706		0.210328277	68	0	2914	NA	10	0	2	0	0
707		0.314853214	41	0	0.188978298	4100	7	0	0	0	2
708		0.242144447	64	0	0.420315582	5069	6	0	1	0	0
709		0.026054257	64	0	1.034386246	2500	29	0	1	0	0
710		0.00780176	65	0	32	NA	11	0	0	0	1
711		0.212881356	50	0	0.697391146	11000	20	0	3	0	1
712		0.969534608	41	0	0.533808983	6166	16	0	2	0	3
713		0.006746907	52	0	0.508684864	2820	12	0	1	0	0
714		0.167484126	58	0	0.224651683	9832	8	0	2	0	2
715		0.194805195	57	0	0.402825913	3750	5	0	1	0	0
716		0.701954187	53	3	0.425631295	6850	15	0	1	3	2
717		0.034565069	65	0	0.315515351	7295	11	0	2	0	2
718		0.441627047	27	0	0.12780386	3833	4	0	0	0	1
719		0.489037394	66	0	0.429809627	6460	10	0	1	0	0
720		0.013881177	81	0	0	974	4	0	0	0	1
721		0.040179196	66	0	2971	NA	11	0	1	0	0
722		0.074925075	27	0	0.109478104	3333	5	0	0	0	0
723		0.9999999	52	0	0.280743851	5000	2	0	2	0	0
724		0.048514635	36	0	2001	NA	8	0	1	0	0
725		0.9999999	48	2	1661	NA	2	0	1	0	NA
726		0.145582624	53	0	5598	NA	18	0	1	0	6
727		0.013731368	35	0	0.093121558	7806	13	0	0	0	0
728		0.286391536	47	0	0.462694995	28333	15	0	3	0	0
729		0.9999999	54	0	0.045189504	8917	2	0	0	0	0
730		1.176823177	39	1	0.590146751	1907	5	1	0	0	6
731		0	53	0	13	NA	16	0	0	0	0
732		0.507783543	60	0	0.641346689	3593	7	0	2	0	1
733		0.01079784	80	0	1	NA	1	0	0	0	0
734		0.09044229	47	0	0.07095616	10583	9	0	0	0	2
735		0.07157594	39	0	0.078230442	4000	7	0	0	1	0
736		0.468914282	73	0	3925	NA	17	0	1	0	0
737		0.010697957	47	1	0.361829771	8000	18	0	2	0	2
738		0.176350322	28	0	1655	NA	7	0	1	1	0
739		0	46	0	0.270805915	12916	9	0	2	0	3
740		0.013656753	64	0	0.135485047	5483	9	0	1	0	0
741		0.028726323	34	0	0.014889815	1678	3	0	0	0	0
742		0.102384239	47	0	959	NA	12	0	1	0	0
743		0.573657054	51	0	0.441633122	5216	7	0	1	0	1
744		0.329931342	60	0	4268	NA	11	0	1	0	0
745		0.27919918	61	0	895	NA	8	0	0	0	0
746		0.589259455	31	0	0.343381389	4577	5	0	1	0	1
747		0.109381573	62	0	0.013331556	7500	7	0	0	0	0
748		0.248165363	52	0	0.652449184	3000	13	0	0	0	1
749		0.467758064	49	0	0.278031688	6563	7	0	2	0	0
750		0.568295115	48	0	0.612060199	9833	11	0	2	0	0
751		0.75824144	48	1	0.875198728	5031	17	0	1	0	3
752		0.005824246	71	0	0.008493353	5415	10	0	0	0	0
753		0.22164344	64	0	0.21975121	25000	11	0	1	0	0
754		0.012648307	75	0	23	NA	5	0	0	0	0
755		0.001733926	33	0	0.621876735	1800	12	0	0	0	1
756		0	55	0	0.292941412	5000	7	0	1	0	1
757		0.600692861	70	0	4068	NA	21	0	1	0	0
758		0.220245191	67	0	0.362139918	1700	8	0	0	0	0
759		0.056763542	46	0	0.198984693	13000	5	0	1	0	0
760		0.112201779	49	0	0.21265418	8755	11	0	1	0	1
761		0.110571275	67	0	0.424718271	5412	10	0	1	0	0
762		0.398120376	54	0	0.052304965	1127	1	0	0	0	0
763		0.726130569	45	0	0.127597873	60000	18	0	4	0	2
764		0.022081374	56	0	0.149826334	6333	6	0	1	0	0
765		0.064025701	59	0	0.276210397	19600	21	0	4	0	2
766		0.9999999	40	0	2198	NA	7	0	1	0	0
767		0.001522129	64	0	0.202407672	4900	10	0	1	0	0
768		0.9999999	58	0	0.380599778	2700	2	0	0	0	0
769		0.399813865	71	0	0.234757092	9200	6	0	2	0	1
770		0.9999999	49	0	0	3640	0	0	0	0	0
771		0.007322367	63	0	0.28032825	12916	9	0	3	0	0
772		0.824052264	39	1	0.345428157	6200	8	0	0	0	4
773		0.366996426	48	1	3724	NA	13	0	1	0	0
774		0.025076978	51	0	1133	NA	12	0	1	0	0
775		0.161825321	41	0	0.411085167	8136	11	0	5	0	0
776		0.000162153	38	0	0.353160481	5900	5	0	1	0	3
777		0.501188956	43	1	0.44681271	5066	10	0	1	0	0
778		0.020606131	51	0	0.10015804	10123	13	0	1	0	3
779		0	48	0	0.426957304	10000	6	0	1	0	1
780		0.9999999	25	0	570	NA	2	1	0	0	0
781		0.01025714	59	0	0.102418798	7234	14	0	1	1	0
782		0	43	0	1.206131768	4598	8	0	2	0	0
783		0.039086958	56	0	0.43904471	3600	9	0	3	0	0
784		0.447177676	68	1	0.318446926	6000	6	0	0	0	0
785		0.206172447	49	0	822	NA	9	0	0	0	0
786		0.9999999	32	0	0.027594481	5000	1	0	0	0	0
787		0.014720368	57	1	0.675314147	7400	16	0	1	0	0
788		0.20918405	34	0	0.198422713	3169	9	0	0	0	0
789		0.026655356	62	0	0.645475519	3900	14	0	1	1	1
790		0.218960323	63	3	1.186167693	2110	8	0	2	0	0
791		0	41	0	0.785435169	2814	13	0	1	0	0
792		0.79683597	46	2	0.003670243	7083	4	1	0	0	3
793		0.063993601	57	4	4331	NA	7	0	1	0	0
794		0.134703548	42	0	0.086782643	5000	8	0	0	0	3
795		0.9999999	38	1	0.213934601	4678	2	0	0	1	1
796		0.12093061	71	0	0.20248484	6760	4	0	1	0	0
797		0.9999999	26	0	8	NA	3	0	0	0	NA
798		0.193283701	68	0	0.50603245	7210	17	0	1	0	1
799		0.452031268	48	2	12162	NA	11	0	3	1	0
800		0.237456891	30	0	0.355833476	5836	8	0	1	0	1
801		0.139959647	74	0	3709	NA	12	0	3	0	0
802		0	47	0	0	NA	4	0	0	0	0
803		0.560406599	30	0	0.039984006	2500	2	0	0	0	0
804		0.057411882	46	0	0.369858612	3111	7	0	1	0	0
805		0.257323394	48	0	0.100345392	5500	14	2	0	0	0
806		0.364628332	58	0	0.153592753	14570	11	0	2	0	1
807		0.111418207	67	0	0.280812641	6644	7	0	1	0	0
808		0.9999999	21	0	396	0	1	0	0	0	0
809		0.36595674	42	0	0.401956553	6950	15	0	2	0	2
810		0.263845614	56	1	0.247919489	15500	14	0	2	0	0
811		0.061570036	41	0	1.219876416	5825	23	0	4	0	0
812		0.014521255	86	1	0.003581555	6700	9	0	0	0	0
813		0.143825055	38	0	0.460513487	6153	13	0	2	0	1
814		0.113773573	36	0	0.276175041	9254	9	0	1	0	0
815		0.591362126	54	1	652	NA	2	0	1	0	0
816		0.382998262	28	0	0.130996517	8900	14	0	0	0	0
817		0.050686911	74	0	0.013197361	5000	3	0	0	0	0
818		0.212732272	58	0	0.389246834	4500	12	0	2	0	0
819		0	62	0	0	NA	4	0	0	0	NA
820		0.624548542	51	0	0.458032921	7350	10	0	0	0	0
821		0.105407349	35	0	342	NA	6	0	0	0	NA
822		0.485834684	61	1	0.435128519	4901	7	0	0	1	2
823		0	64	0	0.046891059	7783	3	0	0	0	2
824		0.000824979	28	0	33	NA	5	0	0	0	0
825		0.108645315	50	0	0.195196174	9200	11	0	1	0	1
826		0.355557451	65	0	0.358421345	8994	10	0	2	0	0
827		0.588141186	72	0	1.227332457	1521	6	0	2	0	0
828		0.354241325	55	0	0.147629653	22000	11	0	1	0	0
829		0.007057042	49	0	0.141343307	6416	15	0	0	0	0
830		0.039729241	41	0	0.358675276	4800	7	0	3	0	0
831		0.247259883	52	0	0.252447111	6333	5	1	1	0	3
832		0.070051664	33	0	1.834315169	1357	5	0	1	0	1
833		0.467327809	24	1	0.152705963	2900	8	0	0	0	0
834		0.056907613	59	0	0.193366573	4612	8	0	0	0	0
835		0.606901284	29	0	0.462835728	1600	4	0	0	0	0
836		0.175839363	38	0	0.433522159	3000	7	0	2	0	0
837		0.767740156	39	1	0.197243254	5150	8	0	0	0	3
838		0	31	0	0	2300	4	0	0	0	0
839		0.841446342	43	0	0.530308711	8000	8	0	4	0	3
840		0.9999999	51	0	46	NA	0	2	0	0	NA
841		0.936767923	53	0	0.99676443	9580	18	0	2	0	1
842		0.023793957	53	0	0.508470226	11687	16	0	6	0	2
843		1.024398373	38	0	2248	NA	10	0	1	0	0
844		0.439770008	37	0	0.706748126	3600	10	0	1	0	1
845		1.130031949	67	2	980	NA	7	1	0	3	0
846		1.006820535	36	8	0.698026147	3900	15	0	1	1	2
847		0.044998125	57	0	0.069643165	5800	10	0	0	0	2
848		0.156101155	76	0	3015	NA	7	0	2	0	0
849		1.033804158	31	0	0.533513879	1476	8	0	0	0	3
850		0.003424129	52	0	0.005278311	2083	18	0	0	0	2
851		0.9999999	77	0	0.073737821	4515	3	0	0	0	0
852		0.00843556	88	0	0.005950964	4200	15	0	0	0	0
853		0.869666131	44	0	0.51616128	3000	6	0	2	0	1
854		0.002849593	27	0	0.003198721	2500	7	0	0	0	0
855		0.013593325	81	0	0.126098136	9333	3	0	1	0	0
856		0.452580635	47	0	2120	0	6	0	1	0	0
857		0.205373248	28	0	0.224962506	6000	14	0	0	0	0
858		0.27434033	54	0	1.115631692	1400	19	0	1	0	0
859		0.007181492	70	0	4	NA	4	0	0	0	0
860		0.297318682	64	1	0.420702365	9766	27	0	2	0	0
861		0.865671642	35	0	0.055804572	4461	3	1	0	0	3
862		0.043826029	68	0	1289	NA	6	0	1	0	0
863		0.035664968	49	0	0.210601719	5583	4	0	1	0	1
864		0.050233067	47	0	0.396334812	13750	4	0	2	0	2
865		0.203936118	57	0	223	NA	5	0	0	0	0
866		0.039545788	58	0	0.557520477	5371	6	0	1	0	0
867		0.003918471	69	0	0.249022164	3834	10	0	1	0	0
868		0.9999999	35	0	0.019921544	13000	2	0	0	0	0
869		0.079315929	46	1	0.318037887	18000	13	0	2	0	2
870		0.032786314	77	0	0.045747158	7300	7	0	1	0	0
871		0.161238422	68	0	0.320174314	3900	11	0	0	0	1
872		0.041270464	54	1	0.228052967	4077	7	0	1	0	0
873		0.036231636	60	0	0.214949071	6675	8	0	2	0	0
874		0.059451843	85	0	0.029326816	4500	5	0	0	0	0
875		0.077854918	78	0	0.104486939	8000	3	0	0	0	1
876		0.177241138	34	0	0.660377358	6200	8	0	3	0	0
877		0.001540612	61	0	0.683684398	2800	11	0	1	0	0
878		0.149671522	44	0	0.500833135	4200	9	0	1	0	3
879		0.052025269	73	0	0.005242311	8583	3	0	0	0	0
880		0.11877241	41	0	0.434267444	10633	11	0	3	0	0
881		0.099180164	42	0	31	NA	3	0	0	0	0
882		0.9999999	30	0	1347	NA	3	0	1	0	0
883		0.012255782	46	2	0.00123058	6500	5	0	0	0	3
884		0.9999999	68	0	0.410294853	2000	2	0	1	0	1
885		0	84	0	0	NA	2	0	0	0	NA
886		0.022567689	35	0	0.328097731	4583	10	0	2	0	0
887		0.113858702	56	2	0.167258208	6761	11	0	1	0	1
888		1.047952048	40	1	0.047740618	7833	5	0	0	2	0
889		0.542258344	66	0	0.257049018	16136	16	0	2	0	0
890		0.468194818	49	0	1841	0	19	0	1	0	2
891		0.066011139	70	0	0.207656066	8489	20	0	1	0	0
892		0.009577584	49	0	0.185067958	5370	7	0	1	0	1
893		0.9999999	44	0	0.226745684	7761	3	4	1	0	3
894		0.959008198	31	3	0.386005256	3043	5	2	0	2	1
895		0.347253264	53	0	0.224868985	6296	7	0	1	0	0
896		0.144205783	33	0	0.046635813	2808	4	0	0	0	0
897		0	52	0	0.241081427	6250	3	0	1	0	0
898		0.013010994	70	0	0.163945645	10228	8	0	2	0	1
899		0.087154149	41	0	0.203885344	10500	18	0	2	0	0
900		0.020745635	71	0	0.173386129	8333	9	0	1	0	0
901		0.376623377	24	0	0.002399651	4583	1	0	0	0	0
902		0.441742023	40	0	0.357971746	3963	4	0	1	0	3
903		0.068961545	54	0	0.131599936	6268	11	0	1	0	1
904		0.040861063	64	0	0.274756987	6583	9	0	2	0	0
905		0.030266135	62	0	0.311158512	7500	10	0	1	0	0
906		0.090318069	48	0	833	NA	13	0	0	0	2
907		0.381899385	44	2	0.328500707	8483	5	0	1	0	2
908		0.451601683	68	0	0.747903706	3696	12	0	0	1	0
909		0.367066895	57	1	0.429314137	5000	9	0	2	0	2
910		0.352920856	60	0	0.357964204	10000	8	0	2	0	0
911		0.308715689	42	0	0.004892232	65000	6	0	0	0	0
912		0.310015971	44	0	0.660578387	2627	20	0	1	0	0
913		0.026924929	75	0	0.006296852	3334	5	0	0	0	0
914		0	43	0	0.353276846	5782	5	0	1	0	2
915		0.458584538	44	0	0.798098025	4100	6	0	2	0	4
916		0	22	0	0	820	3	0	0	0	0
917		0.204498978	23	0	0.016196761	1666	2	0	0	0	0
918		0.004619051	63	0	0.973097617	1300	5	0	1	0	0
919		0.390591295	60	0	0.385452347	4962	8	0	1	0	0
920		0.409878652	77	0	345	NA	3	0	0	0	0
921		0.67663061	47	0	4235	NA	7	0	1	0	1
922		0.908415184	38	0	1.985677083	767	5	0	2	0	2
923		0.552855848	66	2	0.257652669	6500	9	0	0	0	0
924		0.012577225	43	0	0.280571643	24000	18	0	1	0	0
925		0.028957864	51	0	0.001249688	4000	3	0	0	0	0
926		0.074250357	25	1	0.32773781	1250	4	0	0	0	0
927		0.731817879	32	0	0.341590865	5166	3	0	2	0	0
928		0.249045628	47	0	0.357217246	4800	6	0	1	0	1
929		0.485117423	61	0	0.776315789	6611	17	0	2	0	2
930		0.598421266	47	3	0.633574825	8833	12	0	1	0	2
931		0.004515546	65	0	0.416612673	7716	6	3	2	0	1
932		0.016932769	39	0	0.669079628	2900	8	0	1	0	3
933		0.115922718	23	0	0.001954652	2557	2	0	0	0	0
934		0.014931171	45	0	0.292972058	7085	45	0	1	0	3
935		0.055542031	79	0	1866	NA	6	0	2	0	0
936		0.018976335	84	0	25	NA	4	0	0	0	0
937		0.222177782	64	0	66	0	3	0	0	0	0
938		0.121643918	42	0	0.193617477	4668	5	0	1	0	2
939		0.115206632	53	0	0.868906768	4225	14	0	3	0	3
940		0.041274022	91	0	30	NA	1	0	0	0	0
941		0.9999999	36	0	0.179064187	3333	4	0	0	0	0
942		0.004547894	77	0	22	NA	2	0	0	0	NA
943		0.263957124	45	1	0.079539221	7291	3	0	1	0	2
944		0.9999999	52	1	0.121551985	3298	2	0	0	0	2
945		0.034682655	48	0	0.323040729	6800	18	0	1	0	2
946		0.00794695	34	0	0.390357698	4500	5	0	1	0	0
947		0.438819381	49	0	0.661177961	3157	10	0	1	0	0
948		0.068410966	43	0	0.39340165	4000	5	0	1	0	3
949		0	35	0	0.260484623	8583	7	0	2	0	3
950		0.016617578	51	0	1.65470852	222	4	0	0	0	0
951		0	76	0	0	NA	3	0	0	0	0
952		0.58290285	27	1	0.195601466	3000	4	0	0	0	0
953		0.9999999	56	0	0	NA	1	0	0	0	NA
954		0.013164473	73	0	3	NA	8	0	0	0	0
955		0.925028324	60	1	1302	NA	10	0	1	0	0
956		0.110132532	60	1	0.25698324	3400	14	0	0	0	0
957		0.003333232	43	0	0.00869826	3333	3	0	0	0	1
958		0.428571429	61	0	0.21035533	4924	8	0	0	0	0
959		0.181217238	59	0	0.371727749	4583	9	0	2	0	0
960		0.069512356	73	0	0.475104979	3333	9	0	1	0	0
961		0.108563315	58	0	0.033062731	6774	7	0	0	0	0
962		0.203056044	58	0	1755	NA	9	0	1	0	3
963		0.004243535	71	0	0.124678079	6600	12	0	1	0	1
964		0.106530267	42	0	0.23631018	2720	8	0	1	0	3
965		0.067909352	49	0	0.569500852	7632	16	0	2	0	3
966		0.161516581	41	0	0.68518783	7000	15	0	2	0	1
967		0.207531447	48	1	0.353083659	5366	5	0	2	0	1
968		0.931087525	66	0	0.28029819	4694	8	0	2	0	1
969		1.02182055	24	1	0.284571809	3000	4	0	0	0	0
970		0.568721564	62	0	363	0	5	1	0	0	0
971		0.124252466	68	0	3294	NA	11	0	1	0	0
972		0.643454705	41	1	0.142348754	1685	5	1	0	0	4
973		0.024260136	48	0	2662	NA	9	0	3	0	0
974		0.439626629	47	0	1.11023804	4326	16	0	2	0	1
975		0.057795426	59	0	0.27584052	8000	10	0	1	0	0
976		0.191776275	35	0	0.023999727	88000	7	0	1	0	0
977		0.9999999	40	0	0.13961098	5500	3	0	0	0	2
978		0.843537676	61	0	0.245639119	10490	8	0	1	0	1
979		0.403541291	31	0	0.638676845	2750	11	0	2	0	0
980		0.783349751	43	5	0.287578055	8967	9	2	2	0	0
981		0.069172402	80	0	0.015205725	2235	5	0	0	0	0
982		0.067042955	56	0	0.125307125	17500	7	0	1	0	1
983		0.110285325	58	0	0.36	10499	12	0	2	0	1
984		0.104695862	76	0	1890	NA	9	0	1	0	0
985		0.279055457	33	0	2.473526474	1000	7	0	1	0	2
986		0.809476194	52	3	0.354615194	4040	9	0	0	0	1
987		0.059697015	55	0	0.101241563	12000	4	0	1	0	0
988		0.007359398	56	0	0.329416702	4765	13	0	1	0	3
989		0.147493931	41	0	0.334752824	5400	8	0	1	0	0
990		0.010561033	36	0	0.61987041	4166	8	0	1	0	0
991		0.211450225	57	0	0.774560496	2900	10	0	1	0	0
992		0.011621751	67	0	15	NA	5	0	1	0	0
993		0.007899868	49	0	0.351277936	8098	6	0	1	0	1
994		0.147645528	54	0	1.197160568	5000	12	0	2	0	2
995		0.032786885	79	0	0.117952819	2500	5	0	0	0	0
996		0.464687191	51	2	0.977536503	5341	12	0	2	2	2
997		0.018904054	69	0	0.146983668	9000	13	0	0	0	2
998		0.151569686	29	0	0.387526779	4200	8	0	1	0	2
999		0.136736072	54	0	0.351544337	6021	7	0	1	0	1
1000		0.20301026	60	0	0.299405716	10600	11	0	1	0	1
1001		0.016230145	82	0	12	NA	3	0	0	0	0
1002		0.767593364	41	0	0.43376104	6000	7	0	2	0	0
1003		0.083758938	37	0	0.577570405	6000	10	0	1	0	2
1004		0.25977183	57	0	4302	NA	10	0	2	0	2
1005		0.803073231	49	0	0.187940006	9800	4	0	0	0	2
1006		0.013570459	50	0	0.00108672	4600	1	0	0	0	3
1007		0.076832384	61	1	5.682196339	600	12	0	2	0	0
1008		0.028461025	64	0	0.064132327	6891	9	0	0	0	0
1009		0	38	0	4615	NA	3	0	1	0	0
1010		0.00340213	51	0	0.097778122	12916	13	0	2	0	0
1011		0.012696275	59	0	0.185363401	13923	24	0	2	0	3
1012		0.002153059	49	0	0.540491902	5000	7	0	1	0	2
1013		0.119594041	54	0	0.170887763	3750	12	0	0	0	0
1014		0.9999999	34	0	0	1900	3	0	0	0	0
1015		0.184838373	63	0	0.71770972	750	7	0	0	0	0
1016		0.763142625	49	1	0.812455364	7000	8	0	3	0	1
1017		0.09986587	89	0	24	NA	1	0	0	0	NA
1018		0.9999999	82	0	0.035175879	19501	6	1	0	1	0
1019		0.27701939	55	0	0.42712294	2366	10	0	0	0	0
1020		0.007571158	83	0	6	NA	6	0	0	0	0
1021		0.236215033	54	0	3472	NA	11	0	1	0	0
1022		0.140607205	40	0	0.704416761	6180	10	0	4	0	0
1023		0	31	0	0.387623257	5881	6	0	2	0	0
1024		0.638446327	77	1	0.417758907	5416	22	0	1	1	0
1025		0.081032127	52	0	0.14187413	12933	28	0	2	0	0
1026		0.07563842	57	0	2500	NA	9	0	1	0	2
1027		0.134773045	37	0	0.265207596	3106	6	0	0	0	2
1028		0.053414238	30	0	50	NA	3	0	0	0	NA
1029		0.038297982	76	0	44	NA	2	0	0	0	NA
1030		0.05189827	60	0	906	NA	9	0	0	0	1
1031		0.078065852	50	0	499	NA	3	0	1	0	0
1032		0.038603529	35	0	0.386051744	13334	7	0	5	0	1
1033		0.063593088	63	0	0.192987134	15000	16	0	2	0	0
1034		0.662274696	70	0	0.367020458	6500	6	0	1	0	0
1035		0.006920049	68	0	0.002510986	7964	8	0	0	0	0
1036		0.064076391	39	0	1082	NA	13	0	1	0	0
1037		0.003781809	54	0	1	NA	5	0	0	0	1
1038		0.002749771	62	0	0	NA	7	0	0	0	NA
1039		0.144914264	68	0	0.115554921	7000	13	0	0	0	1
1040		0.018228634	70	0	0.003809161	10500	8	0	0	0	0
1041		0.653125739	60	0	6393	NA	14	0	6	0	0
1042		0.922685504	54	2	0.768757477	5850	17	0	2	0	3
1043		0.008550415	31	0	0.096543845	3500	3	0	0	0	0
1044		0.492577912	49	0	0.522198224	8333	13	0	3	0	2
1045		0.002661934	33	0	0.266888822	3300	9	0	0	0	2
1046		0.034249626	44	0	25	NA	7	0	0	0	0
1047		0.00313505	38	0	0.00087745	3418	3	0	0	0	0
1048		0.416648393	69	0	0.399581987	5262	13	0	1	0	0
1049		0.001198949	34	0	1295	NA	12	0	1	0	0
1050		0.033263985	52	0	0.330343126	8917	12	0	1	0	3
1051		0.25740065	57	0	0.127858628	6733	8	0	0	0	0
1052		0.582708646	29	0	0.12575638	3800	3	0	0	0	0
1053		0.921179562	40	1	0.419718034	10213	12	0	2	0	1
1054		0.025943451	62	0	33	NA	4	0	0	0	0
1055		0.795614722	31	0	0.344070081	7419	10	0	0	0	3
1056		0.002219826	75	0	2	NA	4	0	0	0	0
1057		0.093776584	63	0	1264	NA	5	0	1	0	0
1058		0.097804391	22	0	0.000895255	1116	2	0	0	0	0
1059		0.9999999	35	0	0.192008879	900	1	0	0	0	0
1060		0.468713778	28	0	0.226912363	4666	11	0	0	0	0
1061		0.022471146	77	0	0.193236715	1034	8	0	0	1	0
1062		0.9999999	58	0	586	NA	4	0	1	0	0
1063		0.023592343	63	0	0.325737834	16500	15	0	2	0	2
1064		0	50	0	0.678928429	2500	9	0	1	0	0
1065		0.956183434	49	0	0.573737178	10333	16	0	2	0	1
1066		0.9999999	64	0	987	0	4	0	1	0	1
1067		0.467377909	52	0	2292	NA	4	0	1	0	0
1068		0.026886285	69	0	0.108202443	4583	6	0	0	0	0
1069		0.053750289	43	0	0.435391152	4000	5	0	1	0	1
1070		0.026248262	62	0	0.406871949	5325	16	0	1	0	0
1071		0.057423103	36	0	484	NA	4	0	0	0	0
1072		0.808451539	50	0	0.246458924	4588	7	0	0	0	2
1073		0.61765098	58	0	809	NA	2	1	0	1	0
1074		0.172727415	29	0	0.080548097	10800	7	0	0	0	0
1075		0.262986784	61	0	0.553566158	10164	14	0	2	0	1
1076		0.9999999	36	0	2308	0	3	0	2	0	3
1077		0.60328306	57	0	0.088273663	6898	3	0	0	0	1
1078		0.009369956	59	0	162	NA	9	0	0	0	0
1079		0.512487512	22	1	0.118486795	1400	3	0	0	0	0
1080		0.398451685	61	0	0.652918385	8000	17	0	2	0	1
1081		0.9999999	67	0	1077	NA	4	0	1	0	0
1082		0.286285654	28	0	0.168359942	4133	7	0	0	1	0
1083		0.15287336	54	0	0.803556658	4835	4	0	1	0	1
1084		0.175425705	61	1	1.136910268	1080	10	0	1	0	0
1085		0.333374399	41	0	1156	NA	8	0	1	0	1
1086		0	65	0	0.06548933	1358	5	0	0	0	0
1087		0.423915217	65	0	0.041529334	1516	2	0	0	0	0
1088		0.991078296	36	0	2811	0	4	0	2	0	4
1089		0.531452087	49	0	0.158800176	6800	6	1	0	1	1
1090		0.183923335	70	0	0.303222489	5833	11	0	2	0	0
1091		0.056647168	42	0	0.271240565	10333	6	0	1	0	0
1092		0.030311869	63	0	2211	NA	9	0	2	0	0
1093		0.838232354	38	0	0.292541492	5000	11	0	1	0	0
1094		0.0119167	49	0	0.251595086	10500	15	0	1	0	0
1095		1.033212912	32	0	0.496769728	4333	9	0	1	0	0
1096		0.898389363	42	0	2402	NA	5	0	1	0	0
1097		0.727775741	66	0	0.052395808	12500	1	0	0	0	0
1098		1.02544298	44	0	0.01349892	5555	5	0	0	0	0
1099		0.673663492	44	1	0.454917028	12232	13	0	2	0	1
1100		0.949465288	63	0	0.565387016	6407	4	0	1	0	0
1101		0.106655912	42	0	0.523047252	5184	10	0	2	0	0
1102		0.036312412	51	0	1586	NA	9	0	2	0	1
1103		0.28553753	44	0	3946	NA	14	0	1	0	0
1104		0	69	0	0.005055147	2175	3	0	0	0	0
1105		0.170115505	36	0	0.710657868	5000	10	0	2	0	1
1106		0.9999999	58	0	1482	NA	3	0	2	0	0
1107		0	27	0	0	1	2	0	0	0	0
1108		0.88510673	38	0	0.812886495	5012	10	0	2	0	4
1109		0.643817809	58	1	0.424766019	8333	5	0	2	0	3
1110		0.132708495	52	0	0.129993113	5807	7	0	0	0	2
1111		0.17420112	54	0	3313	NA	10	0	2	0	3
1112		0.05704589	44	0	0.011954023	8699	6	0	0	0	3
1113		0.113043478	49	0	0.333066709	6250	9	0	3	0	0
1114		0.461744403	52	0	0.298358315	12608	8	0	2	0	0
1115		0.08334398	56	0	0.431961121	6995	9	0	1	0	3
1116		0.181296868	30	0	1051	NA	6	0	1	0	0
1117		0.340720029	61	1	0.838554859	7500	22	0	2	0	1
1118		0.930918063	61	0	920	NA	4	1	0	0	0
1119		0	33	0	1824	NA	4	0	2	0	0
1120		0.129803237	49	0	0.363727255	5000	23	0	1	0	3
1121		0.402356174	52	0	2316	NA	15	0	2	0	0
1122		0.008992774	57	0	0.158127208	13583	8	0	2	0	0
1123		0	24	0	520	NA	3	0	0	0	NA
1124		0.776499589	38	1	0.082990115	14567	7	0	0	0	4
1125		0.25104536	76	0	0.658142665	5200	25	0	1	0	0
1126		0.9999999	35	0	611	NA	2	0	0	0	1
1127		0.178716163	61	0	0.188734455	4100	7	0	0	0	2
1128		1.058658845	53	2	0.166741708	6662	6	0	0	0	2
1129		0.204332932	41	0	69	NA	4	0	0	0	NA
1130		0.273549158	53	0	0.384341253	9259	13	0	2	0	2
1131		0.115880613	48	0	0.25415999	8112	7	0	2	0	3
1132		0.9999999	24	98	0	NA	0	98	0	98	0
1133		0.12972719	59	0	0.008228697	729033	16	0	2	0	3
1134		0.916558668	37	0	744	NA	7	0	0	0	0
1135		0.617560272	54	0	0.966008268	2176	12	0	1	1	0
1136		0.572703532	61	0	0.755830557	2100	10	0	1	0	0
1137		0.045391236	67	0	462	NA	8	0	0	0	0
1138		0.028241516	43	0	62	NA	7	0	0	0	0
1139		0.366925417	64	0	0.239600071	5600	14	0	1	0	0
1140		0.039294242	46	0	0.017556693	4100	5	0	0	0	2
1141		0	21	0	0	820	2	0	0	0	0
1142		0.035059844	45	0	2750	NA	10	0	1	0	0
1143		0.626780627	32	1	0.497502498	1000	3	0	0	0	0
1144		0.359282488	58	2	0.378405399	4000	7	1	1	0	6
1145		0.494755416	38	0	0.294729542	4325	6	0	0	0	4
1146		0.181670582	40	0	0.404910755	11036	14	0	3	0	1
1147		0.521235886	49	0	0.606039396	10000	16	0	4	0	2
1148		0.406444119	62	0	0.410009523	9450	6	0	2	0	0
1149		0.331434551	58	0	0.491825409	13333	26	0	3	0	2
1150		0.13382268	47	0	0.290589362	11486	9	0	1	0	0
1151		0.22899861	52	0	566	NA	6	0	0	0	NA
1152		0.787418698	62	0	0.937624908	9506	15	0	4	0	0
1153		0.098362705	67	0	1343	NA	2	0	1	0	0
1154		0	52	0	0.35124325	15000	11	0	2	0	0
1155		0.9999999	48	0	3.433152853	2400	5	0	4	0	0
1156		0	47	0	234	NA	2	0	0	0	0
1157		0.9999999	27	0	0.148296593	3492	3	1	0	2	0
1158		0.9999999	37	0	0.554189085	1300	4	1	0	2	3
1159		0.219518509	45	0	4424	NA	18	0	4	0	3
1160		0.059132437	38	0	0.219402225	13750	4	0	1	0	0
1161		0.9999999	47	2	0.20148423	2694	4	0	0	0	1
1162		0.507458171	34	0	0.498639624	4042	8	0	2	0	0
1163		0.144821385	47	0	0.69508968	3400	14	0	3	0	0
1164		0.74991445	63	0	0.449019185	13916	13	0	2	0	1
1165		0.024592247	50	0	0.300339932	5000	10	0	1	1	1
1166		0	39	0	0.640300231	1731	11	0	0	0	0
1167		0.9999999	21	98	0	NA	0	98	0	98	NA
1168		0.023081722	53	0	579	NA	8	0	1	0	NA
1169		0	73	1	0	NA	7	0	0	0	0
1170		0.192244153	28	0	0.145393474	4167	6	0	0	0	0
1171		0.637016447	35	0	0.556675063	2381	5	3	0	0	0
1172		0.126038843	40	0	0.192648923	3944	6	0	0	0	1
1173		0.044489324	54	0	0.768824485	7383	10	0	2	0	1
1174		0.090799129	40	0	0.351286655	3341	8	0	2	0	0
1175		0.336388634	75	1	0.336239827	12041	10	0	3	0	0
1176		1.472545757	58	0	0.02699865	6666	2	1	0	1	1
1177		0.9999999	25	98	0	2935	0	98	0	98	0
1178		0.9999999	59	0	0.051194881	10000	1	1	0	0	0
1179		0.057751386	75	0	0.380915884	20875	16	0	5	0	1
1180		0.9999999	34	0	0	NA	0	0	0	0	0
1181		0.814298697	47	2	0.305980529	3594	14	1	0	1	1
1182		0.452043601	47	0	0.398373065	8850	9	0	1	0	4
1183		0.374532983	47	0	0.782833506	2900	15	0	1	0	2
1184		0.737139991	25	0	0.148251748	2144	6	0	0	1	0
1185		0.139286904	42	0	1.058907533	2800	11	0	2	0	0
1186		0.413378268	38	1	0.912845034	4600	12	0	1	0	0
1187		0.918831296	54	0	2349	NA	19	0	1	0	0
1188		0.974169058	33	1	0.78584392	550	3	3	0	1	0
1189		0.689877004	46	0	0.597688187	3546	8	0	1	0	0
1190		0.028274293	61	0	0.210771511	14166	7	0	2	0	0
1191		0.837475007	60	6	0.709041565	7000	11	0	1	3	0
1192		0.038687256	60	0	625	NA	4	0	1	0	0
1193		1.045105102	30	1	0.685997469	4741	12	1	0	0	2
1194		0.545454545	67	0	384	NA	5	0	0	0	0
1195		0.917877616	38	0	0.85104965	3000	7	0	2	0	2
1196		0.017368537	81	0	0.258534495	7000	12	0	1	0	1
1197		0.030404584	62	0	154	NA	3	0	0	0	0
1198		0.064739542	58	0	0.033991502	4000	7	0	0	0	0
1199		0.578285189	43	0	0.736624705	5083	11	0	2	0	0
1200		0.861427714	59	0	5636	NA	11	0	2	0	3
1201		0.9999999	67	0	0	NA	1	0	0	0	0
1202		0	61	0	0	NA	4	0	0	0	0
1203		0.025671794	67	0	0.005261773	3800	4	0	0	0	0
1204		0.0187525	69	0	60	NA	5	0	0	0	0
1205		0.055910973	41	0	0.167014614	2394	7	0	0	0	1
1206		0.136873681	63	0	0.0133829	2689	2	0	0	0	0
1207		0.99579815	41	1	0.329950008	6600	9	3	1	0	2
1208		0.189885126	59	1	3502	NA	11	0	2	0	0
1209		0.9999999	46	0	0.831389537	3000	6	0	2	0	2
1210		0.065274322	47	0	0.307147912	9890	16	0	2	0	3
1211		1.013499759	56	0	0.547662475	10416	10	0	2	0	2
1212		2.231096113	32	0	0.572134749	5461	8	0	1	0	0
1213		0.034587218	69	0	0.008497876	4000	2	0	0	0	0
1214		0	79	0	2883	NA	6	0	1	0	0
1215		0.9999999	64	1	0.889688249	2501	3	8	1	1	0
1216		0	58	0	0.36415896	4000	18	0	2	0	1
1217		0.179695187	49	1	0.509805677	11166	12	0	4	0	1
1218		0.046741356	74	0	0.007328448	1500	6	0	0	0	0
1219		0.028843803	58	0	0.069932998	4775	11	0	0	1	0
1220		0.255083848	67	0	0.488826816	3221	11	0	1	0	0
1221		0.644652019	37	0	0.361837231	9448	4	0	2	0	0
1222		0.379047675	76	1	1202	NA	7	0	1	0	0
1223		0.382617383	31	0	0.028088356	11000	2	1	0	0	0
1224		0.205578208	73	0	0.036654049	10830	3	0	0	0	0
1225		0.993544576	38	0	2565	NA	2	0	1	0	0
1226		0.066451895	60	0	0.405448486	6900	27	0	2	0	0
1227		0.16885109	68	0	0.238595176	8000	7	0	2	0	0
1228		0.407262263	56	0	1.691005954	3190	13	0	3	0	0
1229		0.221613771	63	0	0.687065035	4166	8	4	2	0	0
1230		0.812767475	46	0	1673	NA	6	6	1	0	0
1231		0.076623179	68	0	0.744167444	7500	15	0	2	0	1
1232		0.437686496	41	2	0.391613362	7034	7	0	1	0	3
1233		0.116976989	51	0	0.346650999	5956	15	0	2	0	0
1234		1.475083056	44	2	0.615195173	8120	10	9	1	0	3
1235		0.976398044	39	3	0.858885675	7950	9	6	2	3	2
1236		0.023808237	58	0	0.144320487	9859	12	0	1	0	0
1237		0.79206931	45	0	0.125590649	4020	2	0	0	0	1
1238		0.934319246	43	6	0.207664095	7906	12	0	0	1	3
1239		0.71460686	31	0	0.382326821	6755	9	0	1	0	2
1240		0	34	0	0.638590352	4000	6	0	2	0	0
1241		0.029214541	79	0	24	NA	7	0	0	0	0
1242		0.081236149	63	1	0.368574672	6166	6	0	1	0	0
1243		0.005928148	45	0	0.056055363	4334	4	0	0	0	0
1244		0.243028117	40	0	0.083282527	8200	15	0	0	0	0
1245		0.528032549	32	0	0.153701968	3200	7	0	0	0	0
1246		0.155287422	38	2	0.558830521	4206	10	0	1	0	0
1247		0.283704771	43	0	0.143687515	4300	3	0	0	0	3
1248		0.01619964	83	0	0.518779343	851	4	0	1	0	0
1249		0.9999999	39	0	0.0937009	7000	1	0	0	0	4
1250		0.201313237	60	0	0.326549818	8500	8	0	1	0	3
1251		0.309135735	24	0	0.343589744	194	3	1	0	0	0
1252		0.076151746	39	0	0.062284589	8123	7	0	0	1	0
1253		0	65	0	2137	0	8	0	1	0	0
1254		0.670852109	28	0	1.138801262	4120	9	0	1	0	1
1255		0.428159612	50	0	5178	NA	12	0	2	0	1
1256		0.106171069	47	1	1.197901049	2000	10	0	2	0	0
1257		0.464788732	58	0	0.319390499	6693	10	0	2	0	1
1258		0.062316814	41	0	0.221080949	4088	7	0	1	0	4
1259		0.026948239	48	0	2757	NA	5	0	1	0	0
1260		0.565915872	49	0	0.518637532	4667	11	1	2	0	2
1261		0.077633423	36	0	0.285714286	8000	19	0	2	0	1
1262		0.805688805	69	1	0.253807107	6500	12	0	1	0	0
1263		0.747227052	53	0	1.042972247	3350	10	0	2	0	3
1264		0	62	0	0.594564794	15417	10	0	2	0	1
1265		0.028040614	80	0	0.152853792	5115	6	0	1	0	2
1266		0.010325101	39	1	0.078733616	10833	4	0	0	0	0
1267		0.948687759	72	0	2.000235239	4250	9	0	1	0	0
1268		0.563247403	43	0	0.627584103	13108	11	0	3	0	2
1269		0.521244129	63	0	0.501092657	4575	8	0	1	0	0
1270		0.30450088	57	0	0.780143485	4320	15	0	1	0	0
1271		0.040089758	85	0	0.014147564	5583	9	0	0	0	0
1272		1.629482072	47	1	0.33403156	7160	3	0	1	0	3
1273		0	50	0	0.517803141	10250	15	1	3	0	0
1274		0.765711714	36	0	0.652396418	10160	6	0	3	0	1
1275		0.018951779	38	3	0.555125725	1550	8	0	1	0	0
1276		0.9999999	58	0	1461	NA	6	2	0	2	3
1277		0.23092935	42	0	0.52334267	2141	5	0	0	0	0
1278		0.9999999	43	2	490	NA	1	0	0	0	0
1279		0.133793856	24	0	22	NA	7	0	0	0	NA
1280		0	72	0	0.007919747	1893	10	0	0	0	0
1281		0.9999999	42	2	0.140742129	5335	2	0	0	0	2
1282		0.203760385	82	0	0.089927711	10374	7	0	0	0	0
1283		0.263959391	52	1	0.219792271	15500	18	0	2	0	3
1284		0.98300085	37	0	0.383419689	11000	8	0	1	0	3
1285		0	74	0	0.235399285	1677	6	0	0	0	0
1286		0.164795292	83	0	0.020638349	8333	7	0	0	0	0
1287		0.336693754	65	0	0.216070308	15929	12	0	3	0	1
1288		0.896381269	60	1	0.333564783	7200	8	0	2	0	1
1289		0.136412682	63	0	0.46367262	5766	17	0	2	0	1
1290		0.346460272	51	0	1.049961568	1300	11	0	0	0	1
1291		0.132907077	47	0	0.447990771	5200	13	0	1	0	0
1292		0.945219291	32	0	0.324609734	2177	10	0	0	0	0
1293		0.216113494	62	1	0.198266832	10500	17	0	2	0	0
1294		0.9999999	59	2	0.493004664	1500	3	6	0	0	0
1295		0.9999999	77	0	0.37618746	3157	3	0	1	0	0
1296		0.005108585	67	0	0.130672926	2555	9	0	1	0	0
1297		0.9999999	69	0	0	1905	1	0	0	0	0
1298		0	67	0	0.018949458	68497	5	0	1	0	1
1299		0.005360334	67	0	0.146211647	9581	8	0	1	0	0
1300		0.9999999	25	0	0.195560888	1666	2	0	0	0	0
1301		0.258761754	79	0	1.160409556	2050	7	0	1	0	0
1302		0.012164926	52	0	1.154929577	3833	10	0	2	0	0
1303		0.0221707	36	2	0.661419753	3239	8	0	2	0	1
1304		0.683018545	27	0	0.395802099	2000	6	0	0	0	0
1305		0.002135686	49	0	0.133987239	10500	8	0	1	0	0
1306		0.020355424	81	0	0.298905283	2100	6	0	1	0	0
1307		0.783367395	51	0	0.038595726	4585	11	0	0	0	1
1308		0.023275289	63	0	28	NA	3	0	0	0	0
1309		0.021800882	39	0	0.613077385	5000	20	0	1	0	1
1310		0	39	0	0.113471632	4000	6	0	0	1	0
1311		0.036665648	68	0	0.015496126	4000	4	0	1	0	1
1312		0.097110835	75	0	553	NA	21	0	0	0	0
1313		0.669201121	51	0	1.199340033	6666	11	0	2	0	2
1314		0.064645118	30	0	0.011656953	1200	2	0	0	0	0
1315		0.998476263	62	0	0.395034101	9383	13	0	2	0	1
1316		0.386193569	56	0	0.33050997	11333	7	0	1	0	0
1317		0.9999999	28	1	0.280889621	1213	2	1	0	1	1
1318		0	47	0	0.006659267	900	9	0	0	0	0
1319		0.01221385	62	0	0.161393856	2180	8	0	0	0	0
1320		0.002547547	39	0	0.000891107	5610	9	0	0	0	0
1321		0	77	0	0	500	3	0	0	0	0
1322		0.193043023	42	0	0.077177736	4832	12	0	0	0	5
1323		0.515428928	49	0	0.473966145	4666	16	0	1	0	0
1324		0.077846022	42	1	2940	NA	7	0	1	0	0
1325		0.9999999	45	0	0.267523722	9800	4	0	1	0	2
1326		0.101359322	55	0	0.199837049	13500	15	0	1	0	2
1327		0.442950783	50	0	0.066030231	7541	5	0	0	0	1
1328		0.549782222	55	0	0.417058022	6600	9	0	1	0	1
1329		0.613524814	63	0	0.167035049	9500	4	0	1	1	1
1330		0.376888917	77	0	0.106937292	3300	5	0	0	0	1
1331		0	44	1	1988	0	7	0	1	0	2
1332		0.047211345	76	0	63	NA	7	0	0	0	NA
1333		0.57270458	42	0	0.26272212	15700	7	0	3	0	5
1334		0.090054905	51	0	0.858760826	1500	14	0	1	0	0
1335		0.96450355	47	0	0.294841032	3333	4	0	0	0	0
1336		0.711240398	32	0	0.51182939	3000	6	0	2	0	0
1337		0	53	0	2561	NA	9	0	1	0	0
1338		0.046728675	36	1	0.269484208	4400	6	0	1	0	3
1339		0.297963375	47	3	0.161253234	6957	11	0	1	1	0
1340		0.069508441	48	1	0.029732679	3665	5	0	0	0	0
1341		0.129455151	65	0	0.101547389	4135	12	0	0	0	1
1342		0.46973328	76	0	0.394660895	6929	8	0	1	0	0
1343		0.00079996	51	0	0.240256897	6850	4	0	1	0	2
1344		0.099656357	49	0	0.756897241	2500	13	0	2	0	2
1345		0.019998817	44	0	0.394835485	2400	6	0	0	0	3
1346		0.040940204	48	0	0.179504658	4400	9	0	1	0	2
1347		0.703651142	50	0	1.126197418	2400	3	0	1	0	0
1348		0.92822901	27	0	649	NA	3	0	0	0	0
1349		0.829186518	28	0	421	0	4	0	0	1	0
1350		0.000884257	45	0	4088	NA	8	0	1	0	0
1351		0.446116521	41	0	0.31846825	4125	6	0	0	0	0
1352		0.034830469	55	1	0.020638349	4166	12	0	0	0	0
1353		0.010070493	72	0	0.068887937	9333	9	0	0	0	1
1354		0.04141126	50	0	3033	NA	7	0	3	0	0
1355		0.005459219	63	0	0.312293924	57320	16	0	7	0	0
1356		0.281967832	44	0	0.190863641	10200	6	0	1	0	2
1357		0.548468582	29	0	0.302860061	1957	5	0	0	0	0
1358		0	54	0	0.233408671	4866	6	0	1	0	0
1359		0.116555709	43	0	0.300055772	3585	19	0	1	0	1
1360		0.022988863	75	0	0.004234252	15350	9	0	0	0	0
1361		1.185628743	65	1	0.002416833	7033	1	0	0	0	0
1362		0.068948198	80	0	1291	NA	13	0	1	0	0
1363		0.073502819	71	0	0.054914629	6500	8	0	0	0	0
1364		0.230407725	52	0	1004	1	9	0	2	0	0
1365		0.754272127	48	0	0.370584315	4500	4	0	0	0	2
1366		0.023765874	49	0	738	NA	5	0	1	0	0
1367		0	88	0	0.17010772	2227	2	0	0	0	0
1368		0.535459274	53	2	0.490626674	5600	19	0	1	0	0
1369		0.911537207	49	3	4.235619809	3250	26	0	0	1	0
1370		0.124546094	66	0	0.078777736	16133	8	0	0	0	0
1371		0.61558539	70	1	0.567197334	2700	9	0	1	0	0
1372		0.025994307	34	0	30	NA	3	0	0	0	0
1373		0.067903656	61	0	4062	NA	10	0	3	0	3
1374		0.146152938	40	1	0.117588933	7083	17	0	0	0	0
1375		0.511714747	52	0	0.74059262	5500	19	0	2	0	0
1376		0	47	0	0.521530463	7500	13	0	2	0	0
1377		1.01073138	56	2	0.203153408	33550	13	0	2	1	0
1378		0.03192888	55	0	0.608500717	5575	5	0	2	0	0
1379		0.272715152	87	0	0.017426082	7000	1	0	0	0	0
1380		0.008279347	82	0	9	NA	4	0	0	0	0
1381		0.386371779	44	0	0.340180772	6084	4	0	1	1	1
1382		0.186009264	32	1	0.435848607	4200	15	0	1	0	3
1383		0.9999999	71	0	0.24042455	8667	1	0	1	0	0
1384		0.008876112	57	0	2601	NA	7	0	1	0	0
1385		0	68	0	2.361884368	1400	7	0	1	0	1
1386		0.050612759	58	0	0.158335034	4900	6	0	1	0	1
1387		0.441587039	49	0	0.363998971	15543	14	0	2	0	2
1388		0.032741815	37	0	0.641701509	5500	4	0	2	1	0
1389		0.869193154	47	0	0.315314201	8083	10	0	2	0	0
1390		0.9999999	70	0	791	NA	4	0	0	0	0
1391		0.255100573	53	0	0.214352867	6381	9	0	1	0	2
1392		0	30	0	0.402688486	3421	6	0	1	0	0
1393		0.378936844	35	0	67	NA	3	0	0	0	0
1394		0.9999999	49	0	1.029628232	5298	7	0	4	0	0
1395		0.525342247	53	0	2540	NA	15	0	0	0	1
1396		0	57	1	0.103391337	7872	6	0	0	0	0
1397		0.011201903	61	1	0.308338332	5000	10	0	2	0	0
1398		0.294151511	52	0	0.268281191	10611	8	0	1	0	3
1399		0.013550136	35	1	0.051031835	6250	4	0	0	1	0
1400		0.02307897	51	2	0.291735413	13333	9	0	3	0	1
1401		0.049538414	47	0	0.499178491	6694	8	0	2	0	3
1402		0.098448379	48	0	0.013043478	10809	7	0	0	0	3
1403		0.187805842	37	0	0.226840741	10416	7	0	2	0	0
1404		0.9999999	40	0	0.360758175	4800	2	0	1	0	0
1405		0.007437035	40	0	0.506597361	2500	6	0	1	0	0
1406		0.040543791	43	0	0.192566579	10250	9	0	1	0	2
1407		0	31	1	0.002776235	1800	2	0	0	0	1
1408		0.550644936	50	0	0.286735504	11330	8	0	2	0	0
1409		0.232538408	47	0	0.329026304	4333	8	0	1	0	0
1410		0.205015912	51	0	0.289380217	11261	7	0	1	0	1
1411		0.073634807	35	0	1351	NA	8	0	1	0	0
1412		0.292335383	68	0	0.208526498	11000	6	0	1	0	1
1413		0.153327953	45	0	0.410732141	9000	7	0	1	0	3
1414		0.146975586	36	0	1052	NA	6	0	1	0	0
1415		0.08847257	62	0	0.317906118	7583	16	0	2	0	1
1416		0	36	0	3113	NA	8	0	2	0	0
1417		0.006889002	74	1	8.910518801	2100	12	0	0	0	0
1418		0.064444992	60	0	0.010186863	16000	4	0	0	0	0
1419		8.60199005	58	1	0.230402181	4400	10	2	0	0	0
1420		0.274245461	38	0	0.157168566	5000	13	0	1	0	0
1421		0.9999999	79	0	0	5000	1	0	0	0	0
1422		0.905540418	43	0	0.037485582	1733	3	0	0	0	0
1423		0.007627328	77	0	0.002667721	10120	6	0	0	0	0
1424		0.9999999	61	0	0.137191854	1865	3	0	0	0	1
1425		0.083876003	74	0	0.514418425	5166	7	0	2	0	0
1426		0	58	0	0.297789725	3347	5	0	1	0	1
1427		0	46	0	0.151893867	5200	8	0	0	0	2
1428		0.193668593	45	0	0.2728455	11533	12	0	2	0	2
1429		0.415075559	50	0	3823	NA	9	0	1	0	0
1430		0.240226971	59	0	0.19581749	1577	3	0	0	0	0
1431		0.696218998	52	1	0.590493601	9845	14	0	2	0	0
1432		0.017646851	52	0	0.041138156	5833	5	0	0	0	1
1433		0.18905406	45	0	0.275908031	3000	7	0	1	0	1
1434		0.068962583	84	0	0.014162077	5083	7	0	0	0	0
1435		0.111393536	43	0	0.210292484	13504	7	0	3	0	2
1436		0.433465842	55	5	0.457007817	5500	13	1	1	0	1
1437		0.072761973	40	0	0.434359119	7083	10	0	3	0	2
1438		0.026880275	77	0	0.124922696	1616	3	0	0	0	2
1439		0.03471244	54	0	1.16971831	1419	10	0	2	0	0
1440		1.072133637	29	2	0.111844908	4693	10	0	0	0	0
1441		0.051658667	57	0	0.287929803	9800	14	0	1	0	0
1442		0.010258179	49	0	4316	NA	8	0	2	0	0
1443		0.009051679	80	0	2	NA	2	0	0	0	0
1444		0.001387698	65	0	1.329468213	2500	12	0	2	0	0
1445		0.082441533	59	0	3454	NA	7	0	1	0	1
1446		0.988981117	57	3	0.922022279	3500	9	0	1	0	0
1447		0.993720046	44	0	0.435512897	1666	3	0	0	0	1
1448		0.112751298	51	0	0.040578687	5667	12	0	0	0	0
1449		0.138243088	82	0	82	NA	4	0	0	0	0
1450		0.097926805	64	0	1944	NA	4	0	1	0	0
1451		0.640395007	44	1	0.266933267	4000	10	0	1	0	2
1452		0.033027996	43	0	0.566912972	2435	6	0	1	0	3
1453		0.022374478	55	0	0.219105804	3600	7	0	0	0	0
1454		0.004925001	54	0	0.000832046	8412	3	0	0	0	0
1455		0.43270926	58	0	0.383200278	17285	24	0	2	0	2
1456		0.9999999	57	1	0.225864612	6100	8	0	0	1	0
1457		0.25373628	41	0	0.399961908	10500	9	0	2	0	2
1458		0.049145871	58	0	0.23423536	16000	11	0	2	0	1
1459		0.041841417	54	0	2391	NA	9	0	1	0	NA
1460		0.304570743	47	0	0.454632283	3140	3	0	1	0	0
1461		0.182333146	66	0	7338	NA	13	0	2	0	0
1462		0.057463986	31	0	32	NA	5	0	0	0	0
1463		0.9999999	43	0	0	1425	0	0	0	0	4
1464		0.100175552	59	0	1682	NA	4	0	1	0	0
1465		0.099548091	38	0	0.110551687	9334	3	0	1	0	1
1466		0.240814157	79	0	0.269576808	3000	9	0	1	0	0
1467		0.536219817	21	0	0.014063657	1350	1	0	0	0	0
1468		0.03116759	82	0	106	NA	5	0	0	0	0
1469		0.265734266	49	1	0.100482225	8916	9	0	1	1	4
1470		0.015926441	53	0	0.309121861	7048	7	0	1	0	2
1471		0	27	2	0.072231942	4000	7	0	0	0	0
1472		0.013892174	60	1	0.09563023	22586	7	0	3	0	1
1473		0	53	0	4591	NA	6	0	2	0	0
1474		0.429784975	76	0	0.092195345	2190	5	0	0	0	0
1475		0.202898551	53	0	0.397169811	4239	4	1	1	1	2
1476		1.185907046	28	0	0.36838391	1416	5	0	0	0	0
1477		0.450503807	45	0	0.048956084	4166	4	0	0	0	0
1478		0.046687851	63	0	0.044525547	8219	7	0	0	0	0
1479		0.346624282	52	1	0.568398311	10182	15	0	2	0	2
1480		0.266249642	63	0	0.418997669	5147	7	0	1	0	0
1481		0.029340886	44	0	0.06403107	20083	7	0	0	0	0
1482		0.372734107	59	1	0.475647035	9813	21	0	2	0	2
1483		0.084042641	81	0	30	NA	3	0	0	0	0
1484		0.003968304	60	0	0.204572804	5816	28	0	2	0	0
1485		0.0499002	26	2	0.415949512	1742	4	1	0	0	0
1486		1.01061484	43	4	0.761386538	2480	9	0	0	0	0
1487		0.472229224	45	0	0.57715648	4613	8	0	1	0	0
1488		0.000987088	56	0	0.265466203	14660	15	0	2	0	1
1489		0.9999999	45	0	0.087462587	6013	4	0	0	0	0
1490		0.224228139	39	0	0.085158434	8583	6	0	0	0	3
1491		0.146279901	55	1	0.324535876	9964	18	0	2	0	0
1492		0.252002406	39	0	0.780626366	6864	11	0	2	0	3
1493		0.16020653	59	0	0.324915825	2375	8	0	1	0	0
1494		0.196568149	37	0	0.580041996	10000	18	0	1	0	5
1495		0.706819129	53	0	0.617870478	7766	10	0	1	1	0
1496		0.176528419	48	0	0.300592868	11300	10	0	2	0	1
1497		0.008411702	49	0	1914	NA	12	0	1	0	0
1498		0.9999999	40	0	279	NA	1	0	0	0	0
1499		0	25	0	0	764	4	0	0	0	0
1500		0.171808752	69	0	0.376002042	19584	10	0	2	0	1
1501		0.868192711	35	0	1.525278492	3500	9	0	1	0	3
1502		0.001679325	36	1	0.439080131	7000	8	0	1	0	1
1503		0.910605931	45	0	0.626769359	4803	10	0	1	0	1
1504		0.311747746	37	1	904	NA	5	0	0	0	2
1505		0.03423328	64	0	17	NA	4	0	0	0	0
1506		0.244875512	58	0	0.441738871	6693	11	0	1	1	0
1507		0.177358218	57	0	0.69518149	4710	10	0	3	0	1
1508		0.497538316	40	0	0.461520999	8809	9	0	1	0	1
1509		0	31	0	0.519583676	3650	8	0	3	0	0
1510		0	53	0	7729	NA	4	0	2	0	0
1511		0.035606905	72	0	0.019986676	1500	5	0	0	0	0
1512		0.075556574	50	0	0.432509641	7000	18	0	3	0	1
1513		0.070717976	48	0	1.154276579	1250	5	0	1	0	2
1514		0.075219968	64	0	0.688540573	13333	8	0	3	0	1
1515		0.148485178	61	0	0.325410798	6815	10	0	1	0	1
1516		0.017673324	55	0	0.001440556	11800	5	0	0	0	0
1517		0.84007108	27	1	0.433439346	2200	7	0	0	0	0
1518		0.280609063	37	0	1.221219275	7200	28	0	4	0	1
1519		0.133190745	44	0	0.285102128	7000	6	0	0	0	5
1520		0.03520082	62	0	0.49168101	12200	16	0	6	0	0
1521		0.12074053	76	1	0.750865052	2600	12	0	2	0	0
1522		0.304539092	34	0	0.57018837	6104	10	0	2	0	0
1523		0.440763445	60	0	0.140924177	3916	3	0	1	0	0
1524		0.054426628	72	0	59	NA	2	0	0	0	0
1525		0.448994875	42	0	0.209558088	5000	14	0	0	0	0
1526		0.900199601	41	1	1004	NA	10	0	1	0	0
1527		0.840543964	41	0	11.70149254	267	6	0	2	0	0
1528		0.24048998	53	0	0.239765746	17416	9	0	5	0	0
1529		0.9999999	90	0	0	NA	0	0	0	0	NA
1530		0.301306687	28	0	0.002443901	4500	2	0	0	0	0
1531		0.033301618	66	0	0.988404638	2500	9	0	1	0	1
1532		0	53	1	425	NA	9	0	0	0	0
1533		1.099667774	22	0	0.003911343	2300	1	0	0	0	0
1534		0.831064941	45	0	0.271380111	5600	6	0	1	0	1
1535		0.094002091	55	0	0.314706891	8750	10	0	2	0	1
1536		0.001450326	28	0	0.111962679	3000	6	0	0	0	0
1537		1.097087379	71	2	170	NA	5	0	0	0	0
1538		0.007706603	55	0	0.464614154	2500	9	0	1	0	0
1539		0.00698648	61	0	1553	NA	5	0	1	0	NA
1540		0.137114515	74	0	0.021100538	4833	2	0	0	0	0
1541		0.882072766	58	1	1.075167627	8500	18	0	4	0	0
1542		0.001685204	65	0	0.474378411	6595	5	0	1	0	1
1543		0.358563956	37	0	0.176817899	22525	13	0	3	0	0
1544		0.423723812	51	0	0.37849944	6250	6	0	2	0	0
1545		0.15379231	76	0	521	NA	2	0	0	0	0
1546		0.038295587	64	0	1183	NA	9	0	2	0	0
1547		0.964226197	31	0	0.231880033	3600	5	0	0	0	2
1548		0.182265202	53	1	0.025487256	2000	4	0	0	0	0
1549		0.597045662	47	0	0.25850966	4347	18	0	0	0	0
1550		0.03578644	45	0	0.323243543	3600	13	0	1	0	3
1551		0.114293434	40	0	0.261780105	4583	6	0	1	0	1
1552		0.02639912	34	0	0.498000888	2250	5	0	1	0	2
1553		0.9999999	24	0	0.366645846	1600	3	0	0	0	0
1554		0.198483145	48	0	0.190988063	16000	19	0	1	0	2
1555		0.9999999	48	1	0.309462916	4300	2	2	0	1	0
1556		0.07947135	40	0	0.176420211	3502	6	0	0	0	1
1557		0.02829824	64	0	1844	NA	4	0	1	0	1
1558		0.9999999	46	1	0.139811601	4033	8	3	0	0	0
1559		0.872255489	27	0	0.266379506	4410	3	0	1	0	2
1560		0.198347107	44	1	0.365974809	5636	9	0	1	1	3
1561		0.210657889	59	0	701	NA	10	0	0	0	0
1562		0	68	0	0.128249072	3500	7	0	0	0	0
1563		0.837439785	45	0	2990	NA	8	0	1	0	0
1564		0.063110847	52	0	1237	NA	5	0	1	0	0
1565		0.063171166	67	1	0.490040797	4166	8	0	1	0	0
1566		0.115398077	54	0	0.84008884	1800	6	0	1	0	0
1567		0.073762477	91	0	0.019310565	6265	8	0	0	0	0
1568		0	63	0	0	NA	2	0	0	0	0
1569		0.281363274	52	0	0.342633929	7167	19	0	0	0	1
1570		0.863428166	48	2	0.967194697	8900	11	0	2	0	3
1571		0.066083098	56	0	0.236343543	6333	23	0	2	0	0
1572		0.515169021	67	0	0.533873029	4693	8	0	1	0	0
1573		0.443352039	43	0	0.285591848	10500	21	0	0	0	0
1574		0.019088138	60	0	0.005713742	10500	8	0	0	0	0
1575		0.072823025	50	0	0.08987178	8500	24	0	0	0	0
1576		0.364657108	63	0	0.289180991	8900	17	0	0	0	1
1577		0.025309287	73	0	0.236610331	4200	7	0	2	0	0
1578		0.049103144	40	0	0.922830868	2500	4	0	1	0	1
1579		0.017696569	46	0	0.298251402	6061	6	0	2	0	0
1580		0.010989736	52	0	0.002475955	10500	14	0	0	0	0
1581		0.020761414	82	0	0.12565445	7066	13	0	1	0	0
1582		0.022134843	43	0	0.004748813	4000	6	0	0	0	0
1583		0.002827489	75	0	0.076698541	9934	10	0	1	0	0
1584		0.02229777	58	0	0.000808952	7416	2	0	0	0	1
1585		0.114419236	43	0	0.071976967	2083	3	0	0	0	0
1586		1.111888112	22	0	384	NA	4	0	0	0	0
1587		0.9999999	28	0	0.033769523	2368	1	0	0	0	1
1588		0.9999999	42	1	117	NA	2	0	0	0	4
1589		0.02119415	47	0	0.079107752	8203	6	0	0	0	3
1590		0.024832816	74	0	34	NA	7	0	0	0	0
1591		0.380886481	50	0	0.258415842	4039	5	0	0	0	1
1592		0.00657751	61	0	0.26010707	5416	10	0	1	0	0
1593		0.089786685	67	0	0.223944208	5161	9	0	1	0	0
1594		0.9999999	55	2	1362	NA	2	0	2	0	0
1595		0.984778623	52	0	1.155261459	3097	12	0	1	0	1
1596		0.153137996	44	0	0.240143369	6416	6	0	1	0	2
1597		0	65	0	0.391071844	4300	7	0	1	0	0
1598		0.014799013	53	0	0.354258373	5224	5	0	1	0	3
1599		0.327986599	41	0	0.415892955	3661	6	0	1	0	0
1600		0.031926692	66	0	0.179636727	6000	5	0	2	0	0
1601		0.109390625	62	0	1273	NA	8	0	1	0	0
1602		0.092874317	65	0	0.216311665	9060	11	0	1	0	0
1603		0.881623675	58	0	0.264933767	4000	6	0	0	0	2
1604		0.008038152	42	0	0.330362244	8750	7	0	2	0	2
1605		0.120837217	44	0	0.063858152	7500	3	0	1	0	2
1606		0.333988085	48	0	0.518504742	5376	15	0	1	0	2
1607		0.333135088	54	0	724	NA	11	0	0	0	0
1608		0.492296082	37	0	0.333389859	17690	10	0	1	0	1
1609		0.267170802	33	0	0.198950262	4000	5	0	1	0	0
1610		0.013888295	44	0	0.247862607	13333	9	0	1	0	0
1611		0.302437465	57	0	0.406734127	11166	17	0	2	0	1
1612		1.00439912	31	0	0.198699716	2460	7	0	0	0	0
1613		0.443777821	69	0	0.607558966	3518	7	0	1	0	0
1614		0.271439527	52	0	1.227485463	7050	20	0	5	0	1
1615		0	65	0	328	NA	1	0	0	0	0
1616		1.036204744	54	2	0.136162433	10391	10	4	0	2	3
1617		1.185089974	44	1	0.203585589	5800	4	1	0	2	3
1618		0.282289926	60	0	0.261123146	6000	14	0	0	0	0
1619		0.157038324	50	0	0.292327366	7819	12	1	1	0	0
1620		0.864395666	41	1	0.973150528	3500	8	1	2	1	2
1621		0.745177883	44	2	0.100045372	8815	5	1	0	2	1
1622		0.775950749	67	0	4017	NA	18	0	1	0	0
1623		0.682653877	49	7	0.614110254	3500	12	1	2	2	1
1624		0.739167375	57	0	0.320820909	5700	3	0	1	0	0
1625		0.016892048	76	0	0.007679386	4166	6	0	0	0	0
1626		0	62	0	1134	NA	4	0	1	0	NA
1627		0.176341348	58	0	1.934199838	1230	8	0	1	0	0
1628		0	53	0	0.284337787	11000	11	0	1	0	0
1629		0	38	0	0	6350	1	0	0	0	2
1630		0.093050855	56	0	0.237288136	20000	9	0	1	0	1
1631		0.133599695	60	0	1118	NA	8	0	1	0	0
1632		0.943785489	71	6	2806	NA	19	0	2	0	0
1633		4.849191801	40	0	0.901582334	5750	11	0	2	0	1
1634		0.314043595	66	0	0.463804522	4378	11	0	1	0	0
1635		0.049513827	58	0	0.470882279	4000	6	0	1	0	1
1636		0.040439755	27	1	0.247068448	3666	9	0	0	0	0
1637		0.258217723	52	0	0.186213387	8500	4	0	1	0	0
1638		0	47	0	0.213986465	6205	5	0	1	0	1
1639		0.026518301	68	0	0.080639787	3000	7	0	0	0	0
1640		0.036425726	57	1	0.446976475	19000	13	0	4	0	3
1641		0.010224744	52	0	0.31090175	11144	6	0	1	0	1
1642		0.037714627	82	0	0.007999	8000	7	0	0	0	0
1643		0	46	0	0.028110359	1920	7	0	0	0	1
1644		0	38	0	0.338330835	2000	13	0	1	0	0
1645		0.06212945	49	0	1299	NA	5	0	1	0	0
1646		0.017135974	62	0	22	NA	7	0	0	0	0
1647		0.9999999	22	98	0	2100	0	98	0	98	0
1648		0.237493189	82	1	0.456257242	6903	20	0	2	0	0
1649		0.070949851	44	0	0.339851128	9000	16	0	3	0	4
1650		0.728609233	37	0	2860	NA	4	0	2	0	0
1651		0.9999999	37	2	0.001886437	5300	4	2	0	0	0
1652		0.00939561	63	0	0.003499417	6000	10	0	0	0	0
1653		0.127307301	50	0	0.072115986	8000	6	0	0	0	0
1654		0.819482153	69	1	2712	NA	12	0	2	0	0
1655		0.003499883	79	0	0.356454721	7784	6	0	3	0	0
1656		0.001829748	66	0	0.000190458	10500	7	0	0	0	0
1657		0.043430398	62	0	0.137714571	18000	6	0	1	0	0
1658		0.29948078	51	0	0.139711039	7128	6	0	0	0	0
1659		0.341379482	42	0	0.392319668	5780	8	0	1	0	4
1660		0.794123776	56	3	0.957289579	7983	7	1	2	0	1
1661		0	51	1	0.406647743	10920	7	0	2	0	2
1662		0.873754384	49	0	0.477053824	5294	20	0	2	0	0
1663		0.110026176	60	0	0.358773538	6000	7	0	2	0	0
1664		0.9999999	32	0	1548	NA	2	0	1	0	0
1665		0.275241586	26	0	0.011994003	2000	3	0	0	0	0
1666		0.070552643	40	0	2481	NA	6	0	2	0	0
1667		0.084797577	42	0	0.27930378	3676	4	0	1	0	1
1668		0.019656768	46	3	1.168532283	11166	7	0	4	0	0
1669		0.02879952	70	0	0.372450204	4166	9	0	1	0	0
1670		0.005686089	69	0	1178	NA	5	0	1	0	0
1671		0.039471796	64	0	0.238974871	6008	9	0	2	0	0
1672		0.180490975	38	0	0.114494519	3283	4	0	0	0	1
1673		0.107981441	64	0	0.363475491	5650	25	0	2	0	0
1674		0.9999999	32	0	209	NA	4	1	0	0	0
1675		0	63	0	202	NA	6	0	1	0	0
1676		0.9999999	35	0	0.178170299	10416	3	0	2	0	0
1677		0.000872472	74	0	0.359090909	4179	7	0	1	0	0
1678		2.139534884	26	0	0.01518785	1250	0	1	0	0	0
1679		0.131608411	47	0	0.319468885	6250	10	0	2	0	0
1680		0.127008269	75	0	0.177227847	8000	8	0	1	0	0
1681		0.493920562	57	9	0.379793572	11916	15	0	2	2	0
1682		0.039083803	27	1	0.606936416	864	5	0	0	0	0
1683		0	30	0	0.009497626	4000	1	0	0	0	2
1684		0.29540981	50	0	0.479595396	8600	7	0	1	0	2
1685		0	76	0	0.357576908	5265	8	0	1	0	0
1686		0.582270903	59	0	0.456706507	7529	9	0	3	0	2
1687		0.038846724	56	0	0.506383633	6500	7	0	2	0	0
1688		0.093879738	42	1	0.185757138	9000	10	0	1	0	0
1689		0.31432834	37	2	0.270254374	6800	14	0	2	0	1
1690		0.62828748	54	2	0.295543128	5900	4	0	1	0	0
1691		0.537460622	48	0	672	NA	2	0	1	0	0
1692		0.168370791	57	0	0.2971735	8950	6	0	1	0	0
1693		0.9999999	55	1	0.110732925	4406	1	0	0	0	0
1694		0.222777758	54	1	0.461722131	6700	15	0	2	0	1
1695		0.10839729	81	1	0.051979208	2500	5	0	0	1	0
1696		0.086265405	42	1	0.676542777	5703	9	0	1	0	0
1697		0.205840404	67	0	0.418120117	12670	12	0	3	0	1
1698		0.304431916	51	0	0.618659099	2818	6	0	1	0	2
1699		0.9999999	33	0	0.002726034	2200	1	0	0	1	0
1700		0.576880112	44	0	0.226943264	4000	3	0	0	0	4
1701		0.22332631	55	0	0.14998256	8600	7	0	1	0	0
1702		0.365726855	40	0	0.205711736	2240	2	0	0	0	0
1703		0.008564803	72	0	0.105369251	5456	8	0	0	0	0
1704		0.192157376	60	2	0.621066815	12616	21	0	7	0	0
1705		0.00921351	83	0	0.309793471	3001	11	0	1	0	0
1706		0.302169783	68	0	0.731922809	4300	6	0	1	0	0
1707		0.9999999	49	0	1002	NA	3	0	1	0	NA
1708		0.128305409	47	0	0.162879755	7833	4	0	1	0	0
1709		0.02980639	50	0	1211	NA	8	0	1	0	0
1710		0.576088951	46	0	0.384315524	4360	5	0	0	0	1
1711		0.388522571	47	0	0.993002333	3000	12	0	2	0	2
1712		0.05980374	73	0	0.371458552	1905	8	0	0	0	0
1713		0.9999999	44	0	0.790041992	5000	10	0	2	0	2
1714		0.015319961	36	0	0.327334533	5000	5	0	1	0	0
1715		0.051664945	66	0	46	NA	2	0	0	0	0
1716		0.001264936	60	0	1462	NA	8	0	1	0	2
1717		0.604688628	33	0	0.43134715	4631	6	0	2	0	0
1718		0.875556167	49	3	0.4258	4999	14	0	0	1	0
1719		0.097028218	81	0	0.097359211	22000	5	0	2	0	0
1720		0	58	0	0.304153196	8041	7	0	1	0	2
1721		0.9999999	40	0	0.863465006	6100	9	0	3	0	2
1722		0.207724101	42	0	1654	NA	7	0	1	0	0
1723		0.911976157	65	0	0.177121162	18173	11	0	1	0	1
1724		0.067801799	79	0	0.024592131	8335	5	0	0	0	0
1725		0.335062033	48	0	0.896502498	1400	5	0	0	0	0
1726		0.372284448	72	0	0.284160928	2758	10	0	1	0	0
1727		0.9999999	94	0	4	NA	4	0	0	0	0
1728		0.9999999	50	0	0.018908933	4600	0	1	0	0	0
1729		0.028537537	71	0	0.009891357	6166	4	0	0	0	0
1730		0.033106251	69	0	24	NA	5	0	0	0	NA
1731		0.9999999	72	0	0.138056312	1100	5	0	1	0	0
1732		0.386508471	35	0	0.448193111	7083	6	0	1	0	0
1733		0.008660214	68	1	0.104291071	7200	13	0	1	0	1
1734		0.071655096	49	0	0.62245918	3000	6	0	1	0	0
1735		0.923788933	57	1	0.42902028	3500	19	0	0	0	0
1736		0.9999999	55	0	1139	NA	10	1	0	0	0
1737		0.39514708	55	0	0.391103651	7148	9	0	2	0	2
1738		0.826356044	41	1	0.508388876	4350	8	0	2	0	0
1739		0.254129467	54	0	4332	NA	16	0	2	0	0
1740		0.850349824	45	0	0.103224336	8776	5	0	0	0	0
1741		0.005067037	77	0	0.112724758	5783	4	0	0	0	1
1742		0.9999999	25	0	0	764	1	0	0	0	0
1743		0.192578692	59	0	1.032741815	4000	8	0	1	0	1
1744		0.785316439	53	0	0.190939918	11500	8	0	0	0	0
1745		0.019564934	60	0	0.367731217	10833	11	0	3	0	0
1746		0.760953113	35	1	0.024300215	3250	3	1	0	0	2
1747		0.078896264	78	0	0.28761307	5416	13	0	1	0	0
1748		0.390146471	26	0	0.151769646	5000	8	0	0	0	0
1749		0.060398274	55	0	1594	NA	9	0	1	0	0
1750		0	64	0	0.266953235	13492	12	0	4	0	0
1751		0.119075237	55	0	2491	NA	4	0	2	0	1
1752		0.062378972	55	0	0.139222206	6916	3	0	1	0	3
1753		0.088434937	39	0	15.11940299	200	9	0	2	0	0
1754		0.041919122	53	0	0.083822297	5964	8	0	1	0	2
1755		0.706892076	50	0	0.639257719	6250	13	0	2	0	0
1756		0.9999999	42	1	0.101029447	4176	2	4	0	0	0
1757		0.091209326	62	0	0.167565217	22999	14	0	3	0	1
1758		0.255554134	61	0	0.205481182	7917	9	0	1	0	0
1759		0.193757677	55	0	1.066431511	1700	9	0	2	0	0
1760		0.01077507	56	0	0.007139457	2100	5	0	0	0	0
1761		0.025068518	37	0	0.349851027	6376	14	0	1	0	0
1762		0.006449678	50	0	0.304410621	9000	4	0	1	0	0
1763		0.026021229	83	0	0.013404826	3729	4	0	0	0	1
1764		0.009633396	42	0	0.511248125	6000	10	0	2	0	3
1765		0.002277171	90	0	2	NA	3	0	0	0	0
1766		0.895465027	27	0	0.014461931	2350	2	0	0	0	1
1767		0.9999999	45	1	15325	0	2	0	0	1	0
1768		0.883779055	45	0	0.426905456	2400	5	0	1	0	0
1769		0.055597529	59	0	0.00719856	5000	3	0	0	0	0
1770		0.00223168	50	0	0.287949922	5750	9	0	1	0	2
1771		0.271626341	44	1	0.099780044	5000	4	1	0	0	0
1772		0	49	0	0.056843116	14583	8	0	0	0	0
1773		0.9999999	47	1	0	NA	3	1	0	0	0
1774		0.019331207	71	0	1.129372571	1800	19	0	1	0	0
1775		0.037605324	43	0	0.004990459	6812	2	0	0	0	0
1776		0.156742163	63	0	0.15498591	11000	5	0	1	0	2
1777		0.395471747	60	0	0.316056462	4533	15	0	1	0	2
1778		0.28968104	57	0	0.571383943	3200	14	0	1	0	0
1779		0.705572221	27	0	0.150525419	3520	10	0	0	0	0
1780		0	59	0	289	NA	2	0	0	0	0
1781		0.279736417	40	0	2990	NA	12	0	2	0	3
1782		0.013275686	63	0	0.347459791	3916	17	0	2	0	0
1783		0.136558729	64	1	665	NA	5	0	1	0	0
1784		0.06601868	55	0	0.361695991	10400	7	0	2	0	2
1785		0.9999999	23	0	0	NA	0	0	0	0	NA
1786		0.057998804	65	0	1337	NA	9	0	1	0	0
1787		0.000367163	66	0	0.006306722	6500	4	0	0	0	0
1788		0.63184775	59	0	3487	NA	10	0	2	2	2
1789		0.048359731	80	0	151	NA	6	0	0	0	0
1790		0	27	0	41	NA	4	0	0	0	0
1791		0.001329086	46	0	0.234927357	17000	9	0	2	0	2
1792		0.9999999	33	0	0.323335333	5000	5	0	1	0	2
1793		0.018932071	30	0	0.184160305	4191	9	0	0	0	1
1794		0.381345792	32	0	0.229270815	5800	8	0	0	0	0
1795		0.937804303	62	0	0.246523639	5033	4	0	0	0	1
1796		0.272351955	46	0	0.184950291	5833	2	0	1	0	2
1797		0.107741022	68	0	1563	NA	3	0	1	0	0
1798		0.407518496	33	0	0.21627409	1400	2	0	0	0	2
1799		0.52079756	52	1	0.321096474	10323	10	0	1	1	2
1800		0.016193572	48	0	0.008159565	7720	8	0	0	0	0
1801		0.9999999	59	0	7084	NA	8	0	1	0	2
1802		0.022289604	28	0	0.11161607	5500	7	0	0	0	0
1803		0.206862071	77	0	104	NA	5	0	0	0	NA
1804		0	85	0	0	2800	4	0	0	0	0
1805		0.013276539	74	1	0.114967306	13916	7	0	1	0	0
1806		0.9999999	37	0	0.166466707	3333	4	0	0	0	0
1807		0.43130458	29	0	194	NA	3	0	0	0	0
1808		0.614300408	40	0	0.231415737	6900	10	0	1	0	1
1809		0.220955809	64	0	33	NA	3	0	0	0	NA
1810		2.513480763	57	2	0.229461756	6000	7	1	1	2	1
1811		0.661718329	65	0	1.628914057	1500	7	0	1	0	0
1812		0.142135048	49	0	0.869301649	4123	9	0	2	0	0
1813		0.151185544	40	0	1.749583565	1800	7	0	2	0	2
1814		0	42	0	0.074552392	3406	9	0	0	0	0
1815		0.510640816	43	0	0.202073081	9550	8	0	1	0	2
1816		0.18436649	51	2	0.110059329	15000	7	0	2	0	0
1817		0.036192201	77	0	0.318350633	10500	35	0	2	0	0
1818		0	50	0	0	NA	2	0	0	0	NA
1819		0.295112452	63	0	0.373750227	5500	11	0	1	0	0
1820		0.9999999	64	0	702	NA	4	0	0	0	0
1821		0	58	0	0.142662674	3672	6	0	1	0	1
1822		0.014963413	68	0	0.124906258	12000	9	0	1	0	0
1823		0.23097982	54	0	0.914003701	8104	10	0	2	0	0
1824		0.047246177	58	0	980	NA	3	0	1	0	0
1825		0.950170347	61	0	0.546028104	3486	6	0	0	0	0
1826		0.582367236	88	0	0.686067019	2267	9	0	0	0	0
1827		0.044369225	30	0	0.180733254	9300	11	0	1	0	0
1828		0.305377801	35	0	0.380385237	6800	9	0	1	0	0
1829		0.432015351	45	0	0.438726398	2700	9	0	0	0	0
1830		0.362387247	92	0	0.312990801	4456	9	0	0	0	1
1831		0.9999999	44	0	0.647684786	3476	2	2	1	1	3
1832		0.453724865	64	0	4876	NA	21	0	1	0	1
1833		0.130627082	53	0	0.26125659	11570	18	0	3	0	0
1834		0.9999999	29	0	0.15485408	1678	1	1	0	0	1
1835		0.9999999	29	0	0.024877935	4300	0	2	0	0	3
1836		0.128633691	53	1	0.335688333	9907	18	0	1	0	3
1837		0.511117014	55	0	0.585944196	10500	10	0	3	0	2
1838		0.157893607	55	0	0.532528339	8115	12	0	1	0	0
1839		0.678101369	48	0	0.874890639	8000	11	0	3	0	0
1840		0.054301229	76	0	0.486128237	3243	8	0	1	0	2
1841		0.040838389	50	0	3853	0	21	0	2	0	2
1842		0	57	0	0	2505	3	0	0	0	0
1843		0.9999999	49	0	0.441748508	5192	4	0	2	0	2
1844		0.000370169	50	1	0.359697845	4500	7	0	1	0	3
1845		0.310281952	67	0	724	NA	15	0	0	0	0
1846		0.9999999	48	0	0.138694094	6416	4	0	0	0	2
1847		0.9999999	50	0	0.129526772	4500	3	1	1	0	0
1848		0	45	0	0.610677864	5000	8	0	2	0	2
1849		0.355612456	60	1	0.222097238	8000	4	0	1	0	4
1850		0.337501579	41	0	0.357264274	10000	19	0	1	0	2
1851		0	41	0	0	NA	2	0	0	0	0
1852		0	41	0	0.425514897	5000	8	0	2	0	2
1853		0.302720823	61	0	0.477212682	6055	7	0	1	0	0
1854		0	28	0	0	3738	2	0	0	0	0
1855		0.562639269	43	0	0.525316973	12224	14	0	1	0	1
1856		0.048917597	62	0	0.583910168	6500	10	0	2	0	0
1857		0.035177674	77	0	0.326224592	3000	7	0	1	0	0
1858		0	52	0	0.450024498	4081	10	0	1	0	1
1859		0.9999999	25	0	0.02330806	3560	1	0	0	0	1
1860		0.03627077	42	1	0.254136412	8400	18	0	2	0	2
1861		0.772764894	57	0	0.684486822	9333	11	0	2	0	0
1862		0.330031752	32	0	0.504679626	4166	9	0	1	0	0
1863		0.780724899	43	1	0.75224955	5000	6	0	3	2	1
1864		0.004270913	38	0	9	NA	5	0	0	0	0
1865		0.088710097	52	0	2154	NA	9	0	1	0	0
1866		0.9999999	32	0	0.047379032	7935	3	0	0	0	1
1867		0.804952086	32	0	0.173414194	6100	6	0	0	0	1
1868		0	66	0	0.185775063	18333	4	0	1	0	2
1869		0.087197828	67	0	0.277516954	5750	11	0	1	0	0
1870		0	42	0	0.125609299	5333	7	0	1	1	1
1871		0.099887072	63	0	0.337011885	2355	12	0	1	0	0
1872		0.277234037	37	0	0.613835726	10031	14	0	2	0	1
1873		0.016666374	77	0	0.00659868	5000	13	0	0	0	1
1874		0.067531365	35	0	0.314350797	3950	7	0	1	0	0
1875		0.103968503	56	4	0.386902912	9650	16	0	1	0	5
1876		0.001484684	61	2	0.233881163	8700	8	0	1	0	1
1877		0.00148933	80	0	0.175444716	8600	8	0	1	0	0
1878		0.031953093	50	0	0.153230229	9116	9	0	3	0	0
1879		0.034823543	60	0	1570	NA	4	0	1	0	0
1880		0.808435144	31	0	1.291902699	3000	8	0	2	0	0
1881		0.9999999	76	0	0.146909091	2749	1	0	0	0	0
1882		0.083971382	61	0	0.016375546	3663	6	0	0	0	0
1883		0.080663306	34	0	778.5	1	10	0	1	0	0
1884		0.9999999	47	0	4	NA	1	0	0	0	0
1885		0.508196721	43	1	0.44036432	6916	9	0	1	0	2
1886		0.17888722	54	0	599	NA	5	0	0	0	0
1887		0.986006997	54	5	0.346793349	3367	12	0	1	0	1
1888		0.003999805	30	0	0.186081694	1321	2	0	0	0	0
1889		1.005635339	46	0	0.283656234	2012	3	0	0	0	1
1890		0.036864126	40	2	3282	NA	15	0	2	0	0
1891		0.002795617	63	0	0.151457741	9500	17	0	1	0	0
1892		0.041797862	68	0	0.005868927	6133	6	0	0	0	0
1893		0.152440687	89	0	50	NA	1	0	0	0	NA
1894		0.022252085	78	0	16	NA	5	0	0	0	0
1895		0.841989759	65	1	1660	NA	4	0	1	0	NA
1896		0.029010351	79	0	0.014727081	25666	8	0	0	0	1
1897		0.9999999	40	0	0.649408887	2452	5	0	1	0	2
1898		0.9999999	62	0	0.367945824	3100	3	0	1	0	1
1899		0.026369964	45	0	0.349437734	2400	4	0	1	0	2
1900		0.182551962	49	0	0.063357225	11300	14	0	0	0	0
1901		0.108691947	60	0	0.640266614	5100	14	0	3	0	2
1902		0.931283883	53	0	6962	NA	16	0	2	0	0
1903		0.335837404	62	1	3934	NA	16	0	1	0	0
1904		0.657342657	23	0	411	NA	2	0	0	0	0
1905		0.229021482	70	0	1711	NA	7	0	1	0	NA
1906		0	59	0	0.128478587	6000	7	0	1	0	0
1907		0.162786896	58	0	0.286574119	10300	9	0	1	0	1
1908		0.016512233	89	0	1.137229987	2360	10	0	2	0	0
1909		0.025090581	43	0	0.559088182	5000	25	0	2	0	0
1910		0.227418435	38	0	0.707005284	5866	14	0	3	0	1
1911		0.756496172	42	0	0.72631842	4000	10	0	1	0	2
1912		0.00255168	47	0	0.325278617	9600	9	0	1	0	0
1913		0.166433338	68	0	0.33281768	4524	17	0	0	0	0
1914		0.114015131	64	1	2169	NA	6	0	1	0	0
1915		0.216726688	52	0	0.462107578	5000	19	0	1	0	1
1916		0.151283351	40	0	4491	NA	6	0	3	0	0
1917		0.9999999	61	0	0.158959538	7265	1	0	1	0	1
1918		0.998857469	36	0	0.288489003	3500	4	0	1	0	2
1919		0.005020013	61	1	0.467535755	7900	23	0	2	0	3
1920		0.9635145	29	2	0.166888593	6758	4	1	0	1	0
1921		0.458844033	77	1	0.169671262	2828	5	0	0	0	0
1922		0.87245456	43	0	0.528954424	7459	12	0	2	0	2
1923		0.9999999	39	0	0.091863984	5616	3	2	0	0	1
1924		0.9999999	45	0	0.837361878	2895	9	0	1	0	2
1925		0.9999999	24	98	0.008384392	3100	0	98	0	98	1
1926		0.05493548	45	0	0.692475124	3215	7	0	2	0	0
1927		0	38	0	1.658208381	2600	4	0	1	0	0
1928		0.992890469	29	0	1330	NA	3	0	0	0	3
1929		0.674484138	49	0	0.455708858	5000	7	0	2	0	0
1930		0.9999999	39	0	0	NA	0	0	0	0	0
1931		0	43	0	0.387329014	12500	9	0	2	0	2
1932		0.609732077	53	1	0.103814013	9333	4	1	0	0	0
1933		0.058578452	36	0	0.267195767	3401	7	0	1	0	3
1934		0.294881069	33	0	1.465290807	2131	5	0	2	0	0
1935		1	48	0	0.138763198	5966	2	0	0	0	1
1936		0.025513805	78	0	0.097564909	6200	16	0	0	0	0
1937		0	32	2	0.157357357	1664	2	0	0	0	1
1938		0	81	0	6	NA	7	0	0	0	NA
1939		0.046700664	44	0	0.1751677	7900	15	0	0	0	0
1940		0.00462031	36	0	0.153557114	7983	9	1	2	0	0
1941		0.006499904	54	0	0.361773154	12880	9	0	3	0	1
1942		0.021399144	59	0	0.174370208	4564	6	0	1	1	0
1943		0.310313494	30	0	84	NA	3	0	0	0	0
1944		0.061131296	55	0	0.577839335	1804	4	0	2	0	0
1945		0	35	0	0.165289256	3750	5	0	0	0	0
1946		0.045548861	42	0	0.079513299	3533	5	0	0	1	1
1947		0.013670863	75	0	0.071310614	6660	5	0	1	0	0
1948		0.048582411	41	0	0.419364275	10255	13	0	1	0	4
1949		0.024798438	59	0	2050	NA	9	0	1	0	0
1950		0.322781964	63	0	0.689814815	4103	14	0	2	0	2
1951		0	43	0	0.075984803	5000	2	0	0	0	4
1952		0.287372509	40	0	0.298260622	3506	15	0	1	0	0
1953		0.243250166	46	0	0.075551358	18000	12	0	0	0	2
1954		0.002962046	78	0	0.001043978	7662	10	0	0	0	0
1955		0.000154736	30	0	0.165133946	2500	6	0	0	0	0
1956		0.9999999	46	0	0.00017854	5600	3	0	0	0	2
1957		0.061439707	45	0	1839	NA	10	0	1	0	3
1958		0.040627411	82	0	0.221364221	3107	18	0	1	0	0
1959		0.443340549	76	0	716	NA	7	0	0	0	0
1960		0.146761775	40	0	0.230868478	12400	7	0	2	0	3
1961		0.533453031	33	0	0.121514281	5916	5	0	0	0	0
1962		0.01755771	78	0	2467	NA	14	0	2	0	NA
1963		0.228835349	33	0	72	NA	2	0	0	0	0
1964		0.731148126	31	0	0.21684291	7848	14	0	0	0	0
1965		0.278848077	77	0	0.019574021	13333	4	0	0	0	0
1966		0.31055891	59	0	1102	NA	24	0	0	0	0
1967		0.813020775	62	3	0.044246914	10124	4	0	0	1	0
1968		0.532297669	38	1	0.399920016	5000	13	0	0	1	0
1969		0.05039874	84	0	0.006323777	9487	7	0	0	0	0
1970		0.013133529	57	0	0.096481271	12333	9	0	2	0	0
1971		0.052782253	70	0	0.009388367	18000	8	0	0	0	0
1972		0.013261977	52	0	0.213059858	7166	9	0	1	0	0
1973		0.27288576	34	0	0.034895355	72960	12	0	1	0	0
1974		0.491355631	50	0	0.379329654	12500	19	0	3	0	2
1975		0.002471178	50	0	0.267146571	5000	11	0	1	0	0
1976		1.158380318	59	0	0.222432432	7399	8	0	1	3	0
1977		0.026512576	64	0	0.11026878	2901	7	0	0	0	0
1978		0.007374802	56	0	0.000699986	50000	13	0	0	0	3
1979		0.9999999	33	2	1457	NA	3	0	1	0	1
1980		0.001228886	35	0	1	0	6	0	0	0	0
1981		0	70	0	5	NA	7	0	0	0	0
1982		0.40790122	27	0	551	0	6	0	0	1	0
1983		0.061051516	27	0	0.008660893	1500	3	0	0	0	0
1984		0.550838325	45	0	0.393587099	5332	11	0	4	0	0
1985		0.08971682	57	0	0.361727392	16000	19	0	3	0	0
1986		0.191345313	57	0	0.202177294	4500	12	0	1	0	0
1987		0.548254385	73	0	0.429579535	3400	6	0	2	0	0
1988		0.548998339	48	1	0.35306351	6250	6	0	1	0	0
1989		0.02970297	69	1	0.013633265	2933	1	0	0	0	0
1990		0.346102569	31	0	0.127429806	4166	5	0	0	0	1
1991		0.932092861	55	0	0.444052345	6800	5	1	2	1	0
1992		0	66	0	2653	NA	7	0	1	0	0
1993		0.774408093	56	1	3259	NA	11	1	2	0	1
1994		0.844930746	56	0	2586	NA	13	0	1	0	0
1995		0.673504371	57	0	3.920204978	1365	10	0	1	0	0
1996		0.089213512	69	0	0.008631668	7066	2	0	0	0	0
1997		0.9999999	82	0	0.082882749	13500	6	0	1	0	0
1998		0.045196987	66	0	0.774756987	6583	11	0	3	0	1
1999		0.246500111	76	0	1.037255793	2200	9	0	1	0	0
[truncated: 99,504 more rows]
