# Supplementary material
Source: ML conference proceedings conference paper supplement (https://proceedings.mlr.press/v139/miller21a.html)
Supplement: Supplementary file 3 [file miller21a-supp.zip › supp/kaggle_data/cs-training.csv]

	SeriousDlqin2yrs	RevolvingUtilizationOfUnsecuredLines	age	NumberOfTime30-59DaysPastDueNotWorse	DebtRatio	MonthlyIncome	NumberOfOpenCreditLinesAndLoans	NumberOfTimes90DaysLate	NumberRealEstateLoansOrLines	NumberOfTime60-89DaysPastDueNotWorse	NumberOfDependents
1	1	0.766126609	45	2	0.802982129	9120	13	0	6	0	2
2	0	0.957151019	40	0	0.121876201	2600	4	0	0	0	1
3	0	0.65818014	38	1	0.085113375	3042	2	1	0	0	0
4	0	0.233809776	30	0	0.036049682	3300	5	0	0	0	0
5	0	0.9072394	49	1	0.024925695	63588	7	0	1	0	0
6	0	0.213178682	74	0	0.375606969	3500	3	0	1	0	1
7	0	0.305682465	57	0	5710	NA	8	0	3	0	0
8	0	0.754463648	39	0	0.209940017	3500	8	0	0	0	0
9	0	0.116950644	27	0	46	NA	2	0	0	0	NA
10	0	0.189169052	57	0	0.606290901	23684	9	0	4	0	2
11	0	0.644225962	30	0	0.30947621	2500	5	0	0	0	0
12	0	0.01879812	51	0	0.53152876	6501	7	0	2	0	2
13	0	0.010351857	46	0	0.298354075	12454	13	0	2	0	2
14	1	0.964672555	40	3	0.382964747	13700	9	3	1	1	2
15	0	0.019656581	76	0	477	0	6	0	1	0	0
16	0	0.548458062	64	0	0.209891754	11362	7	0	1	0	2
17	0	0.061086118	78	0	2058	NA	10	0	2	0	0
18	0	0.166284079	53	0	0.18827406	8800	7	0	0	0	0
19	0	0.221812771	43	0	0.527887839	3280	7	0	1	0	2
20	0	0.602794411	25	0	0.065868263	333	2	0	0	0	0
21	0	0.200923382	43	0	0.430046338	12300	10	0	2	0	0
22	1	0.025655677	38	0	0.475841386	3000	7	0	1	0	2
23	0	0.9999999	39	0	0.241103559	2500	4	0	0	0	0
24	0	0.075426584	32	0	0.085512189	7916	6	0	0	0	0
25	0	0.04656027	58	0	0.241621845	2416	9	0	1	0	0
26	1	0.392248482	50	0	1.595253368	4676	14	0	3	0	1
27	0	0.052436094	58	0	0.097672186	8333	22	0	1	0	0
28	0	0.034421473	69	0	0.042383047	2500	17	0	0	0	1
29	0	0.452515828	24	0	0.011761247	3400	1	0	0	0	0
30	0	0.392994586	58	2	0.436102527	5500	15	0	1	0	0
31	0	0.704073982	28	1	0.155201143	4200	8	0	0	0	0
32	0	0.9999999	24	0	0.472703063	750	1	0	0	0	0
33	0	0.083418009	62	0	977	NA	6	0	1	0	0
34	0	0.186868556	57	0	0.313812313	7000	9	0	2	0	0
35	0	0.693329681	42	2	0.257731959	2230	7	0	0	0	0
36	0	0	64	0	0.073538769	11000	9	0	1	0	0
37	0	0.881836362	50	3	0.567858035	4000	9	0	1	0	1
38	0	0.9999999	75	1	0.134078212	3400	1	0	1	0	1
39	0	0.363636364	26	0	0.00999001	1000	1	0	0	0	0
40	0	0.304490668	52	0	0.808340474	3500	10	0	2	0	0
41	0	0.71998531	41	1	0.539554464	5700	14	0	1	0	0
42	0	0.07289757	81	0	75	NA	7	0	0	0	0
43	0	0.469056842	31	0	0.048211004	9250	4	0	0	0	1
44	0	0.718705378	28	0	0.170125614	3661	4	0	0	0	1
45	0	0.368875933	68	0	1687.5	1	31	0	1	0	0
46	0	0.000602723	70	0	0.177787036	16800	12	0	1	0	2
47	0	0.061440132	62	0	0.011167837	3133	2	0	0	0	0
48	0	0.140110634	31	0	0.689370485	1937	4	0	2	0	0
49	0	0.834048027	38	0	0.393662026	13000	13	0	2	0	2
50	0	7.96E-05	70	0	0.256339661	6900	21	1	1	0	0
51	0	0.818977517	73	0	3095	0	9	0	1	1	0
52	1	0.728150491	31	0	0.824725092	3000	10	0	2	0	1
53	0	0.9999999	62	0	0	NA	1	0	0	0	0
54	0	0.028562367	51	0	0.306381499	5750	5	0	1	0	0
55	0	0.992015968	29	0	0.008064516	2231	1	0	0	0	0
56	0	0.070853769	55	0	0.073147745	13793	4	0	1	0	0
57	0	0.454971915	46	1	0.016921775	13000	10	0	0	0	1
58	0	0.401199782	64	0	0.351258937	3216	4	0	1	0	0
59	0	0.541108804	43	0	2477	NA	3	0	1	0	2
60	0	0.655569945	35	0	0.261609907	5813	10	0	0	0	2
61	0	0.651603452	58	0	0.241135663	7783	11	0	1	0	0
62	0	0.027399502	69	0	0.00803428	5600	3	0	0	0	0
63	0	0.101155821	72	0	1720	NA	12	0	2	0	0
64	0	0.009788862	46	0	1.051397656	3326	6	0	2	0	2
65	0	0.337520702	60	0	0.549877805	4500	10	0	2	0	0
66	0	0	67	0	0.540983607	3720	2	0	1	0	0
67	0	0.750873672	55	2	0.316416365	7723	17	0	1	0	1
68	0	0.006799093	27	1	0.681045752	764	3	0	0	0	0
69	0	0.004264079	31	0	0.111444278	2000	6	1	0	0	2
70	0	0.26948375	64	0	0.16106176	9455	13	0	1	0	3
71	0	0.265898391	36	0	0.262611807	8384	6	0	2	0	1
72	0	0.142013011	67	0	1824	NA	7	0	2	0	0
73	0	0.827708197	56	0	0.369590815	6793	15	1	1	0	0
74	0	0.059668871	31	0	3162	0	11	0	2	0	1
75	1	0.13306279	49	1	0.182881653	10257	9	0	2	0	3
76	0	0.234218112	36	0	0.116614347	8600	19	0	0	0	3
77	0	0.122295933	29	0	0.694646949	4800	5	0	1	0	0
78	0	0.460376317	37	0	0.074155949	4975	6	0	0	0	0
79	0	0.335558577	69	0	0.270448637	15000	14	0	2	0	1
80	0	0.270522569	41	0	2.797698945	1042	11	0	2	0	2
81	0	0.183316667	52	0	0.111131623	10833	14	0	2	0	1
82	0	0.074861676	66	0	0.208842479	4500	3	0	1	0	0
83	0	0.017258977	53	0	2.604510673	12414	13	0	1	0	2
84	0	0.054497069	56	0	0.492021814	4950	18	0	2	0	0
85	0	0.029164236	31	0	0.395031809	3300	10	0	1	0	0
86	0	0	58	0	0.316144874	4886	9	0	1	0	1
87	0	0.360509632	58	1	3282	NA	8	0	2	0	0
88	0	0.003749688	64	0	0.004061231	3200	5	0	0	1	0
89	1	0.734477501	45	0	0.591477634	4716	13	0	2	0	2
90	0	0.080564168	60	0	0.487288997	4916	15	0	2	0	0
91	0	0.039387786	51	0	15466	0	7	0	0	0	0
92	0	0.023767433	83	0	0.123797734	10500	13	0	0	0	0
93	0	0.784835658	52	0	2662	NA	10	0	2	1	0
94	0	0.888822236	34	0	0.368403802	3050	4	0	0	0	1
95	0	0.791173628	44	0	0.51241535	3100	5	0	1	0	0
96	0	0.24535301	37	0	0.288417167	6500	11	1	1	1	0
97	0	0.542242704	48	2	10	NA	2	0	0	0	NA
98	0	0.010531379	57	0	0.280664917	5714	6	0	1	0	0
99	0	0.363199686	32	0	0.480523957	2900	4	0	1	0	0
100	0	0.032617977	75	0	0.006799093	7500	4	0	0	0	0
101	0	0.013024674	61	0	15	NA	4	0	0	0	0
102	0	0.019387779	34	0	0.32591852	4000	9	0	1	0	0
103	0	0.634485057	52	0	0.138238573	2690	2	0	0	0	0
104	0	0.888008615	44	0	0.299246282	4908	8	0	0	0	1
105	0	0.003108849	57	0	0.258939285	8333	7	0	1	0	0
106	0	0.114830941	46	0	0.026235802	6250	6	0	0	0	3
107	0	0.018886792	80	0	0.003478779	10060	5	0	0	0	0
108	0	0.635415157	32	0	0.519493502	3000	4	0	1	0	1
109	0	0.9999999	62	0	0.664221287	8314	8	0	3	0	0
110	0	0.041257909	61	0	4739	NA	11	0	4	0	NA
111	0	0.096737158	47	0	0.009748781	8000	2	0	0	0	2
112	0	0.31844615	58	0	1.382629108	3833	26	0	4	0	0
113	0	0.186987534	52	0	0.023993145	3500	4	0	0	0	0
114	0	0.006541851	68	0	0.108089191	10000	10	0	2	0	1
115	0	0.180972181	39	1	0.384441575	3097	7	0	1	0	3
116	0	0.00750765	74	0	7	NA	4	0	0	0	0
117	0	0.06790706	46	0	0.149103029	10200	6	0	2	0	0
118	0	0.033461782	44	0	1.243362832	4067	5	0	2	0	1
119	0	0.007520592	68	0	269	NA	4	0	0	0	0
120	0	0.015271802	68	0	0.12290366	8168	6	0	0	0	0
121	0	0.51712072	31	0	0.123752495	500	3	0	0	0	0
122	0	0.317975796	34	0	0.297933792	4500	11	0	2	0	0
123	0	0.297594642	67	0	0.239507959	4145	13	0	0	0	0
124	0	0.444837661	58	0	0.366545247	14000	9	0	2	1	4
125	0	0.277956679	39	0	4090	NA	9	0	2	0	0
126	0	0.003722015	58	0	0.63332301	3228	5	0	1	0	0
127	0	0	61	0	0.2226598	3300	14	0	1	0	0
128	0	0	59	0	0.218854341	19167	13	0	2	0	0
129	0	0.151912549	36	0	0.266394467	12000	22	0	2	0	0
130	0	0	59	0	0.351699622	4500	12	0	1	0	0
131	0	0.175727593	43	1	994	NA	4	0	1	0	0
132	0	0.011498563	77	0	0.001998002	1000	1	0	0	0	0
133	0	0	48	0	0.517468688	4550	7	0	2	0	0
134	0	0.163037489	81	0	0.086482558	2751	7	0	0	0	1
135	0	0.047311582	51	0	0.100920343	3150	5	0	0	0	0
136	0	0.083880003	53	0	0.199647533	7943	8	0	1	0	0
137	0	0.089478348	56	0	1.065901518	2700	11	0	1	0	2
138	0	0.773519223	63	0	1.129227053	4139	12	0	1	0	1
139	0	0.093962275	55	0	0.112051635	9450	6	0	2	0	0
140	0	0.21955042	54	0	0.315983758	5417	20	0	2	0	1
141	0	0.147996253	55	0	0.323088235	6799	5	0	1	0	0
142	0	0.576518559	72	0	3031	NA	11	0	1	0	0
143	0	0.243872021	53	0	0.534027778	8639	22	0	2	0	3
144	0	0.362483818	27	0	567	NA	4	0	0	0	0
145	0	0.116676791	31	0	0.343593791	3800	7	0	1	0	0
146	0	0.9999999	38	0	0.43369976	5821	7	0	1	0	4
147	0	0.496911825	40	0	0.452363811	12500	11	0	2	0	2
148	0	0.130902106	48	1	0.427882174	3937	17	0	1	0	0
149	0	0.54699881	50	0	0.748071979	3500	9	0	2	0	3
150	0	0.072277109	34	0	0.025911708	2083	2	0	0	0	0
151	0	0	48	2	0.370876375	3000	14	0	1	0	5
152	0	0.175932019	57	1	0.655812625	3500	9	0	1	0	1
153	0	0.050789842	30	0	0.315171207	4000	4	0	1	0	1
154	0	0	28	0	0.144616356	3166	7	0	0	0	0
155	0	0.21286031	36	0	0.563752087	9583	10	0	2	0	1
156	0	0.012682366	60	0	0.412979783	6825	20	0	2	0	0
157	0	0.121557062	58	0	0.342971419	12000	23	0	2	0	4
158	0	0.040795358	49	0	0.801999355	3100	11	0	1	0	0
159	0	0.147712223	40	0	0.034847816	6800	6	0	0	0	3
160	0	0	63	0	2	NA	4	0	0	0	NA
161	0	0	50	1	0.726566993	3477	5	0	1	0	1
162	0	0.070771911	38	0	2088	NA	6	0	1	0	0
163	1	1.046279103	47	1	1.104301274	5416	6	0	2	0	1
164	0	0.323719804	63	0	0.610841267	5146	9	0	2	0	2
165	0	0.36459777	42	0	0.593899089	6916	7	0	3	0	0
166	0	0.637736406	54	2	3.382196162	1875	9	0	2	0	0
167	0	0.081379827	63	0	1268	NA	8	0	1	0	0
168	0	0.020966389	29	0	639.5	1	3	0	1	0	2
169	0	0.170103002	36	0	0.138461538	7734	8	0	0	0	0
170	0	0.771845631	33	0	0.852429514	5000	7	0	3	0	0
171	0	0.05538241	72	0	0.089091313	4500	4	0	0	0	0
172	0	0.9999999	29	0	974	NA	2	0	0	0	0
173	0	0.16653274	53	0	0.543625949	7506	11	0	3	0	3
174	0	0.008632035	79	0	0.365151154	4200	9	0	1	0	0
175	0	0.13527952	58	0	0.342005076	9455	11	0	2	0	2
176	0	0.167571389	69	0	0.330733853	5000	10	0	1	0	1
177	0	0.9999999	69	0	0.005319149	2255	0	1	0	0	3
178	0	0.068335151	75	0	0.010927876	10065	9	0	0	0	0
179	0	0	41	0	0.907538526	2400	6	0	1	0	0
180	1	0.946963874	35	0	1593	NA	6	0	1	0	1
181	0	0.405183973	46	0	0.667835346	7700	22	0	2	0	1
182	0	0.055549313	65	0	2177	NA	6	0	1	0	1
183	0	0.676195456	55	0	0.436665827	3970	10	1	1	0	0
184	0	0.184986787	55	4	3144	NA	11	0	1	0	0
185	1	0.085338293	51	0	0.477503628	6200	11	0	1	0	0
186	1	0	25	0	0.152896812	2916	3	0	0	1	0
187	1	0.786485406	44	0	0.291709578	3883	7	2	0	2	1
188	0	0.0112096	86	0	13	NA	3	0	0	0	0
189	0	0.03833451	56	0	0.438912218	5000	7	0	2	0	0
190	0	0.714980139	55	0	0.47090194	15000	12	0	2	0	3
191	0	0.043032042	64	0	0.332016389	6833	14	0	2	0	0
192	0	1.095083357	53	5	0.536703799	3500	7	1	1	2	0
193	0	0	49	0	2932	NA	11	0	1	0	0
194	0	0.9999999	55	0	0.156259612	3250	5	0	0	0	4
195	0	0.101430135	80	1	0.016196761	5000	9	0	0	0	0
196	1	0.025892469	38	0	74.5	1	13	0	0	0	2
197	0	0.762158561	44	4	0.224465502	21000	5	0	1	0	3
198	0	0.231692268	40	0	0.119660709	3300	7	0	0	0	0
199	0	0.114869499	35	0	103	NA	6	0	0	0	0
200	0	0.035489848	69	0	0.308438695	3400	9	0	1	0	0
201	0	0.045423864	64	0	0.181311286	5200	4	0	1	0	0
202	0	0.311954668	61	0	0.269281443	9866	12	0	2	0	2
203	0	0.078738916	46	0	0.166215372	4800	6	0	1	0	4
204	0	0.137609462	49	0	0.429533892	7272	11	0	2	0	0
205	0	0.030173038	64	0	0.17386957	9000	8	0	1	0	0
206	0	0.021978375	40	0	0.443755624	10000	12	0	5	0	2
207	0	0.443696851	27	0	0.024340075	5833	4	0	0	0	0
208	0	0.007506793	60	0	1253	NA	8	0	1	0	1
209	0	0.046640328	92	1	0.034326669	2650	13	0	0	0	0
210	0	0.292365949	50	0	0.420180551	8750	8	0	2	0	0
211	0	0.20808276	64	0	2826	NA	14	0	2	0	0
212	0	0.9999999	66	1	0.358101135	1937	4	1	0	0	0
213	0	0.013500824	53	0	0.183464028	19000	8	0	1	0	2
214	0	0.9999999	62	0	0.04965839	6000	1	0	0	0	0
215	1	0.655316473	63	0	5223	NA	19	0	2	0	0
216	0	0.9999999	50	2	1208	NA	4	0	1	0	0
217	0	0.028113957	61	0	0.031349387	2200	12	0	0	0	0
218	0	0.222696207	42	0	800	1	3	0	1	0	2
219	0	0.593985244	63	0	0.332698534	5250	4	0	2	0	0
220	0	0.017508178	73	1	0.135589153	4166	12	0	1	0	0
221	0	0.611865678	72	0	0.04578345	7600	3	0	1	0	0
222	0	0.333060631	52	3	0.700153374	5215	15	0	2	1	0
223	0	0.009025178	45	0	0.376836435	8167	4	0	1	0	2
224	0	0.260271523	44	0	0.296854804	6962	11	0	1	0	0
225	0	0.455950788	63	1	0.701766078	6001	19	0	2	0	0
226	0	0.080288098	37	0	0.322446259	6000	7	0	1	0	0
227	1	1.953488372	38	0	0.153500141	3556	5	0	0	0	2
228	0	0.181557324	36	0	0.56071964	2000	7	0	1	0	1
229	0	0.147123525	41	0	0.436025621	6400	5	0	1	0	2
230	0	0.025601772	63	1	0.262773723	10000	8	0	1	0	0
231	0	0	76	0	0.002465931	7704	3	0	0	0	0
232	0	0.196372799	43	0	0.537485582	2600	10	0	1	0	0
233	0	0.083945242	64	0	0.588073078	2900	6	0	1	0	0
234	0	0.034833091	67	0	0.460246187	12916	9	0	2	0	0
235	0	0.787522133	52	0	0.353860086	4416	12	0	0	0	1
236	0	0	66	0	3730	NA	8	0	1	0	0
237	0	0.125429152	55	0	0.476704659	5000	3	0	2	0	0
238	0	0.06037487	42	0	0.578676723	5833	17	0	2	0	2
239	0	0.9999999	28	0	0	NA	0	0	0	0	NA
240	0	0.295928252	47	0	0.283765445	14000	6	0	2	0	1
241	1	0.973339258	61	1	0.209961825	5500	11	0	0	1	1
242	0	0.002856735	73	0	0.000285687	10500	10	0	0	0	0
243	0	0.877564897	58	0	2825	NA	10	0	2	0	0
244	0	0.9999999	68	0	0.040493251	6000	0	0	0	0	0
245	0	0.053431552	41	0	0.20364404	9000	3	0	1	0	0
246	0	0.732660667	44	2	0.14041952	9200	15	0	1	0	0
247	0	0.084220458	42	0	0.458551158	6694	26	0	2	0	4
248	0	0.114561798	40	0	0.359964004	10000	20	0	2	0	2
249	0	0.012151003	78	0	0.008886914	4500	12	0	0	0	0
250	0	0.081310737	81	0	0.165566887	3333	4	0	0	0	0
251	0	0.09811305	49	0	0.257017809	6625	9	0	2	0	0
252	1	1.048210842	58	7	0.151956584	3500	12	0	0	0	0
253	0	0.011883886	54	0	0.092913547	9750	8	0	1	0	2
254	0	0.75264947	33	1	0.058322869	7166	6	0	0	0	0
255	0	0.112321289	53	0	0.266909775	8500	9	0	1	0	5
256	0	0	23	0	0	1725	1	0	0	0	0
257	0	0.634327056	49	1	0.123125125	15000	7	0	0	0	1
258	0	0.15576324	44	0	0.278077082	4825	4	0	1	0	2
259	0	0	63	0	0.007988922	9387	9	0	0	0	0
260	0	0.090614887	42	0	86	NA	5	0	0	0	0
261	0	0.034645112	65	0	0.125189985	12500	4	0	1	0	1
262	0	0.027446383	54	0	1612	NA	6	0	1	0	0
263	0	0.412398622	28	0	0.037259615	4991	5	0	0	0	0
264	0	0.024670782	78	0	392	NA	6	0	1	0	NA
265	0	0.046710961	66	0	1.117952819	2500	12	0	1	0	0
266	0	0.976531824	32	0	0.264078812	6800	6	0	0	0	2
267	0	0.007982621	43	1	0.009691169	208333	11	0	1	0	1
268	0	0.267541336	59	0	0.637607437	5700	13	0	2	0	1
269	0	0.019779326	76	0	0.267149259	2900	9	0	0	0	0
270	0	0.010402205	68	0	0.094140517	3600	6	0	1	0	0
271	0	0.9999999	61	0	0.529548989	1285	3	0	1	0	0
272	0	0.029816467	68	0	0.175139978	4464	12	0	1	0	1
273	0	0.181713732	57	0	0.130453416	11666	17	0	1	0	1
274	0	0.051368557	68	0	0.445277361	4668	10	0	1	0	2
275	0	0.29264536	57	0	0.205927884	26484	11	0	2	0	3
276	1	0.220823719	46	1	0.637749121	1705	5	0	0	0	0
277	0	0.008099838	69	0	0.389895596	8332	3	0	1	0	0
278	0	0	44	0	0.326383681	6666	4	0	2	0	1
279	0	0.006099797	28	0	0.139429485	3750	8	0	0	0	0
280	0	0.909538698	53	1	0.595653913	7500	16	0	1	0	1
281	0	0.941072508	40	0	0.178184282	8855	9	0	1	0	0
282	0	0.991667222	36	1	0.554878049	5411	10	0	2	0	1
283	0	0.691488418	42	0	0.272721679	16250	11	0	1	0	1
284	0	0.112855258	64	0	0.307576329	2652	6	0	1	0	0
285	0	0.260971034	57	0	5439	NA	16	0	3	0	NA
286	0	0.048244493	62	0	0.262879153	16615	11	0	1	0	1
287	0	0.9999999	47	0	0.092163472	9493	2	2	0	1	0
288	0	0.9999999	62	0	0	5480	3	0	0	0	0
289	0	0.074256375	49	0	0.347930414	5000	11	0	2	0	3
290	0	0.144878408	66	0	0.28446242	8900	9	0	1	0	0
291	0	0.191001932	54	0	0.705627706	5081	10	0	2	0	2
292	0	0.219382879	56	1	942	NA	9	0	1	0	1
293	0	0.679813777	83	0	0.689589756	4216	6	0	2	0	0
294	0	2340	45	0	0.339332853	8333	7	0	2	0	2
295	0	0.371875401	29	0	0.53628857	2300	9	0	1	0	3
296	0	0.025856408	67	0	0.083799311	13054	13	0	1	0	0
297	0	0.547887778	29	1	0.24651504	2725	5	0	0	1	0
298	0	0.271668778	46	1	0.282830201	15800	14	0	2	0	4
299	0	0.085152475	25	0	1005	0	5	0	0	0	0
300	0	0.897203427	68	0	0.787803049	4000	8	0	2	0	0
301	0	0.25889775	33	0	0.537441339	4900	3	0	1	0	1
302	0	0	55	1	0.03988553	5590	8	0	0	0	0
303	0	0.035940506	46	0	0.271186441	6666	10	0	1	0	3
304	0	0.9999999	66	0	0.046633911	11600	2	0	0	0	1
305	0	0.465238835	66	0	0.391427671	3172	8	1	1	0	0
306	0	0.865423051	48	0	0.075848303	500	1	0	0	0	0
307	0	0.696411671	52	0	0.408871921	11000	11	0	1	0	4
308	0	0.544497658	32	1	0.166766647	6667	5	1	0	0	0
309	0	0.081238383	51	0	0.066830086	7750	14	0	0	0	2
310	0	0.948762809	27	0	0.144948404	4166	5	0	0	0	0
311	0	0	32	2	0.463610776	7460	10	0	1	1	0
312	0	0.016598893	30	0	0.136575616	1500	5	0	0	0	0
313	0	0.063329564	37	0	0.329935275	6179	6	0	1	0	3
314	0	0.093638481	49	0	0.042836573	8333	10	0	0	0	1
315	0	0	37	0	0.184027338	7900	5	0	1	0	5
316	0	0.730271957	36	1	0.632794037	5500	10	0	2	0	0
317	0	0.426371142	62	1	0.406053995	3666	15	0	1	0	0
318	0	0.948978489	57	0	0.043744532	8000	3	0	0	0	1
319	0	0	59	0	0	4200	7	0	0	0	1
320	0	1.00264667	38	2	0.472542946	3550	8	1	0	1	4
321	0	0.0164781	92	0	10	NA	3	0	0	0	0
322	0	0.042606843	58	0	3976	NA	13	0	3	0	0
323	0	0.022890604	37	0	0.288477299	6100	16	0	1	0	0
324	0	0.283821988	63	0	0.750200803	1244	9	0	0	0	0
325	0	0.319779462	32	0	1.247340213	12500	12	0	8	0	0
326	0	0.155240525	52	0	0.483518065	6946	15	0	2	0	1
327	0	0.013115183	43	0	4211	0	21	0	2	0	2
328	0	0.067259209	29	1	0.168340507	2090	3	0	0	0	0
329	0	0.284236153	45	1	0.318890815	7500	9	0	1	0	2
330	0	0.727560021	38	0	0.712458746	2423	6	0	1	0	1
331	0	0.687779097	62	0	0.249471161	7090	15	0	0	0	0
332	0	0.9999999	29	0	0	NA	0	0	0	0	0
333	0	0.033708851	41	0	0.408706353	6500	9	0	1	0	2
334	0	0	29	0	0.193935355	3000	7	0	0	0	0
335	1	0.03719769	47	0	0.03975841	25000	11	0	1	0	3
336	0	0	55	1	0.388320836	4400	4	0	2	0	1
337	0	0.053589282	87	0	0.001534331	5213	4	0	0	0	0
338	0	0.100773109	41	0	0.199761673	9230	7	0	1	0	0
339	0	0	61	0	1.394967177	913	11	0	2	0	0
340	0	0.399946674	28	0	0.189702574	4000	6	0	0	0	1
341	0	0.052653171	43	0	0.572292191	1984	9	0	0	0	4
342	0	0.072318616	71	0	0.426412462	4300	8	0	2	0	1
343	0	0.203959597	46	0	0.072914726	16100	6	0	1	0	2
344	0	0.9999999	30	0	0.090341011	5600	1	0	0	0	0
345	1	0.880370887	43	0	0.461323764	7523	6	0	1	0	1
346	0	0.429246267	59	0	0.381254316	15928	17	0	1	0	1
347	0	0	47	0	773	NA	2	0	1	0	1
348	0	0.049529205	61	0	542	NA	15	0	0	0	0
349	0	0.360907571	72	0	0.356679286	3697	6	0	1	0	0
350	0	0.335737457	50	0	0.45722203	5773	9	0	1	0	1
351	1	0.635720859	68	1	0.218071277	25000	27	0	3	0	0
352	0	0	58	0	8380	NA	20	0	5	0	0
353	0	0.507972665	69	2	0.193935355	3000	10	2	0	2	0
354	0	0.245841666	71	0	151	NA	5	0	0	0	0
355	1	0.953343701	48	2	2073	NA	5	1	2	2	0
356	0	0.9999999	37	0	0.184625639	4500	2	0	0	0	1
357	0	0.118853837	50	0	2720	NA	7	0	1	0	2
358	0	0.630073985	38	0	0.563328034	1886	3	0	1	0	0
359	0	0.9999999	35	0	3388	NA	1	0	1	0	0
360	0	0.028423247	59	0	0.033982276	14330	12	0	1	0	0
361	0	0.143427862	67	0	0.119463561	5666	9	0	0	0	0
362	0	0.186682782	30	0	0.698120752	2500	7	0	2	0	2
363	0	0.496388581	56	0	0.170164956	19580	12	0	1	0	1
364	0	0.457526639	51	0	0.333583302	8000	16	0	2	0	2
365	0	0.728218119	40	1	3878	NA	10	0	2	0	0
366	0	0.947264856	28	0	0.467171717	1187	4	0	0	0	0
367	0	0.013916922	54	0	0.017655818	4700	7	0	0	0	2
368	0	0.066347297	46	1	4480	NA	6	0	2	0	0
369	0	0.502958087	57	0	6381	NA	5	0	2	0	0
370	0	1.047495906	35	2	0.314566116	3871	8	0	2	1	3
371	0	0.012586354	79	0	0.009596162	2500	11	0	0	0	0
372	0	0.543445655	46	0	0.267146571	5000	6	0	2	0	3
373	0	0.026580302	79	0	1063	NA	7	0	1	0	0
374	0	0.082317351	64	0	0.214426305	8636	29	0	1	0	1
375	0	0.292541492	74	0	0.164917541	2000	3	0	0	0	0
376	0	0.024240472	64	0	0.101514142	10500	20	0	1	0	0
377	0	0.047650102	63	0	0.387956894	9000	6	0	2	0	0
378	1	0.739146488	63	1	0.285156885	6150	12	0	0	0	1
379	0	0.186890655	54	0	0.655589124	3640	7	0	1	0	1
380	0	0.007501937	63	0	0.278226307	8050	13	0	2	0	3
381	0	0.522314625	45	0	0.290229092	14491	13	0	1	0	3
382	0	0.9999999	22	0	130	NA	0	0	0	0	NA
383	0	0.571604587	66	0	870	NA	12	0	0	0	NA
384	0	0.903231566	57	0	0.13080895	5228	10	0	0	0	0
385	0	0.017043518	43	0	0.10821382	2300	6	0	0	0	1
386	0	0.060733396	61	0	0.008549573	20000	8	0	0	0	0
387	0	0.000582648	54	0	2028	NA	13	0	1	0	1
388	0	0.003894686	90	0	876	NA	11	0	1	0	0
389	0	0.250008365	60	0	2.086478612	7550	26	0	0	0	0
390	0	0.466334165	34	2	0.007495315	3201	3	0	0	0	0
391	0	0.114588541	38	0	34	NA	2	0	0	0	0
392	0	0.9999999	60	0	0	4200	0	0	0	0	0
393	0	0.267905614	76	0	0.285452994	8200	12	0	0	0	0
394	0	0.029694361	76	0	0.070513488	9600	7	0	0	0	2
395	0	0.305246317	39	0	0.188281635	10154	6	0	1	0	2
396	0	0.000685675	83	0	0	NA	4	0	0	0	0
397	0	0.702493864	63	0	0.582162622	4697	8	0	2	0	1
398	0	0.742436041	52	0	0.414081023	9700	10	0	2	0	0
399	1	0.802417179	58	1	668	NA	5	1	0	0	0
400	0	0.9999999	42	1	0.113421853	6250	3	3	0	1	2
401	0	0.134191514	63	0	926.5	1	9	0	1	0	0
402	0	0.002556199	58	0	0.115826132	7752	17	0	0	0	2
403	0	0.088845558	62	0	0.073772011	5394	5	0	0	0	0
404	0	0.203947961	46	1	1.206516118	5800	12	1	4	0	2
405	0	0.006666097	27	0	0.000268637	7444	5	0	0	0	0
406	0	0.014049649	27	0	0.352214765	3724	4	0	1	0	1
407	0	0.9999999	35	1	0.092985318	3064	1	0	0	0	3
408	0	0.368866624	55	0	0.437996083	9700	18	0	2	0	0
409	0	0.054553316	73	0	0.043259135	16666	13	0	0	0	0
410	0	0.179487766	51	0	0.492529978	10173	19	0	4	0	0
411	0	0.026885902	36	0	0.344879921	11200	6	0	2	0	2
412	0	0.265705207	56	0	0.259102536	31666	8	0	3	0	1
413	0	0	59	0	2113	NA	13	0	2	0	NA
414	0	0.011847989	49	0	1599	NA	12	0	1	0	0
415	0	0.07083751	64	0	0.255290785	6000	6	0	0	0	1
416	0	0.030996074	56	0	0.131430952	4800	11	0	1	0	0
417	0	0.144914011	37	0	0.045366363	6700	5	0	0	0	0
418	0	0.353017659	48	0	1.299736021	4166	17	0	1	0	1
419	0	0.020074662	36	0	0.334245422	4750	5	0	1	0	0
420	0	0.032769199	70	0	724	NA	11	0	1	0	0
421	1	0.733885463	49	2	0.369223765	8785	20	0	2	0	2
422	0	0.063514422	57	0	2221.5	1	12	0	2	0	0
423	0	0.03157211	39	0	0.644706486	3900	14	0	1	0	1
424	1	0.991502124	61	10	1.2979007	3000	11	2	3	5	1
425	0	0.397702982	38	0	0.41627543	5750	6	0	1	0	2
426	0	0.971352432	24	0	0.035803497	1200	3	0	0	0	0
427	0	0.9999999	33	0	1786	NA	3	0	1	0	0
428	0	0	73	0	0.386728192	4550	18	0	0	0	0
429	0	0.9999999	79	0	0.130140954	5178	6	0	1	0	0
430	0	0.003851709	81	0	0.000822143	3648	1	0	0	0	1
431	0	0.010887967	55	0	0.725137431	2000	7	0	2	0	0
432	0	0.686083014	57	0	0.16069592	11667	6	1	1	0	2
433	0	0.212464485	58	0	0.518991188	3290	10	0	1	0	1
434	0	0.006956358	52	0	0.003278689	2439	4	0	0	0	0
435	0	0.073251754	51	0	0.446688128	10250	9	0	1	0	2
436	0	0.431904058	63	0	0.41905226	8208	22	1	2	0	0
437	0	0.006999563	97	0	3	NA	2	0	0	0	NA
438	0	0.014310431	56	0	13	NA	2	0	0	0	0
439	0	0.026944485	41	0	0.686736475	4583	8	0	3	0	0
440	0	0.297094601	43	1	0.603763294	3666	9	0	1	0	2
441	0	0.316064767	56	0	1348	NA	3	0	1	0	0
442	0	0	59	0	862	NA	2	0	1	0	0
443	0	0.922670104	40	0	0.207789429	9345	7	0	0	0	0
444	0	0.051077957	74	0	0.306409131	3416	9	0	1	0	0
445	0	0.319190816	49	0	0.358153388	9400	18	0	2	0	0
446	0	0.008737352	68	0	0.209965006	6000	28	0	1	0	0
447	0	0	57	0	0.785229953	6783	8	0	3	0	0
448	0	0.243674266	48	0	0.179979778	8900	10	0	1	0	6
449	0	0.9999999	40	1	0.19170579	3833	3	2	0	0	2
450	0	0	23	0	0	3500	1	0	0	0	1
451	0	0.028910707	52	0	0.013543599	5389	7	0	0	0	2
452	0	0.03423863	48	0	2045	NA	3	0	1	0	0
453	0	0.50329934	55	0	0.454057468	3166	5	0	2	0	0
454	0	0.799981673	61	3	0.671076012	5064	19	0	3	1	0
455	0	0.069987933	33	0	0.114004783	3762	7	0	0	0	0
456	0	0.067901335	69	0	0.065493451	10000	5	0	1	0	0
457	0	0.740635161	39	0	0.432010059	5566	7	0	1	0	0
458	0	0.023382944	84	0	0.00912845	4600	6	0	0	0	0
459	0	0.9999999	32	2	0.095584668	2060	1	0	0	0	0
460	0	0.003625197	78	0	726	NA	8	0	1	0	NA
461	0	0.092287617	61	0	0.229436075	7500	23	0	2	0	2
462	0	0	37	0	0.177007047	7236	5	0	1	0	3
463	0	0.9999999	33	1	0.257707218	5416	2	2	1	0	1
464	0	0.057867667	81	0	0.145685279	3939	13	0	0	0	0
465	0	0.07807727	60	0	0.566105156	3917	14	0	1	0	2
466	0	0.201943642	46	0	0.394460554	10000	15	0	2	0	3
467	0	0.077958915	57	0	0.053530226	6500	19	0	0	0	0
468	0	0.205676486	57	0	0.130309575	8333	8	0	1	0	0
469	1	0.9999999	32	0	0.006731051	3416	1	0	0	0	3
470	1	0.57985084	42	0	0.594224361	2700	8	0	0	0	0
471	0	0.073393457	38	1	0.384761524	10000	9	0	2	0	0
472	0	0.079178219	82	0	0.176964607	5000	3	0	1	0	0
473	0	0.073123172	33	0	0.216405216	5290	9	0	0	0	0
474	0	0.745173448	68	0	0.168767792	4917	4	0	1	0	0
475	0	0.10088331	52	1	0.280494456	5500	6	1	1	0	2
476	0	0.347665233	46	0	0.041583367	2500	1	0	0	0	1
477	0	0.102031508	66	0	90	NA	4	0	0	0	0
478	0	0.354125994	57	0	0.558762411	4330	4	0	1	0	0
479	0	0.029643294	50	0	0.399106478	9400	15	3	4	0	0
480	0	0.540204354	34	0	0.034395414	7500	3	1	0	0	0
481	0	0.640927271	53	4	0.52409692	11266	17	0	2	0	3
482	0	0.058271403	76	0	0.374304267	4311	7	0	1	0	0
483	0	0.719305764	64	0	0.186225718	6228	5	0	1	0	0
484	0	0.045017363	72	0	0.020763907	3900	8	0	0	0	0
485	0	0.35592819	48	0	0.478090767	7667	17	0	2	0	0
486	0	0.57762185	71	1	0.4925	6399	14	0	2	0	1
487	0	0.015054291	59	0	929	NA	11	0	1	0	2
488	0	0.320593837	53	0	1.114622389	5600	14	0	1	0	1
489	0	0.047587303	34	0	997	NA	4	0	0	0	NA
490	0	0.173428408	51	1	0.086269282	5250	11	0	0	0	0
491	0	0.401789055	55	0	0.412779302	2550	11	0	0	0	0
492	0	0.301152442	46	0	0.254661625	7668	10	0	1	0	3
493	0	0	27	2	0.229139073	2264	5	2	0	1	0
494	0	0.067512585	43	0	0.44723563	9115	4	0	2	0	0
495	0	0	75	0	0.205971968	1640	4	0	0	0	1
496	0	0.993335555	31	0	0.068227425	4484	6	0	0	0	1
497	0	0.138793584	43	0	0.384074741	11666	9	0	5	0	0
498	0	0.193584801	51	0	0.532754538	3800	13	0	2	0	0
499	0	0.001124859	28	1	0.057990335	6000	8	1	0	0	0
500	0	0.485558448	51	0	0.09963548	6583	5	0	0	0	0
501	0	0.979521555	55	1	0.467850417	7433	11	0	2	2	0
502	0	0.090641506	69	0	0.016683267	4015	2	0	0	0	0
503	0	0.38480769	42	0	0.533099636	7416	5	0	1	0	3
504	0	0.183676155	33	0	0.660528423	2497	9	0	1	0	0
505	0	0.018124667	60	0	0.023181455	1250	4	0	0	0	1
506	1	0.9999999	54	0	0.228402866	2372	2	0	0	1	0
507	0	0.290320472	48	0	0.262848568	7996	7	0	1	0	3
508	0	0.052161271	49	0	0.067629397	6993	5	0	0	0	1
509	0	0.9999999	73	0	8500	0	2	0	0	0	0
510	0	0.9999999	91	0	0	NA	3	0	0	0	NA
511	0	0.412657703	66	1	0.195074372	4100	7	1	0	0	0
512	0	0.091201293	49	1	0.568886223	5000	15	0	2	0	0
513	0	0.500234532	46	0	0.278025952	4700	10	0	1	0	1
514	1	0.913140498	37	2	1.620344914	4000	16	0	3	0	1
515	0	0.056390008	54	0	2126	NA	8	0	1	0	0
516	0	0.611388611	22	0	0.347066167	800	4	0	0	0	0
517	0	0.065630892	31	0	0.162635688	5250	10	0	0	0	0
518	0	0.499666889	39	0	0.450171821	3200	8	0	1	0	0
519	0	0.9999999	56	0	7	NA	1	0	0	0	0
520	0	0.289470539	44	0	0.4825614	8916	17	0	2	0	1
521	1	0.814154511	50	1	0.297139683	3600	8	0	1	1	1
522	0	0.016406971	55	0	0.001785714	5599	3	0	0	0	2
523	0	0.078497383	52	0	0.207274054	8220	5	0	1	0	3
524	0	0.029692431	58	2	0.287187752	6204	19	0	1	0	0
525	0	0.01255887	62	0	0.044762033	7416	5	0	0	0	0
526	0	0.062093267	42	0	0.230261579	8333	6	0	1	0	4
527	0	0.074201053	47	0	1215	NA	4	0	1	0	NA
528	0	0.551889862	42	1	0.790613718	3600	18	0	2	0	1
529	1	0.640058527	39	0	0.055984556	9841	9	0	0	0	2
530	0	0.581815774	45	0	0.724784402	8000	11	0	2	0	0
531	0	0	82	0	0	NA	3	0	0	0	0
532	0	0	64	0	3819	NA	3	0	2	0	NA
533	0	0.312068793	55	1	0.127071823	1266	5	0	0	0	0
534	0	0.266371179	58	0	0.498488489	12900	12	0	1	0	2
535	0	0.040186458	35	0	0.300839136	5600	8	0	2	0	1
536	0	0.749602291	62	0	7963	NA	7	0	2	0	3
537	1	0.955545894	52	1	0.524949909	10480	11	0	3	0	1
538	0	0.086635409	40	0	887	0	8	0	1	0	1
539	0	0.212768452	57	0	2301	NA	17	0	2	0	0
540	0	0.9543957	45	2	0.4842141	8836	10	0	1	0	1
541	0	0.188256123	27	0	0.881825173	3900	6	0	1	0	1
542	0	1.245847176	24	1	499	NA	4	1	0	0	NA
543	0	0.014049887	37	0	0.674399608	6120	9	0	1	0	0
544	0	0.329609837	36	0	0.437743191	3597	16	0	2	0	2
545	0	0.484099985	40	0	0.423251505	10794	9	0	2	0	2
546	0	0	86	0	2	NA	9	0	0	0	0
547	0	0.035113768	56	0	87	NA	11	0	0	0	0
548	0	0.084826988	59	0	0.53418212	3612	9	0	2	0	0
549	0	0.9999999	40	0	0.60616581	7200	6	0	3	0	0
550	0	0.152250785	49	0	0.030774358	9000	3	0	0	0	0
551	0	0.2128856	66	0	0.351891786	5100	10	0	1	0	0
552	0	0.9999999	63	3	0.200843235	5217	5	0	1	1	4
553	0	0.9999999	45	0	461	NA	2	0	0	0	0
554	0	0	30	0	0	4700	1	0	0	0	1
555	0	0.576284725	36	0	0.785404865	3000	10	0	1	0	1
556	0	0.408215982	39	0	677	NA	4	0	0	0	2
557	0	0	27	0	0	4500	5	0	0	0	0
558	0	0.10680013	44	3	0.747375437	6000	8	0	3	0	2
559	0	0.004552998	34	0	3	NA	2	0	0	0	0
560	0	0.277436128	59	0	0.388566694	3620	8	0	1	0	1
561	0	0.285342534	38	0	0.08951092	3250	4	0	0	0	3
562	0	0.162077194	38	0	0.024885359	70000	6	0	1	0	2
563	0	0.57073821	39	0	1314	NA	5	2	2	0	0
564	0	0.622524722	43	0	0.353883732	10234	8	0	1	0	0
565	0	0.113165062	57	0	3169	NA	16	0	1	0	3
566	0	0	75	0	0.527431421	801	4	0	1	0	0
567	0	0.732711215	29	0	0.338531127	8400	10	0	1	0	0
568	0	0.486651335	55	0	0.324741695	9000	10	0	2	0	0
569	0	0.584844623	60	0	0.293637575	6003	11	0	1	0	0
570	0	0.875440658	37	0	0.437717467	1436	5	0	0	0	1
571	0	0.043861767	69	0	0.064119265	6908	7	0	1	0	0
572	0	0.03929607	48	0	0.480393478	7420	10	0	2	0	0
573	1	0.339503567	89	1	0.549380248	2500	9	3	0	1	0
574	0	0.064835195	56	2	0.197624587	8166	10	0	1	0	0
575	0	0.008684579	75	0	0.0013269	8289	5	0	0	0	0
576	0	0.9999999	55	1	0.138721351	4144	1	0	0	0	0
577	0	0.503587987	63	0	1.308922769	4000	16	0	1	0	0
578	0	0.000309046	49	0	562	NA	10	0	1	0	NA
579	0	0.697812691	31	0	0.236980252	12000	10	0	0	0	1
580	0	0.650432993	61	0	0.368063194	10000	10	0	1	0	1
581	0	0.30248201	46	0	0.348057208	7900	12	0	1	0	2
582	0	0.9999999	40	0	0.185755935	2400	1	2	0	0	0
583	0	0.159116246	91	0	0.184123484	1813	6	0	0	0	0
584	0	0.768537191	46	0	2568	NA	5	0	0	0	0
585	0	0.155644438	56	0	0.336831584	2000	5	0	1	0	0
586	0	0.836294011	29	3	0.260170076	4350	8	0	1	0	1
587	0	0.293041811	45	0	0.373940678	3775	5	0	1	0	3
588	0	0.9999999	49	1	0.098937721	4800	1	0	0	0	4
589	0	0.271898248	64	0	556	NA	3	0	1	0	NA
590	0	0	51	0	0.238076192	10000	6	0	1	0	0
591	0	0.291956248	45	0	1021	NA	5	0	0	0	NA
592	0	0.106531463	78	0	0.024303074	5595	9	0	0	0	0
593	0	0.250818316	36	0	0.240143984	5833	6	0	2	0	1
594	0	0.181579946	54	0	0.3539428	6048	9	0	1	0	1
595	0	0.002964536	67	0	0.349026844	16800	14	0	5	0	0
596	0	0.048911121	63	0	0.102800764	6283	4	0	0	0	1
597	1	0.517045364	61	0	0.572590321	7500	20	0	2	0	0
598	0	0.024100447	86	0	0.010791367	2223	6	0	0	0	0
599	0	0.122976319	50	0	0.454103343	3289	6	0	1	0	1
600	1	0.387065977	51	0	0.350874186	5833	12	0	1	2	1
601	0	0.021741679	70	0	0.187762448	5000	11	0	1	0	0
602	0	0.269257489	44	0	0.607594937	1500	7	0	0	0	3
603	0	0.996301651	39	2	0.306101912	10930	17	0	0	0	1
604	0	0.019153961	49	0	0.201025979	33333	6	0	3	0	4
605	0	0.008665511	58	0	1.908629442	6500	17	0	5	0	0
606	0	0.155742213	39	0	723	0	13	0	0	0	2
607	0	0.733914381	33	0	0.158975542	4333	7	1	0	0	1
608	0	0.210442588	53	0	0.513602495	5770	10	0	2	0	1
609	0	0.095634788	36	0	0.175266904	2247	4	0	0	0	1
610	0	0.124801376	62	0	0.566894457	6584	15	0	2	0	0
611	0	0.016995185	62	0	0.002301937	5212	4	0	0	0	0
612	0	0.964038058	29	1	0.263516583	2200	6	0	0	0	0
613	0	0.211206477	44	1	0.2138395	2080	13	1	0	1	0
614	0	0.184476515	32	0	0.444956049	7166	11	0	2	0	0
615	0	0	52	0	0.444444444	3500	5	0	2	0	1
616	0	0.086605363	69	0	73	NA	2	0	0	0	NA
617	0	0.069069784	71	0	1468	NA	3	0	1	0	NA
618	0	0.187090597	63	0	0.506873282	4000	10	0	2	0	1
619	0	0.732202177	44	0	0.258576628	12912	26	0	0	0	0
620	0	0.392141112	54	0	1.383017398	3850	18	0	2	0	2
621	0	0.063688754	41	0	0.266876688	6665	8	0	0	0	1
622	0	0.616982372	32	1	0.191649336	6250	10	0	0	0	2
623	0	0.288541381	87	1	0.571428571	1700	23	0	0	0	0
624	0	0.221106801	43	0	0.157212981	7333	5	0	1	0	0
625	0	0.193612774	47	0	0.020146833	5856	1	0	0	0	3
626	0	0.014441183	75	0	0.145703611	16059	8	0	1	0	0
627	0	0.531963331	64	2	0.480082158	18500	19	0	3	0	1
628	0	0.346960384	41	0	1.432686655	1700	13	0	3	0	2
629	0	0.024305835	30	0	1581	NA	6	0	1	0	0
630	0	0.9999999	40	0	2866	0	2	0	2	0	0
631	0	0	56	0	0	6200	2	0	0	0	0
632	0	0.65854007	55	0	0.489714904	5541	6	0	1	0	0
633	0	0.104693763	36	0	0.297372704	4300	8	0	1	0	1
634	0	0.046740048	57	0	0.404799866	11916	13	0	3	0	0
635	0	0.057887851	56	0	0.238127698	4400	13	0	1	0	1
636	0	0.883182488	49	0	0.183736947	4500	18	0	0	0	2
637	0	0.005326455	53	0	79	0	4	0	0	0	0
638	0	0.088809584	51	0	0.295480067	7123	12	0	1	0	0
639	0	0.021319787	64	0	0.24496788	2334	13	0	1	0	0
640	0	0.281880372	28	0	0.179975176	2416	7	0	0	0	0
641	0	0.063062463	54	0	4659	NA	5	0	2	0	0
642	0	0	53	0	2719	NA	5	0	1	0	0
643	1	0.402345742	37	0	0.337622356	12667	16	0	2	0	3
644	0	0.143316879	70	3	4294	NA	16	0	5	1	0
645	0	0.334295645	48	0	5368	NA	13	0	2	0	0
646	0	0.010350125	52	0	0.258589038	3812	6	0	1	0	1
647	0	0.336596148	36	0	0.08037225	1181	2	0	0	0	0
648	0	0.044842922	51	0	0.23358954	11318	5	0	1	0	2
649	0	0.007712359	69	0	0.156614462	3000	6	0	0	0	0
650	0	1.011332794	52	0	10.80049875	400	8	0	1	0	2
651	0	0.066778859	67	0	84	NA	7	0	0	0	NA
652	0	0	36	0	0.370418677	7666	4	0	1	0	2
653	0	0	49	0	0.62273579	1600	10	0	1	0	1
654	1	0.314685703	51	3	0.160317928	16984	13	0	2	1	4
655	1	0.149314411	36	0	0.558320373	4500	9	0	3	0	0
656	0	0	33	0	0.238212526	2841	9	0	0	0	0
657	0	0.037849716	62	0	0.162891787	8741	15	0	1	0	0
658	0	0.281115558	69	0	0.162186181	4500	10	0	0	0	1
659	0	0.005196165	70	0	1514	NA	9	0	2	0	0
660	0	0.133688867	49	0	0.093522183	4800	7	0	0	0	2
661	0	0.321457844	46	2	1434	NA	6	0	1	1	0
662	0	0	65	0	0.416379181	6666	10	0	1	0	0
663	0	0.827151013	56	1	0.219974716	8700	8	0	0	1	1
664	0	0.442798278	51	0	2092	NA	11	0	0	0	2
665	0	0.025082109	57	0	0.360879707	3000	15	0	0	0	0
666	0	0.578849363	48	0	0.367553674	6613	10	0	1	0	1
667	0	0.020703507	47	0	0.645104381	3400	6	0	1	0	2
668	1	1.248751249	33	0	0.175120326	2700	3	2	0	0	0
669	0	0.9999999	75	0	8	NA	2	0	0	0	0
670	0	0.569824212	40	0	0.361421689	11000	18	0	1	0	2
671	0	0.914867126	40	0	0.517037339	4900	7	0	1	0	1
672	0	0.0382584	68	0	0.009831695	6000	12	0	0	0	0
673	0	0.964561473	35	4	0.305839582	4400	10	3	0	2	2
674	0	0.02731285	65	0	0.325335893	2083	6	0	0	0	0
675	0	0.035605591	81	0	0.017260735	7125	7	0	0	0	0
676	0	0.004595129	52	0	0.39095856	7166	7	0	1	0	0
677	0	0.042534081	69	0	0.009690817	6500	4	0	0	0	1
678	0	0.12136536	34	0	3300	NA	5	0	2	0	0
679	0	0.180162143	40	0	0.448326668	9501	15	0	2	0	1
680	0	0.054940099	35	0	0.662152897	5833	10	0	2	0	2
681	0	0.099724251	80	0	0.008908281	11000	3	0	0	0	0
682	0	0.030513202	68	0	48	NA	6	0	0	0	0
683	0	0.175434349	47	0	0.149077983	4500	9	0	0	0	0
684	0	0.019883105	64	0	0.028599606	6083	16	0	0	0	0
685	1	0.990764426	36	2	0.361340457	4117	4	0	0	0	1
686	0	0.386084012	49	0	0.166452387	11666	17	0	0	0	3
687	0	0.008287427	55	0	0.115171335	7032	8	0	1	0	0
688	0	0.058687793	35	0	0.335733141	8333	6	0	2	0	2
689	0	0.091106715	63	0	0.035418452	3500	5	0	0	0	0
690	0	0.023114333	64	0	0.513540291	9083	16	0	3	0	0
691	0	0.083426677	64	0	0.037871034	2930	7	0	0	0	2
692	0	0.529411765	26	1	0.017052375	820	1	0	0	0	0
693	0	0.192722211	77	0	0.457930642	7035	21	0	1	0	1
694	0	0.9999999	32	0	0.177955511	4000	1	2	0	0	0
695	0	0.359412083	54	0	3.874422899	1082	22	0	1	0	0
696	0	0.106517279	40	0	0.263151915	8800	17	0	3	0	4
697	0	0.07953842	53	0	2958	NA	9	0	1	0	2
698	1	2066	58	0	0.27112148	6000	8	1	1	0	1
699	0	0.01239876	50	3	0.207518671	11916	4	0	1	0	0
700	0	0.9999999	56	0	0.00711943	12500	2	0	0	0	2
701	0	0.003938695	75	0	0.199949219	7876	11	0	2	0	0
702	0	0.520418652	36	1	0.232918082	2648	5	0	0	0	3
703	0	0.160899231	33	0	0.182363527	3333	13	0	0	0	0
704	0	0.252505361	52	0	0.442592901	6000	13	0	1	0	2
705	0	0.035670256	62	0	0.427674963	9401	9	0	4	0	0
706	0	0.046747539	60	0	1.012368584	3233	13	0	2	0	0
707	0	0.009639594	52	0	0.262440354	4400	5	0	0	0	0
708	0	0.986400389	36	0	0.441868921	11000	8	0	2	0	0
709	0	0.092392056	71	2	0.190062303	13000	7	0	1	0	0
710	0	0.001019592	83	0	0.00019996	5000	10	0	0	0	0
711	0	0	76	0	272	0	6	0	0	0	0
712	0	0.045516721	40	0	0.090355422	11000	12	0	0	0	3
713	0	0.245744673	46	0	0.585122242	6707	21	0	1	0	3
714	0	0.292159285	78	0	605	NA	5	0	0	0	0
715	0	0.9999999	36	0	631	NA	1	0	1	0	0
716	0	0.016142473	76	0	0.668266347	1666	11	0	1	0	0
717	0	0.759286581	41	1	0.408475574	1698	4	0	0	0	1
718	0	0.189734189	60	0	0.04587156	2833	2	0	0	0	0
719	0	0.049082484	63	2	0.361938937	16441	12	0	1	0	1
720	0	1.163184115	52	0	0.319174181	4213	7	0	0	0	0
721	0	0.238016933	58	0	0.601017347	7666	5	0	3	0	0
722	0	0.410946459	56	0	0.712194056	4575	16	0	1	0	0
723	0	0.476535633	33	0	0.312937413	5000	4	0	1	0	0
724	0	0.37504998	64	0	0.011195522	2500	4	0	0	0	0
725	0	0.116188171	33	0	0.043739065	4000	9	0	0	0	0
726	0	0.018497695	40	0	64	NA	13	0	0	0	0
727	0	0.254548841	56	0	0.461357487	8500	15	0	2	0	4
728	0	0.013574112	60	0	0.711075819	17000	11	0	3	0	0
729	0	0.9999999	27	0	0.260763359	3274	3	0	0	1	2
730	0	0.029185402	41	0	0.336295473	3600	5	0	1	0	0
731	0	0.985092264	48	0	0.376905611	3082	4	0	1	0	0
732	0	0.011904653	69	0	1653	NA	20	0	2	0	0
733	0	0	39	0	0.735131912	6708	13	0	2	0	2
734	0	0.312877738	36	0	0.23072116	8000	28	0	0	0	0
735	0	0.714892819	34	1	0.870354941	6000	8	0	1	0	0
736	0	0.060867801	50	1	3074	NA	15	0	1	0	0
737	0	0.141853991	79	0	0.812870978	3200	8	0	2	0	0
738	0	0.073191767	54	0	0.020708083	4490	4	0	0	0	0
739	0	0.473663158	36	1	0.650674663	2000	8	0	0	0	0
740	1	0.987668722	39	5	0.691279186	5010	14	0	2	0	2
741	0	0.061214562	35	0	0.453692681	21000	7	0	2	0	0
742	0	0.475252475	38	1	0.428628549	2500	8	1	0	0	0
743	0	0.243842974	52	0	1321	NA	9	0	1	0	2
744	0	0.621468927	24	0	0.010079194	4166	3	0	0	0	0
745	0	0.084589254	76	0	0.044093178	1201	8	0	0	0	0
746	0	0.880239982	41	0	1290	NA	6	0	0	0	2
747	0	0.087182563	74	0	0.080495356	1291	6	0	0	0	0
748	0	0.111715105	47	0	0.315173697	16666	12	0	2	0	3
749	0	0	57	0	0.335066493	10000	11	0	2	0	3
750	0	0	63	0	0.052672049	2600	3	0	0	0	1
751	0	0	62	0	17	NA	4	0	0	0	0
752	0	0.659178931	39	0	0.285324697	5866	6	0	1	0	1
753	0	0.101012576	51	0	0.34037277	12500	21	0	2	0	1
754	0	0.471803323	60	0	0.365787835	9633	12	0	1	0	1
755	0	0.224822486	68	0	2284	NA	6	0	2	0	0
756	0	0.249922521	63	2	0.254313231	19416	18	0	2	0	1
757	0	0	55	0	0.369192131	7166	7	0	3	0	1
758	0	0.066285085	58	0	0.228999349	9213	7	0	1	0	0
759	0	0.025711593	55	0	0.540702656	3500	8	0	1	0	2
760	0	0.901509849	33	1	0.128132981	23100	8	1	1	0	0
761	1	0.02331266	58	0	0.632371083	4052	13	1	2	0	0
762	0	0.048540543	55	1	0.215576215	5700	9	0	1	0	0
763	0	0.077358439	44	0	0.324267573	10000	10	0	2	0	0
764	0	0.082452074	57	0	0.89117395	3500	12	0	1	0	1
765	0	0.9999999	65	0	0	615	3	0	0	0	0
766	0	0.14060251	56	0	0.049700447	11850	11	0	0	0	2
767	0	0.357285429	25	0	0.001723544	2900	1	0	0	0	0
768	0	0.002140517	89	1	5	0	4	0	0	0	0
769	1	0	32	0	0.44187375	3500	5	0	1	0	2
770	0	0.072377744	48	0	0.399050079	12000	9	0	2	0	0
771	0	0.228591229	38	1	0.181233062	2951	4	0	0	0	0
772	0	0	58	0	526	NA	5	0	1	0	1
773	0	0	59	1	0.531464095	7881	8	2	1	0	0
774	0	0.9999999	32	0	0.132716821	4000	1	0	0	0	1
775	0	0.015293506	50	0	0.372513562	1105	13	0	0	0	0
776	0	0.059183801	26	0	0.067061144	1520	7	0	0	0	0
777	0	0.211859605	55	0	0.128716003	6323	8	0	0	0	1
778	0	0.014688043	82	0	13	NA	4	0	0	0	0
779	0	0.019415751	62	0	1203	NA	9	0	1	0	0
780	0	0.012236873	46	0	1189	NA	6	0	1	0	0
781	0	0.917428326	66	1	2410	NA	7	1	2	0	0
782	0	0.716283716	46	0	0.26775232	5280	10	0	2	0	2
783	0	0.00054943	59	0	0	2236	4	0	0	0	0
784	0	0.004680652	29	0	0.057388522	5000	4	0	0	0	0
785	0	0.4275909	39	0	0.342354782	10862	14	1	2	0	0
786	0	0.982477859	36	0	0.508163945	3000	3	0	1	0	0
787	0	0.083486086	71	0	0.170705631	5611	4	0	1	0	0
788	0	0.01087466	82	0	0.001287001	7769	6	0	0	0	0
789	0	0.014646523	26	0	0.121568627	1274	7	0	0	0	0
790	1	1.008506531	58	3	3265	NA	20	0	0	1	0
791	0	0.537596973	68	0	1591	NA	8	0	1	0	NA
792	0	0.994428754	42	0	2336	0	11	0	2	0	3
793	0	0.556142972	58	0	0.177274242	3000	2	0	0	0	0
794	1	1.25748503	26	0	0.129805014	1794	1	2	0	1	0
795	0	0.031593681	33	0	523	NA	3	0	0	0	0
796	0	0.35407131	51	0	0.053521541	6800	5	0	0	0	0
797	0	0.075627307	60	0	0.193786454	8400	9	0	1	0	0
798	0	0.002965614	29	0	0.515939338	3230	8	0	1	0	0
799	0	0.020390558	79	0	0.225861336	2350	5	0	0	0	0
800	0	0.04564894	27	0	0.274952015	4167	21	0	1	0	0
801	1	0.962946947	50	0	0.68127587	4106	8	0	1	1	0
802	0	0.160226787	31	0	0.356018715	2350	5	0	0	0	0
803	0	0	45	0	0.735816454	10416	11	0	4	0	1
804	0	0.067400749	26	0	0.166517857	4479	10	0	0	0	0
805	0	0.134374585	63	0	111	NA	2	0	0	0	0
806	0	0.9999999	40	0	11	NA	0	0	0	0	0
807	0	0.013218661	57	0	0.085321957	7500	10	0	1	0	0
808	0	0.000358843	54	0	0.720069983	4000	11	0	0	0	0
809	0	0.975146408	33	0	0.332280979	3800	4	0	0	0	2
810	0	0.255610417	54	0	0.528550512	3414	9	0	1	0	1
811	0	0.9999999	24	0	0	3833	1	0	0	0	0
812	0	0.682708972	41	4	0.38708711	13350	8	0	4	0	1
813	0	0.101551406	47	0	228	NA	6	0	0	0	0
814	0	0.013105862	76	0	736	NA	15	0	1	0	0
815	0	0	87	0	2	NA	2	0	0	0	NA
816	0	0.040536902	34	0	0.644091034	3646	11	0	1	0	0
817	0	0	46	0	0.107878122	3642	11	0	0	0	4
818	0	0.013375668	82	0	0.002606106	8057	7	0	0	0	0
819	0	0.9999999	48	0	0.165213329	6421	0	1	0	0	2
820	0	0.19877594	83	0	0.217065334	2800	9	0	0	0	0
821	0	0.053596215	86	0	68	NA	6	0	0	0	1
822	0	0.178964154	56	0	0.552930754	6772	6	0	1	0	1
823	0	0	90	0	0	NA	3	0	0	0	NA
824	0	0.003550639	73	0	415	NA	11	0	0	0	0
825	0	0.715720439	33	0	1.002499107	2800	8	0	2	0	0
826	0	0.011343376	85	0	13	NA	5	0	0	0	NA
827	0	0.158100266	45	2	0.475322703	3950	19	0	1	0	1
828	0	0.626266154	56	0	0.142385321	5449	5	0	0	0	0
829	0	0	31	0	0.432783608	2000	9	0	1	0	0
830	0	0.48268786	30	0	0.264841895	8000	9	0	2	1	1
831	0	0.524915836	32	0	969	NA	6	0	0	0	0
832	0	0.335445712	40	0	0.344679838	4200	6	0	2	1	0
833	0	0.001876594	79	0	0.01332778	2400	10	0	0	0	0
834	0	0.235225157	37	0	0.335036659	4500	5	0	1	0	1
835	0	0	63	0	779	NA	6	0	1	0	0
836	0	0	28	0	852	NA	3	0	0	0	NA
837	0	0.001901275	69	0	0	5455	6	0	0	0	0
838	0	0.107720423	47	0	0.216280839	9200	12	0	3	0	2
839	0	0.01339933	71	0	0.01283697	2336	3	0	0	0	1
840	0	0.064097861	56	0	1387	NA	11	0	1	0	0
841	0	0.547124146	40	0	0.121319069	9066	6	0	0	0	4
842	0	0.292567833	64	0	2231	0	5	0	1	0	0
843	0	0.157137145	59	0	0.264911696	3000	8	0	0	0	1
844	0	0.042202964	28	0	0.286158631	4500	6	0	1	0	0
845	0	0.734284381	45	0	11311	0	6	0	2	1	0
846	0	0.835311508	31	1	0.332527053	7854	9	0	1	0	0
847	0	0.5112397	58	0	0.963084409	9453	13	0	3	0	1
848	1	0	44	0	6046	NA	9	0	3	0	0
849	0	0.037477248	37	0	0.079193665	8333	9	0	0	0	0
850	0	0	68	0	0.090386385	4347	5	0	0	0	0
851	1	0.71976008	47	0	64	NA	2	2	0	0	0
852	0	0.047294357	57	0	0.447142596	5476	14	0	1	0	0
853	0	0.328684508	51	0	1874	NA	6	0	1	0	0
854	0	0.028083912	50	0	0.380976732	3910	20	0	0	0	3
855	0	0.003888457	74	0	4	NA	3	0	0	0	0
856	0	0.009654537	73	0	0.122830656	18553	6	0	1	0	1
857	1	0.778719498	81	0	0.53801306	4287	11	0	2	0	0
858	0	0	58	0	0.411084131	7000	10	0	2	0	1
859	0	0.054449206	87	0	19	NA	1	0	0	0	0
860	0	0.173784093	55	0	0.196142489	15916	14	0	3	0	0
861	0	0.457154579	50	0	0.103425118	13400	7	0	0	0	2
862	0	0.119460647	34	0	0.32224953	6916	5	0	1	0	0
863	0	0.717853471	67	0	3174	NA	15	0	3	0	0
864	0	0.607205622	63	0	4627	NA	15	0	1	0	0
865	0	0.276593085	62	0	0.121835693	19000	8	0	1	0	0
866	0	0.128419662	59	0	0.226433961	11000	10	0	1	0	0
867	0	0.059356682	32	0	4121	NA	10	0	1	0	0
868	0	0.000237284	64	0	0.427787663	6743	10	0	1	0	0
869	0	0.738420926	72	0	2367	NA	11	0	1	0	0
870	0	0.086492476	64	0	0.074734316	5833	8	0	1	0	1
871	0	0.222472191	30	0	0.589815683	3200	4	0	1	0	0
872	0	0.035754761	79	0	0.00829363	5666	5	0	0	0	1
873	0	0.003986049	81	0	0.207164676	3600	10	0	1	0	0
874	0	0.093741762	41	2	0.718171926	3675	10	0	3	0	2
875	0	0.231979494	58	0	0.373801016	10633	28	0	4	0	0
876	0	0.105969699	55	0	3063	NA	8	0	1	0	0
877	0	0.041411471	45	0	0.008456176	8750	3	0	0	0	3
878	0	0.223055966	44	0	0.430297475	12000	13	0	2	0	3
879	0	0.452864285	49	0	0.330947228	6006	10	0	1	0	1
880	0	0.016031741	74	0	1202	NA	4	0	1	0	NA
881	0	0.9999999	26	0	0.137820513	1871	1	0	0	0	0
882	0	0.15189171	59	0	0.301074556	15075	13	0	2	0	0
883	0	0.606025418	39	3	0.375647341	7916	10	0	2	0	2
884	0	0.075168462	48	0	1421	NA	3	0	1	0	0
885	0	0.061833522	49	0	2788	NA	6	0	2	0	0
886	0	0.010186243	47	0	0.022504141	24750	7	0	0	0	2
887	0	0.515975688	28	0	0.679853795	4650	14	0	1	0	0
888	0	0.347921078	42	0	0.373740482	13000	11	0	2	0	2
889	0	0.108983159	53	0	0.31035201	4800	10	0	1	0	0
890	0	0.165720783	68	0	0.311916978	8575	10	0	1	0	0
891	0	0.194625748	31	1	0.283571758	4333	20	0	0	0	0
892	0	0.48987523	34	0	0.319171724	2800	3	0	0	0	1
893	0	0.958820874	56	0	0.236573549	9700	12	0	1	0	1
894	0	0.799018271	30	0	1.298161471	1250	4	0	1	0	0
895	0	0.011505437	52	0	0.274253271	4050	9	0	1	0	0
896	0	0.819115784	54	0	0.528381219	2853	7	0	1	0	0
897	0	0	39	0	0.551779288	2500	7	0	2	0	0
898	0	0.122544324	57	0	0.42893401	4333	9	0	1	0	1
899	0	0.667833042	60	0	81	NA	2	0	0	0	0
900	0	0.3882572	45	0	1.112942122	4975	13	0	4	0	1
901	0	2.258964143	33	2	0.032483758	2000	1	1	0	0	2
902	0	0.013767118	64	0	2004	NA	10	0	2	0	0
903	0	0.187797808	85	0	790	NA	6	0	0	0	0
904	0	0.9999999	34	1	0	5400	0	1	0	0	0
905	0	0.037379559	37	0	0.333851794	9000	11	0	2	0	0
906	0	0.00339983	63	0	0.262694922	2500	5	0	0	0	0
907	0	0.020480494	35	0	1673	NA	10	0	1	0	1
908	0	0.106475741	32	0	0.802308265	2685	5	0	1	0	1
909	0	0.518186405	73	0	0.504887091	8900	17	0	1	0	1
910	0	0.003735788	39	0	0.459166466	4150	10	0	2	0	0
911	0	0.9999999	38	0	2628	NA	6	0	1	0	0
912	0	0.196960608	40	0	0.006959443	4166	1	0	0	0	0
913	0	0.802993617	42	1	0.524458002	9178	9	0	1	0	3
914	0	0.9999999	36	0	0.194963754	2620	3	0	0	0	0
915	0	0.707145775	64	0	3930	NA	13	0	2	0	0
916	0	0.288592785	51	0	0.226213976	10131	4	0	2	0	3
917	0	0.397244161	25	0	0.294852574	2000	5	0	0	0	0
918	0	0.197440895	36	0	777	NA	3	0	1	0	NA
919	0	0.004884836	34	0	0.474904943	5259	11	0	2	0	2
920	1	1.362141746	73	1	274	NA	2	3	0	1	NA
921	0	0.17545213	55	2	0.27018019	9600	11	0	2	0	0
922	1	0.514353049	39	0	0.984408835	2308	15	0	1	0	1
923	0	0.00069993	83	0	0	10500	4	0	0	0	0
924	0	0.822400231	63	0	0.515793683	2500	12	0	0	0	0
925	0	0.0427599	52	0	7806	NA	21	0	2	0	2
926	0	0.222506167	59	0	0.271467415	11400	9	0	2	0	0
927	0	0.391045602	24	0	0.069040925	3200	11	0	0	0	0
928	0	0.028775625	44	0	0.137224283	5122	4	0	0	0	0
929	0	0.477367751	36	0	0.339874121	2700	6	0	0	0	0
930	0	0.018538176	74	0	1184	NA	8	0	1	0	0
931	0	0.041366785	45	0	0.224577542	10000	8	0	0	0	2
932	0	0.994269551	41	0	2809	NA	5	0	2	0	0
933	0	0.127159603	63	0	0.454098361	5489	20	0	4	0	0
934	0	0.610408703	41	1	0.064417178	2933	7	0	0	0	2
935	0	0.156645781	45	1	0.560214893	6700	8	0	2	0	2
936	0	0.526201662	54	4	0.343546258	25000	9	0	3	0	1
937	0	0.03737868	76	1	0.372787227	2880	8	0	1	0	0
938	0	0.163750645	65	0	0.266873313	10000	13	0	1	0	0
939	0	0.086382723	38	0	2615	NA	6	0	1	0	NA
940	0	0.9999999	47	0	0.370691923	3800	6	0	0	0	1
941	0	0.029132576	68	0	0.008222093	10337	10	0	1	0	1
942	0	0.153646677	34	0	1.220066377	3916	7	0	2	0	0
943	0	0.083781617	46	0	0.421201915	5640	16	0	1	0	2
944	1	0.913773615	55	2	0.881655429	4300	17	0	2	0	1
945	0	0.251284106	34	0	0.75145816	8400	18	0	4	0	0
946	0	0.072587125	29	0	0.046662778	12000	15	0	0	0	0
947	0	0	35	0	0	1500	3	0	0	0	0
948	0	0.133613717	43	1	0.421048246	12000	14	0	3	1	2
949	0	0.001905482	37	0	2.694610778	500	11	0	2	0	2
950	0	0.040547951	74	0	0.020736901	5400	5	0	0	0	0
951	0	0.03452873	55	0	0.514162132	7166	7	0	2	0	1
952	0	0.010441271	72	0	692	NA	7	0	0	0	0
953	0	0	80	1	1589	NA	8	0	1	0	0
954	0	0.001882242	50	0	1.317473011	2500	9	0	2	0	1
955	0	0.015644567	77	0	24	NA	5	0	0	0	NA
956	0	0.630901661	73	0	0.047400612	4577	3	0	0	0	0
957	0	0	52	0	0.257757365	8926	11	0	1	0	2
958	0	0.055228298	48	0	0.146276596	12407	5	0	1	0	0
959	0	0.946508915	44	0	0.148162041	2665	5	0	0	0	1
960	0	0	50	0	0	6400	2	0	0	0	0
961	0	0.833594158	44	0	178	NA	9	0	0	0	0
962	0	0.030327811	70	0	1934	NA	11	0	2	0	0
963	0	0.194273425	53	0	817	NA	13	0	0	0	3
964	0	0	70	0	0	3500	6	0	0	0	0
965	0	0.205655719	36	0	2082	NA	13	0	2	0	0
966	0	0.235752849	63	0	724	NA	3	0	0	0	0
967	0	0.029878794	50	0	0.318734063	13333	11	0	3	0	1
968	1	1.004421666	48	3	0.605098725	4000	10	0	2	0	1
969	0	0.154955579	62	1	2446	NA	4	1	1	0	0
970	0	0.016658432	53	0	0.315187201	9000	6	0	1	0	0
971	0	0.475841386	43	0	0.198811453	1850	2	0	0	0	3
972	0	0.061439281	58	0	0.498692509	6500	19	0	4	0	1
973	0	0.527904017	67	0	486	NA	4	0	1	0	0
974	0	0.319378527	59	0	0.156959213	6300	22	0	0	0	0
975	0	0.9999999	55	0	0.167543201	5323	1	1	0	1	2
976	0	0.077910174	82	0	162	NA	2	0	0	0	0
977	0	0.278636315	47	0	0.587361677	6867	22	0	1	0	4
978	0	0.352319991	43	0	0.246784845	8630	8	0	0	0	1
979	0	0.256314605	58	3	1.511162946	3000	24	0	2	0	0
980	0	0	41	0	0.346902339	5600	4	0	1	0	0
981	0	0.066113797	63	0	0.621679828	9750	24	0	2	0	2
982	0	0.749133564	50	2	0.432119554	4750	17	0	1	0	0
983	0	0.041992219	32	0	85	NA	7	0	0	0	0
984	0	0.212785199	37	1	106.2727273	21	6	0	2	0	4
985	0	0.951209758	36	0	0.061445262	2310	2	0	0	0	2
986	0	0.700331051	45	1	0.546448087	8966	11	0	2	0	1
987	0	0	26	0	346	NA	8	0	0	0	0
988	0	0.019327552	80	0	0.180763847	5000	11	0	0	0	0
989	1	0.878245498	40	0	0.18141723	3400	5	0	0	0	1
990	0	0.066928871	35	0	0.611050027	3637	5	0	1	0	2
991	0	0.110327321	52	0	0.313439924	6316	16	0	2	0	1
992	1	0.228742911	38	2	3558	NA	19	0	3	0	2
993	0	0.691722293	78	0	0.691183331	6430	6	0	2	0	0
994	0	0.275946359	57	1	0.283411686	13400	10	0	1	0	0
995	0	0.037454421	57	0	0.355043926	3300	17	0	1	0	0
996	0	0.357684244	32	1	710	NA	6	0	0	0	0
997	0	0.102950576	43	1	0.252274773	10000	18	0	3	0	3
998	0	0.9999999	60	1	10.17127624	3000	4	0	1	1	0
999	0	0.040283239	54	0	0.135553584	12400	11	0	1	0	0
1000	0	0.352989385	59	1	0.43955635	13433	18	0	2	0	2
1001	0	0.666948696	56	0	0.185055253	5700	7	0	0	0	0
1002	0	0.181442474	32	0	0.067877957	8750	2	0	0	0	0
1003	0	0.863213679	29	0	0.102670277	18836	4	0	1	0	2
1004	0	0.093632815	68	0	0.306846806	4366	6	0	2	0	0
1005	0	0	50	0	0	6250	4	0	0	0	0
1006	0	0.479013137	36	0	0.531659631	4500	14	0	1	0	2
1007	0	0.257067036	37	0	0.291809152	6140	6	0	0	0	4
1008	0	0.02403549	63	0	19	NA	2	0	0	0	0
1009	0	0.9999999	42	0	0.217236784	2250	1	0	0	0	2
1010	0	0.001890458	47	3	0.268693009	6579	15	0	2	2	1
1011	0	0.399033876	32	0	0.433893685	2200	7	0	0	0	0
1012	0	0.9999999	31	0	0.047961631	3335	2	0	0	1	4
1013	0	0.245930854	39	0	0.537720414	5500	11	0	1	0	1
1014	0	0.003957859	52	0	2574	NA	11	0	1	0	2
1015	0	0.408690635	46	0	1.055195584	4166	12	0	2	0	0
1016	0	0.897369039	57	0	2910	NA	16	0	0	0	0
1017	1	0.017558727	47	0	0.53540175	2513	10	1	1	0	0
1018	0	0.115428519	41	0	0.278969295	6480	12	1	1	1	0
1019	0	0.83983667	49	0	3308	NA	8	0	2	0	1
1020	0	0.004384128	36	0	0.637788225	4466	11	0	1	0	1
1021	0	0.383952208	35	0	0.498566762	15000	18	0	2	0	0
1022	0	0.039609476	50	0	1132	NA	13	0	0	0	0
1023	0	0.02464305	75	0	0.009947892	4221	10	0	0	0	1
1024	0	0.9999999	32	0	0.178302196	3050	1	0	0	1	2
1025	0	0.284499685	66	0	1408	NA	8	0	0	0	1
1026	0	0.9999999	38	1	0.134071341	6503	1	0	0	0	3
1027	0	0.224507069	58	0	1068	NA	8	0	1	0	0
1028	0	0.643133922	47	0	0.158997955	7823	3	0	0	0	0
1029	0	0.149037887	44	0	0.288725647	3130	8	0	1	0	1
1030	1	0.546513871	35	0	0.93824256	8500	17	0	4	0	2
1031	0	0.546015655	39	0	0.407318536	5000	8	0	1	0	0
1032	0	0.14938018	54	1	0.428758481	8400	14	0	1	0	1
1033	0	0.135083219	58	0	0.065139307	10300	7	0	0	0	2
1034	0	0.016221174	65	0	0.194925029	2600	9	0	2	0	3
1035	0	0.068038735	55	0	2.496503497	1000	6	0	1	0	2
1036	0	0.038660566	71	0	0.308086489	8000	7	0	1	0	0
1037	0	0.258812185	35	0	3947	NA	4	0	1	0	0
1038	0	0.033458036	80	0	0.431051723	11000	6	0	2	0	0
1039	0	0.9999999	27	0	0.153061224	2253	3	0	0	0	0
1040	0	0.391214634	39	1	0.287181335	11100	8	0	2	0	2
1041	0	0.377915278	51	0	0.061148228	8830	5	0	0	0	1
1042	0	0.098407733	47	0	0.069744476	8100	6	0	0	0	2
1043	0	0.039686202	46	0	7	NA	6	0	0	0	1
1044	0	0.9999999	51	1	35	NA	0	1	0	0	0
1045	1	0.829560586	34	1	0.248187953	4000	6	0	1	0	2
1046	0	0.631259134	39	0	0.273340433	2816	7	0	0	0	0
1047	0	0.034384238	84	0	51	NA	10	0	0	0	0
1048	0	0.054537616	53	0	0.266824339	4650	10	0	1	0	0
1049	0	0.50009998	34	0	0.211071821	8200	3	0	1	0	0
1050	0	0.112820211	81	0	0.312868713	10000	6	0	1	0	0
1051	0	0.012538557	63	0	0.38510101	2375	12	0	2	0	0
1052	0	0.996101804	43	0	2.579171742	1641	9	0	2	0	3
1053	1	0.232226657	59	6	6.094452774	2000	16	2	1	2	1
1054	0	0.048037041	30	0	2235	NA	5	0	1	0	0
1055	0	0.530405318	61	1	0.469418849	13782	22	0	2	0	0
1056	0	0.520689428	68	3	0.777370438	6000	9	0	3	0	0
1057	0	0.022135842	48	0	0.003547815	6200	2	0	0	0	1
1058	0	0.101790219	63	0	0.042235495	2343	5	0	0	0	0
1059	0	0.323481841	26	0	262	NA	3	0	0	0	0
1060	0	0.014466655	51	0	0.262962153	4570	28	0	2	0	0
1061	0	0.022420519	72	0	1004	NA	6	0	1	0	0
1062	0	0.002349883	66	0	0.39184953	5103	5	0	2	0	0
1063	0	0.1925349	38	0	0.225741941	12500	12	0	2	0	0
1064	0	0.251804415	66	0	0.611755298	2500	7	0	1	0	0
1065	0	0.088911089	35	0	0.000526177	3800	3	0	0	0	0
1066	0	0.987743331	50	0	0.4474	9999	13	0	2	0	0
1067	0	0.9999999	68	1	0	NA	0	1	0	0	0
1068	0	0.030761368	62	0	0.015661446	3000	5	0	1	0	0
1069	0	0.218991588	54	0	0.586137954	3000	13	0	1	0	0
1070	0	0.9999999	38	0	0.110878973	6700	3	0	0	0	3
1071	0	0	45	0	0.365016502	7574	10	0	2	0	1
1072	0	0.002072256	58	0	0.210742857	8749	12	0	2	0	0
1073	0	0.223967181	49	0	1632	NA	8	0	1	0	0
1074	0	0.220201834	34	0	0.462354974	4050	10	0	2	0	1
1075	0	0.788340389	43	0	0.099845092	7100	3	0	0	0	1
1076	0	0.034754891	73	0	1627	NA	12	0	2	0	0
1077	0	0	43	0	0.281729338	15450	10	0	2	0	5
1078	0	0.148225606	63	0	1313	NA	11	0	2	0	0
1079	0	0.68028326	80	0	0.42985336	4568	6	0	1	0	0
1080	0	0.179110121	41	0	0.27491843	9500	10	1	1	0	2
1081	0	0.211367652	60	0	0.24045329	10500	19	0	2	0	0
1082	0	0.012987013	22	0	0	0	2	0	0	0	0
1083	0	0.247135843	34	0	0.090524087	5666	3	0	0	0	1
1084	0	0.9999999	43	0	0.129623459	3000	1	0	0	0	0
1085	1	0.00073798	41	0	0.493126718	4000	4	0	1	0	2
1086	0	0.946978196	34	0	0.335438375	9500	12	0	2	0	2
1087	0	0.866344471	34	0	0.14802475	2100	1	0	0	0	0
1088	0	0	87	0	0.067381539	6900	4	0	0	0	1
1089	0	0.9999999	66	0	0.229471417	11142	6	0	1	0	0
1090	0	0.096113878	41	0	0.224395714	8025	10	0	0	0	4
1091	0	0	37	0	0.372395469	7150	3	0	2	0	2
1092	1	0.9999999	41	0	219	NA	1	2	0	1	NA
1093	0	0.275326535	66	1	0.38317757	5884	17	0	1	0	0
1094	0	0.595112469	33	0	0.378525482	2020	3	0	0	0	0
1095	0	0.026147183	67	0	0.329780147	1500	7	0	1	0	0
1096	0	0.28927034	48	0	0.691654173	2000	7	0	1	0	2
1097	0	0.040423812	61	0	28	NA	6	0	0	0	0
1098	0	0.223677632	67	0	0.326283407	5200	4	0	1	0	2
1099	0	0.077246781	32	0	0.368421053	4084	7	0	1	0	0
1100	0	0.328303003	59	1	0.480057771	9000	9	0	2	0	0
1101	0	0.572324438	50	0	1.052171197	3200	12	0	1	0	3
1102	0	0.966275454	37	0	0.683523654	4290	8	0	1	0	2
1103	0	0.075327056	62	0	0.071378477	12832	7	0	1	0	0
1104	0	0.011073664	52	0	0.012372578	12850	4	0	0	0	3
1105	0	0.369171682	82	0	0.048228914	26000	12	0	1	0	0
1106	0	0.960431398	63	0	0.31506036	5052	3	0	1	0	1
1107	0	0.123471362	63	0	0.364188164	2635	6	0	1	0	1
1108	0	0.127493625	64	0	0.09438021	14875	6	0	2	0	1
1109	0	0.087910156	54	0	0.520623969	20000	8	0	3	0	2
1110	0	0.083766009	53	0	0.34210815	9116	6	0	2	0	1
1111	0	0	78	0	396	NA	3	0	0	0	NA
1112	0	0.48092721	62	0	1.031724668	5200	14	0	3	0	1
1113	0	0.009917446	64	0	0.447430975	5468	12	0	2	0	0
1114	0	0.9999999	37	0	0.377631696	11256	11	0	2	0	1
1115	0	0.078754404	30	0	2129	NA	6	0	2	0	0
1116	0	0.135042385	71	0	0.017903057	10500	14	0	0	0	0
1117	0	0.007999878	65	0	15	NA	13	0	0	0	0
1118	0	0.099190841	57	0	0.604398743	3500	9	0	2	0	0
1119	0	0.29739805	52	0	0.579717373	6014	8	0	1	0	3
1120	0	0.307191593	39	0	0.607185223	5900	5	0	2	0	0
1121	0	0.044225262	39	0	1776	NA	4	0	2	0	0
1122	0	0.125014705	66	2	0.404638145	2500	4	0	1	0	0
1123	0	0.004104171	55	1	1	0	5	0	0	1	0
1124	0	0.013713796	47	0	0.401267976	6466	6	0	2	0	0
1125	0	0.267352626	72	0	0.426685865	4166	10	0	2	0	0
1126	0	0.163836164	53	1	0.092762895	2500	5	0	0	0	0
1127	0	0.9999999	70	0	0	NA	1	0	0	0	NA
1128	0	0.820545297	45	1	3799	NA	4	0	2	0	2
1129	0	0.428382755	36	0	0.2706115	6573	12	0	1	0	0
1130	0	0.0199992	52	0	0.188452887	4000	6	0	1	0	1
1131	0	0.089146989	45	1	0.25974805	5000	7	0	2	0	0
1132	0	0.612030682	74	2	0.76967187	3138	10	1	2	0	0
1133	0	0	48	0	0.05692407	10838	4	0	0	0	1
1134	0	0.801764544	35	1	0.430314406	2130	5	0	0	1	2
1135	0	0	46	0	0.450288902	5018	9	0	1	0	0
1136	0	0.010751197	76	0	0.117910841	3790	17	0	0	0	0
1137	0	0.901795412	47	1	0.52674524	3308	6	0	1	0	3
1138	0	0	70	0	0.252527295	4945	9	0	1	0	0
1139	0	0.001759965	46	0	0.214688239	5500	5	0	1	0	2
1140	0	0.390088472	39	0	0.326036484	3014	6	0	0	0	0
1141	0	0.007353556	80	0	0.29991431	3500	16	0	0	0	1
1142	0	0.9999999	38	1	17	NA	1	0	0	0	0
1143	0	0.061173533	28	0	0.08997001	3000	3	0	0	0	0
1144	0	0.39142696	58	2	0.384779992	7476	6	0	2	0	0
1145	0	0.132820925	42	0	0.914452555	3424	16	0	2	0	1
1146	0	0.842078961	60	0	0.150494324	2730	10	0	0	0	1
1147	1	0.954449046	55	5	773	NA	7	1	0	3	0
1148	0	0.804681521	43	0	0.533815481	10231	12	0	2	0	4
1149	0	0.751585703	56	0	1.478577549	2333	8	0	2	0	0
1150	0	0.28910532	55	0	0.939430965	5728	17	0	3	0	0
1151	0	0.003157687	32	0	1	NA	1	0	0	0	0
1152	0	0.601758577	36	0	2162	NA	10	0	1	0	2
1153	0	0.684020951	50	0	0.894878706	11500	21	0	3	0	0
1154	1	0.81054584	57	2	1.141452126	3456	29	0	1	1	1
1155	0	0	45	1	0.012529992	3750	8	0	0	0	3
1156	0	0	53	0	0.460725507	3500	7	1	1	1	0
1157	0	0.926059916	48	1	12546	NA	8	0	4	0	0
1158	0	0.17988008	23	0	0.003127443	2557	2	0	0	0	0
1159	0	0.226957563	80	0	0.4375	4079	11	0	1	0	1
1160	0	0.941447055	54	0	1.843949701	4850	15	0	4	0	1
1161	0	0.023237542	58	0	0.812428571	6999	19	0	3	0	1
1162	0	0.01718597	48	0	0.348886815	7500	8	0	3	0	2
1163	0	0.506995336	29	0	0.5029988	2500	6	0	1	1	0
1164	0	0.120355791	59	0	0.151986183	11000	10	0	2	0	0
1165	0	0.247597087	56	0	0.702749471	5200	8	0	1	0	2
1166	0	0.321934593	44	0	1383	NA	7	0	2	0	1
1167	0	0.823059361	71	1	2061	NA	6	1	0	1	0
1168	1	0.902797114	45	3	2788	NA	8	2	1	2	0
1169	0	0.099482078	44	0	0.431368631	5004	7	0	1	0	3
1170	0	0.418397882	58	0	0.414148447	7180	14	0	2	0	0
1171	0	0.537344212	57	0	0.627822789	5800	19	0	1	0	0
1172	0	0.002776037	55	0	0.37584925	7800	11	0	2	0	1
1173	0	0.9999999	82	0	0	1400	0	0	0	0	0
1174	1	0.9999999	71	1	0.313816494	2800	2	0	1	1	0
1175	0	0.317047101	65	0	0.173402868	2300	14	0	0	0	0
1176	0	0.100578252	69	0	2209	NA	11	0	2	0	2
1177	0	0.109278443	54	0	1370	NA	5	0	1	0	0
1178	0	0.012951764	68	0	1968	NA	5	0	1	0	0
1179	0	0.186223251	58	1	0.251769464	8900	11	0	1	0	3
1180	0	0.219540157	31	0	220	NA	4	0	0	0	0
1181	0	0.386875937	48	0	0.119083018	20850	19	0	0	0	2
1182	0	0.809765043	64	0	0.476433476	10777	11	0	1	0	0
1183	0	0.126458612	60	0	263	NA	7	0	0	0	0
1184	0	0.281812558	79	1	0.304637654	10500	16	0	2	0	1
1185	0	0.058309113	70	0	0.723310676	2500	12	0	2	0	0
1186	0	0.075662361	63	0	0.315812527	6848	7	0	2	0	0
1187	1	0.087649402	27	0	0.009995457	2200	2	0	0	1	1
1188	0	0.544761241	58	0	0.592103062	5976	13	0	2	0	1
1189	0	0.099272518	58	0	0.034020012	8494	3	0	0	0	3
1190	0	0.201132761	65	0	0.248417722	7583	9	0	2	0	0
1191	0	0	48	0	0.31834083	2000	5	0	0	0	1
1192	0	0	43	0	0	NA	2	0	0	0	0
1193	0	0.963614554	46	0	0.224283305	3557	5	1	1	0	3
1194	0	0.027130865	43	0	0.256738293	8050	6	0	1	0	1
1195	0	0.081312065	65	1	315	NA	6	0	0	0	NA
1196	0	0.19129696	70	0	0.213109877	10083	15	0	1	0	0
1197	0	0.1031864	75	0	0.136302675	14166	5	0	2	0	0
1198	0	0.9999999	50	0	0.914857386	2348	5	0	1	0	0
1199	0	0.030586236	36	1	0.310935893	2916	5	0	0	0	2
1200	0	0.041084962	64	0	0.264227981	12000	8	0	1	0	0
1201	1	0	36	0	0.157678245	4375	7	0	0	0	2
1202	0	0	48	0	4212	NA	6	0	3	0	0
1203	0	0.375897212	62	0	0.29563096	9017	21	0	1	0	0
1204	0	0.9999999	68	0	0.196745562	1351	3	0	0	0	0
1205	0	0.9999999	59	0	0.020359935	5500	1	0	0	0	1
1206	0	0.096009775	53	0	0.545157068	4583	8	0	1	0	1
1207	0	0	37	1	1898	NA	3	0	1	0	0
1208	0	0.028200734	56	0	0.084599116	5200	10	0	1	0	0
1209	0	0.076703026	41	0	0.388436652	4790	14	0	2	0	0
1210	0	0.227820379	77	0	0.554915922	6600	24	0	2	0	0
1211	0	0	53	0	0	3000	2	0	0	0	1
1212	0	0.019391297	68	0	0.064577141	3700	9	0	0	0	1
1213	0	0.149113358	68	0	0.699205217	4906	8	0	2	0	0
1214	0	0.726759759	55	0	0.65170345	9333	9	0	3	0	2
1215	0	0.099815157	57	0	0.232339826	4260	8	0	1	0	1
1216	0	0.00077776	74	0	0.209539523	13333	6	0	3	0	0
1217	0	0.51835032	73	0	0.685146095	9000	13	0	2	0	0
1218	0	0.083984419	49	0	2461	NA	5	0	2	0	3
1219	0	0.047286367	69	0	0.012931609	7500	5	0	0	0	0
1220	0	0.142122933	54	0	2859	NA	18	0	3	0	1
1221	0	0.058416154	29	0	0.299711296	5541	10	0	0	0	0
1222	0	0.006556256	88	0	6	NA	7	0	0	0	NA
1223	0	0.062081558	28	0	0.012387188	5650	6	0	0	0	0
1224	0	0.9999999	27	0	0.014697237	1700	0	0	0	0	1
1225	0	0	43	0	0.437351223	4620	7	0	1	0	0
1226	0	0.065421016	56	1	0.238432226	1836	9	0	0	0	0
1227	0	0.901408451	27	0	0.15104398	2250	5	0	0	0	0
1228	0	0.072018143	50	0	1.434782609	2000	12	0	1	0	1
1229	0	0.392192869	43	0	0.150205533	9000	8	0	0	0	2
1230	0	0.507497501	68	0	0.012468828	3608	3	0	0	0	0
1231	0	0	37	0	1.687366167	1400	8	0	2	0	0
1232	1	0.9999999	60	1	0.540617473	4566	2	0	1	1	0
1233	0	0.016118843	38	0	0.1247501	2500	12	0	0	0	1
1234	0	0.593788744	63	0	3400	NA	13	0	2	0	1
1235	0	0.9999999	64	0	423	NA	2	0	0	0	0
1236	0	0.361682297	41	0	0.19675058	5600	9	0	0	0	2
1237	0	0.811623025	33	1	0.439755691	1800	8	0	0	0	4
1238	0	0.213456163	64	0	0.735554618	2370	9	0	2	0	0
1239	0	0.002124734	73	0	3256	NA	9	0	1	0	NA
1240	0	0.040253329	54	0	0.401668012	7433	12	0	1	0	2
1241	0	0.443626281	53	0	0.253686578	4000	6	0	0	0	1
1242	0	0.002012856	59	0	1164	NA	2	0	1	0	0
1243	0	0.05575925	62	0	0.014802119	6417	6	0	0	0	0
1244	0	0.007749806	60	0	0.220213749	7578	8	0	1	0	0
1245	0	0.696495633	46	0	0.276620563	6000	10	0	0	0	1
1246	0	0.58069462	39	1	0.785196922	4417	8	0	2	0	0
1247	0	0.120179936	52	1	0.427216786	9912	10	0	3	0	1
1248	0	0.022516958	67	0	1031	NA	5	0	1	0	0
1249	0	0.017594819	52	0	0.306472244	3908	7	0	1	0	1
1250	0	0.9999999	65	1	0.061422414	5567	1	0	0	0	0
1251	0	0	84	0	0	NA	1	0	0	0	0
1252	0	0.465521089	47	0	4085	NA	8	0	1	0	0
1253	0	0.874912509	46	0	0.302199741	8500	4	0	1	0	0
1254	0	0.037273952	63	0	0.953488372	1805	8	0	1	0	0
1255	0	0.141762552	78	0	0.028257457	5732	5	0	0	0	0
1256	0	0.017926392	62	0	0.005187456	4240	6	0	0	0	0
1257	0	0.082238982	30	0	2065	NA	7	0	2	0	NA
1258	0	0.07372713	53	0	0.139694329	7000	16	0	0	0	0
1259	0	0.006145513	74	0	3	NA	2	0	0	0	NA
1260	0	0.06781117	71	0	0.332303218	5500	19	0	2	0	1
1261	1	0.887080965	45	0	0.482275525	4710	4	0	1	1	2
1262	0	0.293687348	31	0	1268	NA	13	0	0	0	0
1263	0	0.030153714	58	0	0.003999	4000	6	0	0	0	0
1264	0	0.414618818	70	0	4681	NA	21	0	2	0	0
1265	0	0.853239735	62	0	0.48771563	1912	4	0	0	0	0
1266	0	0.004195682	45	1	0.478190226	8000	12	0	2	0	1
1267	1	0.767840152	74	3	0.2964495	2900	4	1	0	1	0
1268	1	0.041191762	31	0	0.261369315	2000	3	0	0	0	0
1269	0	0.015200908	63	0	0.007998609	5750	3	0	0	0	0
1270	0	0.006732763	76	0	613	NA	7	0	1	0	NA
1271	0	0.839792644	54	0	0.68240621	3091	9	0	1	0	1
1272	0	0.11327535	54	0	695	NA	5	0	1	0	1
1273	0	0.021418674	57	0	0.281414439	4750	13	0	1	0	1
1274	0	0.924271715	45	4	0.441760601	3725	7	2	0	0	2
1275	0	0.028458411	54	0	0.21915701	9750	22	0	1	0	0
1276	0	0.845719252	50	0	0.323338331	2000	6	0	0	0	1
1277	0	0.9999999	29	0	0.080187299	6833	3	0	0	0	0
1278	1	0.965034965	35	0	0.062791628	7500	2	0	1	1	2
1279	0	0.124366408	53	0	2196	NA	11	0	3	0	4
1280	0	0.033203829	71	0	0.318874019	6500	11	0	1	0	0
1281	0	0.036422035	30	0	1756	1	10	0	2	0	0
1282	0	0.9999999	82	0	278	NA	0	0	0	0	NA
1283	0	0.760016551	48	2	0.917543584	6366	10	0	1	0	1
1284	0	0.9999999	41	0	0.007664112	3000	0	0	0	0	0
1285	0	0.147775796	33	0	430	NA	8	0	0	0	0
1286	1	1.0085156	59	1	2.219737309	5633	23	0	4	0	0
1287	0	0	68	0	0.634674923	1614	9	0	1	0	1
1288	0	0.119775556	31	0	0.041959578	4551	3	1	0	0	0
1289	0	0.251354973	39	1	0.385015331	7500	7	0	1	0	1
1290	0	0.078912031	50	1	0.596621408	6333	7	0	1	0	0
1291	0	0.065464485	80	0	0.006854172	8461	1	0	0	0	0
1292	0	0.018856544	35	1	0.234095738	8000	11	0	0	0	0
1293	0	0.551440662	44	0	0.418147936	6975	14	0	2	0	1
1294	0	0.153327953	61	0	3851	NA	6	0	2	0	1
1295	0	0.020212314	55	0	0.302395774	5300	13	0	1	0	0
1296	0	0.239551535	51	0	0.357444651	5916	10	0	1	0	1
1297	1	0.9999999	34	0	0.254256527	6166	5	1	1	1	2
1298	0	0.024688074	45	0	0.199100928	6895	12	0	1	0	0
1299	0	0.796278584	44	0	2518	NA	6	5	1	2	4
1300	1	0.9999999	30	0	0.015108425	5625	2	0	0	0	1
1301	0	0.623875225	41	0	0.037185126	2500	2	0	0	0	1
1302	0	0.176443529	67	0	0.182522829	9417	15	0	2	0	0
1303	0	0	42	0	0.483205749	6400	3	0	1	0	4
1304	0	0.06769731	75	0	0.082053743	2083	11	0	0	0	0
1305	0	0.330939503	41	3	0.316851482	5500	6	0	1	0	2
1306	0	0.070324183	39	0	0.351426383	10445	12	0	1	0	4
1307	0	0.012739234	70	0	0.008663779	3000	6	0	0	0	0
1308	0	0.007868766	63	0	1448	NA	6	0	1	0	0
1309	0	0.019477727	41	0	0.365306454	6150	12	0	2	0	0
1310	0	0.447465042	59	0	0.496729238	7031	10	0	2	0	2
1311	0	0.987501953	52	0	3844	NA	12	0	2	0	0
1312	1	0.983078225	42	0	0.884470118	4500	17	0	2	0	2
1313	0	0	57	0	0	NA	12	0	0	0	0
1314	1	0.972150876	59	0	1.473797947	1850	12	0	2	0	0
1315	0	0.714456939	49	2	1.60215311	4179	15	0	3	0	3
1316	0	0.021614553	67	0	2290	NA	8	0	1	0	1
1317	0	0.073037127	49	0	0.249922094	6417	8	0	2	0	0
1318	0	0.575314156	59	0	0.653881071	4405	6	0	1	0	0
1319	0	0.086460416	27	0	1.055530875	2250	7	0	2	0	0
1320	0	0.254093195	57	0	0.457734957	5500	12	0	2	0	0
1321	0	0	67	0	0.031403337	2037	4	0	0	0	1
1322	0	0.433365292	32	1	0.619267168	4120	5	0	1	0	1
1323	0	0.122020904	59	0	153	NA	9	0	0	0	0
1324	0	0.288425263	77	0	0.533965245	2531	8	0	1	0	0
1325	0	0.195256512	48	0	0.484398217	5383	20	0	3	0	0
1326	0	0.846574881	45	0	0.158640227	6000	5	0	0	0	2
1327	0	0.123564228	45	0	0.202103511	13215	5	0	1	0	2
1328	0	0.007161678	82	0	3	NA	7	0	0	0	0
1329	0	0.011753293	63	0	0.104972376	3800	3	0	1	0	0
1330	0	0	59	0	1486	NA	4	0	1	0	2
1331	0	0.170685802	50	0	69	NA	5	0	0	0	3
1332	0	0.078534132	49	0	0.380691598	6390	7	0	1	0	0
1333	0	0.160060865	41	1	0.370769853	7416	8	1	1	0	1
1334	0	0.16351208	50	0	0.507061617	8000	14	0	4	0	3
1335	0	0.032008214	73	0	0.226599205	8300	11	0	2	0	0
1336	0	0.994133464	53	1	0.53749837	7666	10	0	1	0	0
1337	0	0.322649069	38	0	0.267259537	4272	5	0	2	0	0
1338	0	0.002983261	80	0	0.00012837	7789	2	0	0	0	0
1339	1	0.617025827	26	0	0.160912815	3417	5	0	0	0	0
1340	1	0.409985282	69	1	0.279980823	14600	15	0	2	0	0
1341	0	0.002427884	77	0	0.238471257	3165	13	0	1	0	0
1342	0	0.173948934	68	0	3015	NA	7	0	2	0	0
1343	0	0.04719764	74	0	0.37567161	9305	8	0	5	0	8
1344	0	0.202774562	59	0	6994	NA	23	0	3	0	2
1345	0	0.087406258	32	0	0.288977727	1750	8	0	0	0	2
1346	0	0	39	0	0.055915527	4166	5	0	0	0	0
1347	0	0.04569372	49	0	0.300174956	4000	14	0	1	0	1
1348	0	0.022780051	53	0	0.323067693	10000	14	0	2	0	1
1349	0	0.036934189	56	0	0.287934952	8362	8	0	1	0	2
1350	0	0	62	0	1463	NA	5	0	1	0	0
1351	0	0.832104651	47	0	0.754365541	11166	18	0	3	0	2
1352	0	0.644710579	27	0	0.087017653	6400	7	0	0	0	0
1353	0	0.472495626	42	0	0.381654964	11250	11	0	3	0	3
1354	0	0	43	0	3278	0	7	0	3	0	0
1355	0	0.017509173	59	0	0.365119461	9500	8	0	2	0	0
1356	0	0.09514671	30	0	0.262804799	7750	9	0	1	0	0
1357	0	0.111327624	32	0	0.37043826	6000	11	0	1	0	1
1358	0	0.279441118	57	0	0.001332889	3000	1	0	0	0	1
1359	0	0.170165967	42	0	0.005084401	4916	2	0	0	0	0
1360	0	0.525349959	44	0	0.265853034	11716	8	0	2	0	1
1361	0	0.00712519	67	1	0.186116269	7000	25	0	1	0	0
1362	0	0.871073356	35	0	0.390764509	7167	12	0	1	0	0
1363	0	0.099145861	72	0	2430	NA	23	0	2	0	1
1364	0	0.074231442	25	0	0.155248456	3400	4	0	0	0	0
1365	0	0.161644287	52	0	0.134433192	6121	8	0	0	0	0
1366	0	0	46	0	0.014388489	833	5	0	0	0	0
1367	0	0.685700235	44	0	0.372925415	5000	10	0	2	0	0
1368	0	0.011834818	47	0	0.684559617	6482	8	0	1	0	2
1369	0	0.018456616	53	0	0.248861238	9000	7	0	2	0	2
1370	0	0	37	0	0.372540812	7166	6	0	1	0	0
1371	0	0.001786497	87	0	0.010723861	1864	10	0	0	0	1
1372	0	0	65	0	7	NA	2	0	0	0	NA
1373	0	0.032924722	65	0	1.034372502	1250	21	0	1	0	0
1374	0	0.200990693	33	0	0.732948234	4500	7	0	1	0	0
1375	0	0.009985653	72	0	0.277165033	9791	8	0	2	0	0
1376	0	0.443944541	65	1	0.662545192	13829	19	0	3	0	1
1377	0	0.113400284	31	0	0.254913728	6664	9	0	2	0	0
1378	0	0	83	0	4	NA	5	0	0	0	0
1379	0	0.081353789	59	0	0.028554343	60200	13	0	1	0	1
1380	0	0.173713417	80	0	0.391101483	6000	7	0	2	0	0
1381	0	0.013095711	55	0	0.363039132	3500	10	0	2	0	0
1382	0	0.01519924	59	0	0.280407101	21910	5	0	4	0	1
1383	0	0.113955442	33	0	0.282588669	8683	7	0	2	0	1
1384	0	0.04296902	60	0	0.016795866	5417	9	0	0	0	0
1385	0	0.022440925	63	0	0.012506724	7435	19	0	0	0	0
1386	0	0.878880524	61	1	0.950642674	3889	19	0	1	0	1
1387	0	0.979195663	61	0	0.320731136	6400	7	0	1	0	0
1388	0	0.029406119	62	1	0.246739697	3833	10	0	0	0	0
1389	0	0	72	0	133	NA	8	0	1	0	0
1390	0	0.171691856	44	1	0.252374763	10000	7	0	2	0	2
1391	0	0.030053276	58	0	937	NA	5	0	1	0	0
1392	0	0.480988269	59	0	0.164019337	11583	18	0	1	0	1
1393	0	0.238235664	70	0	1252	NA	11	0	1	0	0
1394	0	0.006489024	67	0	0.099890231	12753	5	0	1	0	1
1395	0	0.010653436	39	0	0.00252605	3166	2	0	0	0	0
1396	0	0.241621668	40	0	3228	NA	11	0	2	0	0
1397	0	0.9999999	44	0	0.117095508	4585	1	0	0	0	5
1398	0	0.892003484	60	0	3955	NA	12	0	2	0	0
1399	0	0.635388319	44	1	0.429330591	11666	19	0	2	0	4
1400	0	0.018475688	49	0	0.162335066	2500	6	0	0	0	1
1401	1	0.82644118	38	0	0.6536804	5800	9	0	1	0	2
1402	0	0.299786422	76	0	0.138246215	3500	11	0	0	0	0
1403	0	0.654211301	37	0	0.26991654	10543	10	0	3	0	0
1404	0	0.877124547	56	1	0.389627295	14595	11	0	2	0	2
1405	1	0	67	0	0.345825195	16383	20	0	3	0	1
1406	0	0.46273576	64	0	0.575630741	8600	32	0	3	0	0
1407	0	0.9999999	44	0	0.514308746	2480	7	0	1	0	5
1408	0	0.268399353	38	0	0.507758759	6250	12	0	1	0	2
1409	0	0.002304248	73	0	4	NA	5	0	0	0	NA
1410	0	0	61	0	0.248972297	5594	7	0	2	0	0
1411	0	0.103318532	84	0	0.278180455	4000	12	0	0	0	0
1412	0	0.171134801	52	0	2574	NA	12	0	1	0	0
1413	0	0.625696469	50	3	0.55618104	4440	12	0	2	0	2
1414	0	0.00126708	40	0	0.730317064	2806	15	0	2	0	3
1415	0	0.028907777	41	0	0.768520892	3900	6	0	2	0	1
1416	0	0.029542412	82	0	0.018150601	4076	8	0	0	0	0
1417	0	0.10835629	63	0	0.005165806	6000	3	0	0	0	0
1418	0	0.004171309	66	0	0.304592315	3200	8	0	1	0	0
1419	0	0.016865792	63	1	496	NA	10	0	1	0	0
1420	0	0	59	0	0.160813579	6833	9	0	1	0	0
1421	0	0.324715615	58	2	0.104809516	5800	10	0	1	1	2
1422	0	0.080481775	38	0	0.273972603	10000	12	0	1	0	1
1423	1	0	41	1	0.526684164	8000	4	1	2	1	1
1424	0	0.017028691	72	0	0.068935962	8166	22	0	0	0	0
1425	0	0.008288705	64	0	0.002893975	3800	2	0	0	0	0
1426	0	1.089825848	60	1	0.63353639	3118	7	0	1	0	0
1427	0	0.199666147	49	1	0.684568131	10743	15	0	4	0	2
1428	0	0.487837796	41	0	0.249076288	4600	5	0	1	0	2
1429	0	0.003811909	50	0	0.362583537	24090	27	0	5	0	1
1430	0	0.033191773	57	0	0.283543291	5000	17	0	1	0	0
1431	0	0.9999999	34	0	0.196640721	2440	2	0	0	0	5
1432	0	0.3508041	43	0	125	NA	4	0	0	0	0
1433	0	0.9999999	52	0	0.001938402	4642	2	0	0	0	0
1434	0	0.68346203	48	0	0.129354508	3903	4	0	0	0	0
1435	0	0	53	0	1635	NA	6	0	1	0	2
1436	0	0.055606878	65	0	2965	NA	5	0	1	0	1
1437	0	0.380440179	58	0	0.321542384	6275	9	0	1	0	0
1438	0	0	43	0	2022	NA	3	0	1	0	1
1439	0	0	66	0	0.363573148	18694	16	0	5	0	0
1440	0	0.02329767	30	0	0.162629758	2600	6	0	0	0	0
1441	0	0.971002416	46	0	0.498110831	1587	3	2	0	1	0
1442	0	0	48	1	0.143671858	4558	8	0	0	0	0
1443	0	0.286564178	53	0	1.333712265	7916	17	0	7	0	0
1444	0	0.18805926	55	1	0.542411134	5316	19	0	1	0	2
1445	0	0.209546792	39	0	0.100164204	2435	12	0	0	0	0
1446	0	0.477140863	71	0	0.349572725	11350	11	0	3	0	0
1447	0	0.523570467	40	0	0.152938343	8303	7	0	1	0	2
1448	0	0.122830785	46	0	2162	NA	4	0	1	0	0
1449	0	0.2670805	51	0	0.841945289	6250	25	0	3	0	3
1450	0	0.460114066	29	0	558	NA	4	0	0	0	0
1451	0	0.363993614	45	0	0.248252006	13586	6	0	2	0	3
1452	0	0.857122203	64	0	0.469695416	9750	8	0	2	0	0
1453	0	0.027789211	52	0	0.226816225	7666	7	0	2	0	2
1454	0	0.002523689	89	0	1	NA	6	0	0	0	0
1455	0	0.822094232	76	0	325	NA	6	0	0	0	0
1456	0	0.353103186	45	0	0.878525593	6700	22	0	2	0	3
1457	0	0.444218359	44	1	0.478291378	11400	6	0	2	0	0
1458	0	0.673189544	35	0	0.424098921	3800	5	0	1	0	0
1459	0	0.180296867	62	0	1609	NA	11	0	1	0	0
1460	0	0.038953135	62	0	3024	NA	7	0	2	0	0
1461	0	0.55613391	36	0	0.151914167	4100	4	0	0	0	0
1462	0	0.057155929	60	0	0.224294881	6700	10	0	1	0	0
1463	0	0.212957409	61	0	0.49910018	5000	4	0	2	0	0
1464	0	0.037448128	73	0	2498	NA	4	0	2	0	0
1465	1	0.702381432	54	0	0.866732547	14166	21	0	6	0	3
1466	0	0	44	0	2648	NA	12	0	2	0	3
1467	0	0.196222729	67	0	0.158012596	7144	9	0	1	0	0
1468	0	0.620903668	42	0	1146	NA	14	0	0	0	3
1469	0	0.001499893	64	0	322	NA	12	0	0	0	0
1470	0	0.040857428	51	0	0.385322935	5000	9	0	1	0	0
1471	0	0.9999999	65	0	0.282883462	9335	10	0	2	1	2
1472	0	0.96673631	64	0	0.419895026	4000	8	0	2	0	0
1473	0	0.685583993	41	0	0.450440529	10895	13	0	5	0	1
1474	0	0.019999721	48	0	0.090381924	5000	11	0	1	0	0
1475	0	0.275748654	62	0	1348	NA	7	0	1	0	0
1476	0	0	60	0	0.254106556	7000	9	0	2	0	0
1477	0	0.9999999	51	0	1.123247319	8486	11	0	9	0	1
1478	0	0.004396358	80	0	0.23319682	4150	10	0	2	0	1
1479	0	0.216826619	56	1	0.854103343	3618	16	0	3	0	2
1480	0	0.205031355	39	0	0.602840353	4083	10	0	2	0	2
1481	0	0.9999999	36	0	0.082448854	6500	6	0	0	0	1
1482	0	0.555938038	53	0	0.451816271	3330	10	0	0	0	0
1483	0	0.002288418	66	0	0.000499917	6000	3	0	0	0	0
1484	0	0.088300431	35	0	3041	NA	8	0	1	0	0
1485	0	0.143187518	46	0	0.048500555	2700	3	0	0	0	0
1486	1	1.083405734	55	3	0.490218316	3526	10	0	1	1	1
1487	0	0.688665867	34	0	1.034152436	2400	12	0	1	0	3
1488	0	0.600289222	26	0	0.411100659	2125	3	0	0	0	0
1489	0	0.220222137	26	1	0.843945069	800	6	0	0	0	0
1490	0	0.030141422	52	0	0.090074333	2286	6	0	0	0	0
1491	0	0.239963423	58	0	0.195229306	7042	8	1	1	0	4
1492	0	0.443379207	42	0	1.412587413	1000	8	0	0	0	0
1493	0	0.198454901	51	0	0.246160694	4492	7	0	1	0	2
1494	0	0.439512098	66	0	0.027951606	2396	2	0	0	0	0
1495	0	0.270429421	62	0	0.477690571	9300	14	0	3	0	1
1496	0	0	87	0	0.01910828	6436	8	0	0	0	0
1497	0	0.023945636	63	0	0.032692543	8166	13	0	1	0	0
1498	0	0.570122822	30	0	0.737718568	1200	5	0	0	0	0
1499	0	0.9999999	47	0	2174	NA	1	0	1	0	NA
1500	0	0	57	0	0.324611033	4241	7	0	1	0	1
1501	0	0.128842063	37	0	0.44555542	8200	10	0	2	0	2
1502	0	0.339647837	65	0	0.265089623	8200	6	0	1	0	1
1503	0	0.014370016	69	0	0.432807679	5833	9	0	1	0	0
1504	0	0	61	0	2	NA	5	0	0	0	0
1505	0	0.511248875	38	1	0.476190476	4304	10	0	1	0	2
1506	0	0.16805774	43	0	0.313671582	4000	7	0	1	0	0
1507	0	0.005971329	54	0	0.280197575	4453	13	0	1	0	2
1508	0	0.123206192	44	0	0.643262895	4400	10	0	2	0	2
1509	0	0.003499865	48	0	0.32941435	9100	7	0	2	0	1
1510	0	0.054783369	63	0	0.099980004	5000	15	0	0	0	1
1511	0	0.041735628	46	0	0.036921329	7041	22	0	0	0	0
1512	1	0.9999999	42	0	31	NA	0	2	0	0	0
1513	0	0.386691448	41	3	0.276689324	2500	14	0	0	0	0
1514	0	0.956397524	35	2	3268	NA	15	0	1	0	0
1515	0	0.689770077	34	0	0.308230874	5855	5	0	2	1	0
1516	0	0.121532709	29	0	0.155711072	4000	4	0	0	0	0
1517	0	0.031140633	45	0	0.075146243	20000	9	0	0	0	0
1518	0	0.478720045	35	0	0.353107815	6000	7	0	1	0	0
1519	0	0.246369867	73	0	0.289518318	5895	5	0	1	0	0
1520	0	0.065788608	69	0	1234	NA	13	0	2	0	1
1521	0	0.351892829	45	0	0.563852484	3280	18	0	3	0	4
1522	0	0.430444733	53	0	0.281642229	8524	12	0	2	0	0
1523	0	0.033498604	29	0	0.450358041	5166	7	0	2	0	0
1524	0	0.072494634	74	0	0.523546435	3800	9	0	2	0	0
1525	0	0.072093448	63	1	0.673983917	4600	17	0	1	0	1
1526	0	0.418715107	35	0	0.114119117	2400	2	0	0	0	0
1527	0	0.088336591	43	0	0.216678332	10000	15	0	1	0	2
1528	0	0.457431884	42	1	0.700270556	8500	17	0	3	0	2
1529	0	0.029570959	80	0	0.048762191	1332	13	0	0	0	0
1530	0	0.168772615	58	0	0.289779829	10400	11	0	1	0	1
1531	0	0.032438862	86	0	0.141974187	5500	14	0	1	0	0
1532	0	0.9999999	28	0	0.154551135	4800	4	0	0	0	3
1533	0	0.83121405	42	0	0.105620649	17666	12	0	0	0	0
1534	0	0.063226971	59	0	0.263461966	13500	22	0	3	0	0
1535	0	0.019139302	43	0	8.007968127	250	11	0	1	0	2
1536	0	0.436410214	27	0	0.133777672	4200	5	0	0	1	0
1537	0	0.483301113	40	0	0.303013393	3583	11	0	1	0	2
1538	0	0.510293034	59	0	0.31697841	61000	13	0	2	0	1
1539	0	0.955236854	63	0	65	NA	1	0	0	0	2
1540	0	0.070741157	65	0	0.146763902	2193	5	0	0	0	0
1541	0	0.056334303	63	0	4542	NA	12	0	3	0	0
1542	0	0.55986436	63	0	0.589572193	2243	6	0	1	0	0
1543	0	0	30	0	0.149209191	3350	10	0	0	0	0
1544	0	0.200990429	45	0	1559	NA	5	0	1	0	0
1545	0	0.093446262	80	0	0.123590725	4700	14	0	0	0	0
1546	0	0.098019024	55	0	0.025917927	4166	7	0	0	0	1
1547	0	0.135407518	61	0	0.343653846	5199	12	0	1	0	0
1548	0	0.9999999	83	0	0	9704	4	0	0	0	0
1549	0	0.198673754	44	0	2.699720112	2500	13	0	3	0	0
1550	0	0.905468868	31	1	0.35297212	1900	6	0	0	2	0
1551	0	0.011986243	77	0	0.010284245	7000	21	0	0	0	0
1552	0	0.31309339	57	0	1.64846981	2417	8	0	1	0	0
1553	0	0.12724513	46	0	0.643	14999	11	0	5	0	0
1554	0	0	42	0	0.108598726	12559	5	0	1	0	3
1555	0	0.029725902	67	0	685	NA	8	0	0	0	0
1556	0	0.312571479	33	0	0.107851172	6100	5	0	0	0	0
1557	0	0	34	0	0.062897655	5500	2	0	0	0	0
1558	0	0.809738087	49	0	0.196738963	6500	5	0	0	0	2
1559	0	0.085108409	54	0	0.160825176	9500	7	0	1	0	1
1560	0	0.973447395	42	0	0.468198992	3175	9	0	1	0	0
1561	0	0.933834167	57	2	6696	NA	8	0	2	0	0
1562	0	0.041826362	58	0	2707	NA	4	0	1	0	2
1563	0	0.639081992	48	0	0.362545818	3000	5	1	1	0	1
1564	0	0.100835967	87	0	140	NA	6	0	0	0	0
1565	0	0.06839772	86	0	60	NA	7	0	0	0	0
1566	0	0.019376663	68	0	1277	NA	12	0	1	0	NA
1567	0	0	88	1	0	9265	7	0	0	0	0
1568	0	0.05968851	76	0	0.282181539	10432	20	0	2	0	0
1569	0	0.027999026	70	0	24	NA	8	0	0	0	0
1570	0	0.085783584	72	0	0.16900596	5200	12	0	0	0	1
1571	0	0.132240176	59	0	0.549862534	4000	9	0	1	0	0
1572	0	0.085633991	49	0	0.227886057	2000	14	0	0	0	0
1573	0	0.924107143	24	0	0.135388461	4800	7	0	0	0	2
1574	0	0.009495252	56	0	0.055031668	7104	2	0	0	0	1
1575	0	0.952798882	54	0	0.558740602	6383	10	0	1	0	1
1576	0	5.37E-05	41	0	0.108461814	5577	7	0	0	0	1
1577	0	0.655147395	46	0	0.378128675	5952	6	0	1	0	3
1578	0	0.329152121	41	0	0.534155364	4054	8	0	2	0	1
1579	0	0.017050203	64	0	0.583655513	7500	19	0	4	0	0
1580	0	0.9999999	30	1	0.154187958	4500	4	0	0	1	0
1581	1	0.602746575	42	0	0.260608705	9166	4	0	0	0	1
1582	0	0.004769675	89	0	0.000572902	3490	9	0	0	0	0
1583	0	0.034247393	43	0	0.159026599	5300	10	0	1	0	1
1584	0	0.170115934	63	0	0.208084051	6852	20	0	1	0	0
1585	0	0.310076467	37	0	0.255326195	9058	7	0	1	0	0
1586	0	0.999578992	55	4	0.148483601	7286	6	0	0	0	0
1587	0	0	26	0	0	2400	2	0	0	0	0
1588	0	0.380480301	68	0	0.051771117	2568	2	0	0	0	3
1589	0	0.187409279	38	0	0.49730054	5000	7	0	1	0	2
1590	0	0.68012303	48	0	245	NA	4	0	0	0	0
1591	0	0	26	0	0.337244676	2300	4	1	1	0	0
1592	0	0.273435385	48	0	0.218109655	10833	10	0	1	0	0
1593	0	0.284951627	52	0	0.380131887	4700	9	0	1	0	0
1594	0	0.336222047	44	0	0.234941265	4000	14	0	0	0	0
1595	0	0.030024681	61	0	0.852235551	1833	5	0	1	0	0
1596	0	0.008247756	66	0	0.943611278	5000	7	0	2	0	0
1597	0	0.137528803	42	0	0.504559635	8333	13	0	2	0	3
1598	0	0.54691406	67	0	2969	NA	6	0	2	0	0
1599	0	0.132249033	49	0	29	NA	2	0	0	0	NA
1600	1	0.9999999	35	1	0.900911497	3400	6	0	2	0	0
1601	0	0	53	2	2658	NA	7	0	1	0	0
1602	0	0.205274463	51	0	0.361329834	8000	10	0	1	0	0
1603	0	0	49	1	0.544228523	9416	11	0	3	0	2
1604	0	0.464195875	53	0	0.120938628	4985	8	0	0	0	0
1605	0	0.466768944	58	0	0.327109783	4016	8	0	1	0	0
1606	0	0.911540163	46	0	3353	NA	7	0	1	0	1
1607	0	0.014088028	51	0	0.007997715	3500	6	0	0	0	1
1608	0	0.536461805	45	1	0.142285905	3000	3	2	0	0	1
1609	0	0.918342055	33	0	0.270289344	2833	4	1	0	2	0
1610	0	0	51	0	2391	NA	10	0	2	0	0
1611	0	0.023224944	64	0	0.391854139	6800	18	0	4	0	3
1612	0	0.016128599	60	0	1812	NA	8	0	1	1	0
1613	0	1.034893879	39	0	0.439362795	9729	10	0	1	0	3
1614	0	0.147242638	85	0	88	NA	3	0	0	0	0
1615	1	0.983338887	27	0	0.106808245	1600	9	0	0	0	0
1616	0	0.839907542	29	0	364	2	8	0	0	0	0
1617	0	0.286009847	65	0	3622	NA	5	0	1	0	0
1618	0	0.267368644	50	0	0.420291743	23033	46	0	6	0	0
1619	0	0.28369669	61	0	0.61966257	4800	14	0	1	0	0
1620	0	0	26	1	0	0	2	0	0	0	0
1621	0	0.143931853	61	0	0.222951896	6090	9	0	1	0	0
1622	0	0.041104587	28	0	0.3041988	3500	8	0	0	0	0
1623	0	0.299417878	56	0	0.65971575	8583	11	0	2	0	0
1624	0	0	49	0	0.355376308	15000	12	0	2	0	3
1625	0	0.000428551	88	0	0.004481434	3123	5	0	0	0	0
1626	0	0.004505221	39	0	0.435848607	4200	6	0	2	0	2
1627	0	0.492643999	55	2	0.827377113	7750	13	0	2	0	0
1628	0	0.021547106	56	0	0.318019519	4200	12	0	2	0	2
1629	0	0.100173377	44	0	0.165314965	9000	9	0	1	0	2
1630	0	0.621007856	64	0	0.310222339	7600	14	1	2	0	1
1631	0	0.028752917	72	0	0.18566124	3500	21	0	1	0	0
1632	0	0.002681757	51	0	0.732788003	4400	13	0	2	0	2
1633	0	0.498488961	39	0	0.286938021	17860	13	0	1	0	0
1634	0	0.095340549	56	0	2779	NA	14	0	3	0	3
1635	0	0.097217141	43	0	0.276211189	13333	5	0	1	0	2
1636	0	0.447466239	44	0	0.443923077	12999	8	0	2	0	2
1637	0	0.045759314	41	0	0.409914601	4800	17	0	2	0	2
1638	0	0	41	0	0.00419958	10000	7	0	0	0	0
1639	0	0.360688717	70	0	0.595462092	1806	7	0	0	0	0
1640	0	0.726088978	36	2	0.137081955	2720	4	2	0	1	2
1641	0	0.129547536	53	0	0.562443192	5500	17	0	1	0	2
1642	0	0.123218186	47	0	0.750680787	9914	11	0	2	0	5
1643	0	0.033214349	66	0	1784	NA	5	0	2	0	0
1644	0	0.010893096	71	0	0.194158076	4073	8	1	0	0	0
1645	0	0.769773734	53	0	0.278075992	9500	12	0	2	0	1
1646	0	0.006654485	50	0	740	NA	7	0	1	0	4
1647	0	0	69	0	0	NA	4	0	0	0	0
1648	0	0.175604436	28	0	28	NA	2	0	0	0	NA
1649	1	0.922505535	45	0	0.501614046	12700	11	0	4	0	1
1650	0	0.455154587	49	1	0.913286004	1971	11	0	0	0	0
1651	0	0.654650704	33	0	0.481544577	7043	11	0	2	0	1
1652	0	0.84490946	60	0	0.357151076	8690	6	0	1	0	2
1653	0	0.9999999	34	0	0.357756601	6400	6	0	2	0	0
1654	0	0.033983551	34	0	0.243744128	11708	14	0	2	0	0
1655	0	0	44	0	0.183349121	9500	11	0	1	0	2
1656	0	0.024378631	52	0	0.150484952	10000	4	0	1	0	3
1657	0	0.770867868	49	0	0.24042455	6500	8	0	0	0	0
1658	0	0	71	0	0.233691577	4000	6	0	1	0	2
1659	0	0	46	0	0.149445764	5051	3	0	1	0	0
1660	0	0.337735888	48	1	3005	NA	11	0	1	0	2
1661	0	0.026621989	62	0	0.290083632	4184	8	0	1	0	2
1662	0	0.880186636	41	0	0.211888395	2472	10	0	0	0	0
1663	1	0.9999999	50	1	1305	NA	2	0	1	0	0
1664	0	0.115814589	37	1	0.067859022	1900	4	0	0	0	0
1665	0	0.99200034	57	0	0.555111222	4000	8	0	1	0	0
1666	0	0.212526282	43	1	0.206479352	10000	8	0	2	0	0
1667	0	1.708044916	47	0	1.862758161	1500	6	0	1	0	0
1668	0	0.132463863	44	0	0.120768229	3071	11	0	0	0	1
1669	0	0.456585044	32	0	0.630046584	2575	9	0	2	0	0
1670	0	0.9999999	29	0	0	NA	0	0	0	0	0
1671	0	0.558873832	30	0	0.214595135	3000	9	0	0	0	0
1672	0	0.093454384	43	0	3986	NA	25	0	2	0	0
1673	0	0.850299401	41	0	1845	NA	3	0	0	0	0
1674	0	0.102222373	32	0	0.716513395	2500	6	0	1	0	0
1675	0	0	52	0	0.360159658	10772	10	0	1	0	4
1676	0	0.883293947	36	0	0.3118458	7833	7	0	1	0	0
1677	0	0	34	0	0.36540709	2566	3	0	0	0	0
1678	0	0.03839346	76	0	0.01371298	10500	11	0	0	0	0
1679	0	0.903123346	47	0	0.342544069	8395	8	0	2	0	0
1680	0	0.496968813	39	1	0.15199392	25000	11	0	2	0	3
1681	0	0.940774925	41	2	0.381154711	4000	10	0	1	0	1
1682	0	0.9999999	35	0	0.007617597	5250	1	0	0	0	0
1683	0	1.025987006	63	6	0.521441726	3800	8	2	2	1	1
1684	0	0.071129391	80	0	0.093687518	3500	6	0	0	0	0
1685	0	0	40	0	509	NA	3	0	0	0	0
1686	0	0.01150123	43	0	0.418702196	4052	4	0	1	0	0
1687	0	0	60	0	114	NA	7	0	0	0	0
1688	0	0.425597312	43	0	0.302766085	3325	4	0	1	1	0
1689	0	0.087452779	71	0	1959	NA	11	0	1	0	2
1690	0	0	44	0	0.431305341	3500	4	0	1	0	2
1691	0	0.630787623	67	0	0.37942033	7210	12	0	2	0	0
1692	0	0.0049619	74	1	8	NA	9	0	0	0	0
1693	0	0.016861692	48	0	0.425821711	12260	12	0	5	0	4
1694	0	0.195056302	73	0	1529	NA	10	0	1	0	2
1695	0	0.231831982	44	0	0.192690243	12667	6	0	1	0	2
1696	0	0.306338732	57	0	0.376373626	6915	12	0	3	0	2
1697	0	0.9999999	49	0	2883	0	9	0	2	0	1
1698	0	0.328573722	66	1	0.293398759	10800	17	0	2	0	1
1699	0	0.818659658	58	0	1.042791442	5000	11	0	2	0	0
1700	0	0.24664436	45	0	0.10996858	3500	5	0	0	0	1
1701	0	0.084138627	67	1	1295	NA	10	1	2	0	3
1702	0	0.01029897	29	0	0.00119952	2500	1	0	0	0	0
1703	0	0.090361993	77	0	0.311583578	4091	7	0	1	0	0
1704	0	0.568392168	35	0	0.903676471	2719	9	0	1	0	0
1705	0	0.005451823	59	0	0.00119976	5000	7	0	0	0	0
1706	0	0.043255885	33	1	0.009998276	5800	7	0	0	0	0
1707	0	0.001925099	70	0	0.024569089	10500	15	0	0	0	0
1708	0	1.006955514	66	0	0.214392804	2000	3	0	0	0	0
1709	0	0.056371415	44	0	0.359768292	14500	10	0	2	0	1
1710	0	0.00789921	72	0	508	NA	5	0	1	0	0
1711	0	0	29	0	1394	NA	5	0	1	0	0
1712	0	0.982431974	59	5	0.664255618	14239	13	0	2	1	2
1713	0	0.018265099	55	0	0.012643379	7671	6	0	1	0	0
1714	1	0.9999999	52	0	0.237812128	6727	2	4	0	1	1
1715	0	0.342056982	70	0	0.626394732	10933	13	0	3	0	0
1716	0	0.039016915	67	0	0.499126383	1716	5	0	0	0	0
1717	0	0.296110304	30	0	0.205498473	3600	3	0	0	0	1
1718	0	0.0445764	61	0	37.5	1	4	0	0	0	0
1719	0	0.000349991	73	0	681	NA	6	0	1	0	0
1720	0	0	25	0	0.633373934	820	3	0	0	0	0
1721	0	0.003574848	70	0	0.410062479	6081	15	0	1	0	0
1722	0	0.186851783	62	0	0.286681021	9752	8	0	1	0	0
1723	0	0.032998429	30	0	0.004461298	4482	1	0	0	0	0
1724	0	0.006922189	68	0	1	NA	9	0	0	0	0
1725	0	0.474681259	43	0	0.196592119	4694	6	0	0	0	1
1726	0	0.356634904	49	1	0.458135466	4000	11	0	2	0	0
1727	0	0.982403519	57	0	2357	NA	8	0	1	1	0
1728	0	0.036347783	49	0	0.180969958	9752	11	0	0	0	1
1729	0	0.258431665	70	0	4045	NA	8	0	1	0	1
1730	0	0	36	4	0.437849944	6250	11	0	2	1	0
1731	1	0.537417139	38	1	2748	NA	5	3	1	3	0
1732	0	0.369472183	21	0	7	NA	1	0	0	0	0
1733	0	0.04254138	35	0	0.486238532	9700	12	0	3	0	2
1734	1	0.9999999	27	98	0	2700	0	98	0	98	0
1735	0	0.096565911	40	0	0.120809423	3310	4	0	0	0	1
1736	0	0.295740852	47	0	0.178619035	3750	3	0	0	0	2
1737	0	0.213785748	46	0	0.367816092	2000	5	0	1	0	0
1738	0	0.339794165	59	0	3115	NA	19	0	1	0	0
1739	0	0.318112126	60	0	0.020152792	7591	2	0	0	0	0
1740	0	0.600066364	53	1	0.50857819	5070	15	0	1	0	1
1741	0	0.044177962	31	0	0.33847981	5893	9	0	1	0	1
1742	0	0.010092554	37	0	0.003128259	1917	3	0	0	0	0
1743	0	0.510087113	61	0	0.198656111	15030	6	0	1	0	1
1744	0	0.039753447	66	0	0.243919633	2836	15	0	0	0	0
1745	0	0.05101939	59	0	0.26045568	12815	16	0	1	0	3
1746	0	0.9999999	63	5	0.194618671	11000	7	0	2	0	0
1747	0	0.142398	57	0	0.264079508	4225	6	0	1	0	0
1748	0	0.9999999	63	0	0	1	2	0	0	0	0
1749	0	0.006796192	77	0	0.41393079	2253	13	0	1	0	0
1750	0	0.132962653	61	0	0.371699564	3900	10	0	1	0	3
1751	0	0.827200631	53	0	0.505687694	2900	8	0	3	0	0
1752	0	0.022417562	72	0	0.001825769	7667	2	0	0	0	0
1753	0	0.2391771	72	0	1.054041983	6716	9	0	2	0	1
1754	0	0.30428262	32	0	0.274722886	4600	8	0	1	0	0
1755	0	0.514708735	35	0	0.91878384	2400	18	0	1	0	1
1756	0	0.344317885	27	0	0.17953362	4416	8	0	0	0	0
1757	0	0.022438565	81	0	0.230679837	3441	8	0	1	0	0
1758	0	0.029431333	70	0	0.578070322	6000	12	0	3	0	0
1759	0	0.017832739	38	0	0.003870718	5166	4	0	0	0	1
1760	0	0.006838698	43	0	0.527266028	2713	7	0	1	0	1
1761	0	0.056476222	59	0	3612	NA	7	0	2	0	0
1762	0	0.000171917	71	0	0	30000	8	0	0	0	0
1763	0	0.056895398	64	0	0.335904688	11666	14	0	3	0	0
1764	0	0.9999999	39	3	0.112225335	6780	5	0	0	0	0
1765	0	0.212426252	36	0	2743	NA	8	0	1	0	0
1766	0	0.01239876	66	0	14.01876676	372	3	0	2	0	0
1767	1	0.197701607	55	1	0.258874113	10000	7	0	2	1	1
1768	0	1.624465065	61	0	0.432814229	11750	12	0	1	0	1
1769	0	0.03473748	67	0	1969	NA	10	0	2	0	0
1770	0	0.108894555	58	1	65	NA	2	0	0	0	0
1771	1	0.768820786	25	1	0.569584736	1781	6	0	0	0	0
1772	0	0.705197204	56	0	0.262722496	55000	16	0	6	0	1
1773	0	0.987367106	56	0	0.613832059	14516	21	0	2	1	0
1774	0	0	63	1	0.087569008	5252	5	0	1	0	1
1775	0	0.122047134	58	0	1.861569215	2000	14	0	1	0	0
1776	0	0.39159148	45	0	1363	NA	7	0	3	0	0
1777	0	0.884176675	32	0	0.709526982	1500	6	0	0	0	0
1778	0	0.332944509	38	0	0.004916257	12000	3	0	0	0	1
1779	0	0.017699115	78	0	10	NA	1	0	0	0	NA
1780	0	0.366062091	77	0	0.559043159	7900	12	0	1	0	0
1781	0	0.9999999	32	0	0.566289141	1500	4	0	0	0	0
1782	0	0.059627208	63	0	639	NA	6	0	0	0	1
1783	0	0.061397627	41	0	0.718473935	10300	18	0	3	0	4
1784	0	0.162218632	49	0	0.459160129	4333	9	0	2	0	1
1785	0	0.030829821	48	1	0.088447653	1107	3	0	0	0	2
1786	0	0.005660923	42	0	0.001606856	5600	1	0	0	0	1
1787	0	0.04550585	58	0	0.00979804	5000	5	0	0	0	1
1788	0	0.135778145	46	0	0.325581395	6750	13	0	1	0	1
1789	0	0.047724174	66	0	0.75812094	2000	11	0	1	0	1
1790	1	0.9999999	70	1	520	NA	3	0	1	1	0
1791	0	0	52	0	0.163458647	6649	3	0	1	0	2
1792	0	0.9999999	31	1	813	NA	4	2	0	1	0
1793	0	0.017796441	92	0	2	NA	2	0	0	0	NA
1794	0	0.267703359	49	0	0.021265054	9216	4	0	0	0	1
1795	0	0.714013618	55	0	0.252201164	6700	4	0	0	1	0
1796	0	0.947700354	39	1	0.048520395	3750	8	0	0	0	0
1797	1	0.978808477	47	1	0.428419088	3750	5	4	0	0	1
1798	1	1.050951924	61	3	0.801221544	1800	7	3	2	0	0
1799	0	0.959005856	30	0	0.213268706	3300	5	0	0	0	0
1800	0	0.098515058	72	0	1189	0	4	0	1	0	0
1801	1	0.9999999	39	0	0.041420118	3041	2	1	0	0	3
1802	0	0.000642385	53	0	1959	NA	6	0	1	0	NA
1803	0	0.407186096	46	0	0.512998	6500	14	0	3	0	2
1804	1	0.9999999	79	0	190	NA	0	0	0	0	0
1805	0	0.086672375	79	0	0.134648714	7500	15	0	0	0	0
1806	0	0.02365588	70	0	0.01793722	2452	7	0	0	0	0
1807	0	0.911663333	37	0	0.632308212	5917	11	0	2	0	3
1808	0	0.215568862	51	0	0.069114471	4166	3	0	0	0	3
1809	0	0.088046633	63	0	0.157283194	9466	5	0	1	0	0
1810	0	0.059112597	59	0	1743	NA	3	0	1	0	NA
1811	0	0.032966889	48	0	0.537307906	5400	10	0	2	0	1
1812	0	0.042970201	40	0	45	0	6	0	0	0	0
1813	0	0.026599391	62	0	0.074071225	13000	9	0	1	0	1
1814	0	0.247103146	63	0	0.382146601	12400	22	0	3	0	1
1815	0	0.021639523	56	0	0.323073492	8966	21	0	2	0	2
1816	0	0.064372318	41	0	1.083273338	4166	7	0	1	0	1
1817	0	0.011845698	76	0	9	NA	3	0	0	0	0
1818	0	0.342435003	55	0	3840	NA	5	0	2	0	0
1819	0	0.106507141	40	0	0.173443541	7500	13	1	2	0	1
1820	0	0.849229165	60	0	0.848819169	5800	11	0	2	0	0
1821	0	0.350847689	47	0	0.43258377	11250	9	0	2	0	3
1822	0	0.284029179	42	0	1623	NA	10	0	1	0	0
1823	0	0.909043376	42	0	0.422447194	8000	11	0	2	0	0
1824	0	0.013626303	76	0	0.09737293	3501	10	0	0	0	0
1825	0	0.205385796	68	0	1694	NA	11	0	1	0	0
1826	0	0.006161492	41	0	0.001079914	8333	3	0	0	0	0
1827	1	0.9999999	64	1	0.967923863	2836	6	0	1	0	2
1828	0	0.167835331	37	0	0.716118685	3740	20	0	2	0	1
1829	0	0.162704663	36	0	0.043175147	8175	9	0	0	0	4
1830	0	0.028592856	33	1	0.191657272	2660	8	0	0	0	0
1831	0	0.9999999	31	0	0	1200	0	0	0	0	0
1832	0	0.536349341	48	0	0.14775359	4317	6	0	0	0	2
1833	0	0.026159198	74	0	41	NA	3	0	0	0	0
1834	0	0.009937069	76	0	0.327737096	5598	16	0	2	0	0
1835	0	0.020739585	78	0	374	NA	3	0	0	0	1
1836	0	0.371644487	32	0	0.427944404	4100	13	0	0	1	2
1837	0	0.9999999	42	0	0.082983403	5000	1	1	0	0	2
1838	0	0.032233653	70	0	142	NA	6	0	1	0	0
1839	1	0.924601885	43	1	0.367097806	6880	4	0	0	0	1
1840	0	0.2505186	77	0	0.363636364	4300	24	0	0	0	0
1841	0	0.001128491	81	1	4546	NA	13	0	5	0	0
1842	0	0.01783591	80	0	1062	NA	13	0	2	0	0
1843	0	0.038488034	42	0	1.225011008	2270	10	0	2	0	2
1844	0	0.680631937	33	0	0.057983433	3500	4	0	0	0	3
1845	0	0.101810554	36	0	0.816436713	5000	6	0	2	0	2
1846	1	0.9999999	55	0	0.025398541	3700	1	2	0	1	0
1847	0	0.435904273	43	0	0.353206239	5769	5	0	1	0	0
1848	0	0.519302673	40	0	0.765896315	8004	12	0	3	0	0
1849	0	0.293554293	63	0	0.282177432	6300	8	0	1	0	0
1850	0	0.203916305	57	0	0.346379089	7000	8	0	1	0	1
1851	0	0.9999999	32	0	0.096394145	2800	1	0	0	0	1
1852	0	0.179849103	45	0	0.308615311	4166	7	0	2	0	0
1853	0	0	60	0	0.203310743	9000	7	0	2	0	1
1854	0	0.263407239	60	0	2300	NA	21	0	1	0	0
1855	0	0.013174641	41	0	0.121859768	8000	8	0	0	0	2
1856	0	0.180280146	47	0	0.02849715	10000	4	0	0	0	5
1857	0	0.101740388	64	0	0.361220731	3800	9	0	1	0	0
1858	0	1.209302326	49	0	10	NA	1	0	0	0	0
1859	0	0.617672488	44	1	0.14130275	6800	8	0	0	0	2
1860	0	0.011140155	83	0	18	NA	3	0	0	0	0
1861	0	0.9999999	45	0	0	4000	3	0	0	0	4
1862	1	0.955200471	44	0	2277	NA	10	0	1	0	0
1863	0	0.038950934	69	0	0.179793912	8442	15	0	2	0	0
1864	0	0.006341611	61	0	0.423549278	6513	19	0	3	0	1
1865	0	0.655344655	35	0	0.294355859	3950	6	0	0	0	2
1866	0	0.494343504	51	0	0.692561488	3333	6	0	1	0	0
1867	1	1.000782541	49	1	0.642629905	6600	9	0	1	1	0
1868	0	0.105556349	45	0	0.222071349	8100	5	0	2	0	2
1869	0	0.208583325	50	0	0.050887927	6700	10	1	0	0	1
1870	0	0.136793641	92	1	0.235086836	3972	11	0	1	0	1
1871	0	0.169233231	47	0	0.228154369	5000	6	0	1	0	2
1872	1	0.9999999	46	0	117	NA	2	0	0	0	0
1873	0	0.441343163	45	0	1.404297851	2000	15	0	1	0	0
1874	0	0.071486036	53	0	0.182433958	8857	3	0	2	0	1
1875	0	0.007318071	64	0	419	NA	7	0	0	0	0
1876	0	0.026048127	49	0	0.322921627	10500	24	0	3	0	0
1877	0	0.508254824	47	0	0.58369593	7813	9	0	1	0	1
1878	1	0.9999999	41	0	0.492424242	5147	5	1	1	0	1
1879	0	0.280334483	34	0	0.558411882	3500	10	0	1	0	0
1880	0	0.014083737	67	0	0.129409265	4705	7	0	1	0	0
1881	0	0.508008865	49	1	0.360940809	8970	10	0	2	0	4
1882	0	0.000115738	60	0	0.008918316	14800	5	0	0	0	1
1883	0	0.075929766	40	0	87	NA	9	0	0	0	0
1884	0	0	28	0	586	NA	11	0	0	0	NA
1885	0	0.846163759	47	0	0.571108043	5793	12	0	1	0	0
1886	0	0.010646433	32	0	0.000830979	6016	8	0	0	0	2
1887	0	0.03167801	28	0	0.114237715	2380	7	0	0	0	0
1888	0	0.155959085	41	0	2599	0	5	0	1	0	0
1889	0	0.9999999	62	0	0.03263928	1776	1	1	0	0	0
1890	0	0.281677722	32	0	0.400887929	8333	7	0	1	0	4
1891	0	0.9999999	24	0	602	NA	0	0	0	0	0
1892	0	0.358290304	71	0	1342	NA	4	0	1	0	0
1893	0	0.081071193	44	0	0.332041747	16000	9	0	4	0	3
1894	0	0.006631879	27	0	0.186841149	2750	6	0	0	0	0
1895	0	0.197212966	49	1	0.196000987	4050	6	0	1	2	0
1896	0	0.412840416	33	0	853	NA	9	0	0	0	2
1897	0	0.054562307	67	0	91	NA	4	0	0	0	NA
1898	0	0	48	0	0	NA	2	0	0	0	0
1899	0	0.049889802	44	1	2549	NA	6	0	1	0	0
1900	0	0.556591981	45	0	1.409716125	6833	22	0	8	0	0
1901	0	0.9999999	30	0	0	NA	0	1	0	0	0
1902	0	0.906381727	50	0	5317	NA	16	0	2	0	2
1903	0	0.59410642	42	0	0.838448253	7526	14	0	4	0	2
1904	0	0.03382955	58	0	0.177037996	8500	10	0	2	0	0
1905	0	0.041396982	64	0	0.018495376	4000	5	0	0	0	1
1906	0	0.046458026	64	0	0.133116883	7083	9	0	0	0	0
1907	0	0.033934804	57	0	5354	NA	9	0	2	0	4
1908	0	0.103659756	29	0	0.195398574	3085	5	0	0	0	0
1909	0	0.9999999	53	0	0.1026737	10995	7	0	0	0	2
1910	1	0.9999999	30	0	0	2900	3	0	0	0	1
1911	0	0.151567098	61	0	0.52310231	8483	3	0	1	0	0
1912	1	0.680161943	47	4	0.378735696	9000	7	0	1	0	2
1913	0	0.9999999	55	0	0.958208358	5000	8	0	3	0	0
1914	0	0.060876125	67	0	0.122324159	5885	10	0	0	0	2
1915	0	0.9999999	24	0	0.176025918	925	1	0	0	0	0
1916	0	0.672442519	85	2	0.020381451	5347	7	1	0	1	0
1917	0	0.389287936	63	0	1633	NA	9	0	1	0	0
1918	0	0.376297369	55	0	1663	NA	5	0	1	0	0
1919	0	0	35	0	0.195701075	4000	9	0	0	0	4
1920	0	0.288158053	38	0	0.494088583	5666	5	0	2	0	1
1921	0	0.484136932	46	0	0.144113613	12392	7	0	1	0	0
1922	0	0.084647226	70	0	0.224233283	5966	4	0	1	0	0
1923	0	0.703167083	55	0	0.174802291	11000	12	0	0	0	0
1924	0	0.076419464	44	0	4200	NA	23	0	3	0	3
1925	0	0.017639294	89	0	0.007223476	2214	6	0	0	0	0
1926	0	0.00857712	49	0	0.142343063	2500	10	0	0	0	0
1927	0	0.806522776	27	0	0.514185727	8000	11	0	0	0	0
1928	0	0.009386388	71	0	0.010705922	2988	12	0	0	0	0
1929	0	0.86234251	34	0	0.370256803	5217	6	0	1	1	2
1930	0	0.665173572	54	0	0.166102842	2955	3	0	0	0	0
1931	0	0.007230398	54	0	705	NA	4	0	2	0	0
1932	0	0.02579742	75	0	0.005178402	15834	2	0	0	0	1
1933	0	0.223677632	35	0	0.375291634	9000	7	0	1	0	0
1934	0	0	42	0	0	5000	2	0	0	0	0
1935	0	0.242501363	27	0	40	NA	1	0	0	0	NA
1936	0	0.838060769	65	2	0.568128183	8050	15	0	1	0	0
1937	0	0.10192376	63	0	0.327049414	3500	7	0	1	0	1
1938	0	0.10189678	24	0	0.017257039	1100	7	0	0	0	0
1939	0	0.891623721	37	0	0.564257446	4800	8	0	1	0	1
1940	0	0.786357071	44	0	0.066129456	11416	7	0	0	0	0
1941	0	0.936690115	50	1	1660	NA	7	0	1	0	0
1942	0	0.339485947	31	0	0.514124842	10300	15	0	2	0	0
1943	0	0.611393314	51	0	0.401873049	9609	14	0	2	0	0
1944	0	0.151847413	56	1	0.291383601	14866	15	0	1	0	1
1945	0	0.00729301	58	0	0.470048177	11000	10	0	1	0	0
1946	0	0.036631719	61	0	1102	NA	6	0	1	0	NA
1947	0	0.004538163	82	0	0.002220577	2701	4	0	0	0	1
1948	0	0.027560119	78	0	9	NA	3	0	0	0	NA
1949	0	0.615059839	47	0	2.777496839	790	7	0	0	0	0
1950	0	0.239984263	33	0	0.553889222	5000	6	0	1	0	1
1951	0	0.071618037	70	0	1557	NA	18	0	1	0	0
1952	0	0.239735812	45	0	0.73225917	5833	9	0	1	0	0
1953	0	0.087409383	39	0	0.389115063	4666	6	0	2	0	1
1954	0	0.291790743	37	0	4729	NA	6	0	2	0	0
1955	0	0.02374947	59	0	0.090883991	21730	8	0	1	0	0
1956	1	1.022703603	44	2	0.200471991	8050	6	2	0	2	1
1957	0	0.822859221	37	0	637	NA	2	0	0	0	0
1958	1	0.9999999	36	0	2730	NA	2	0	2	0	0
1959	0	1.634551495	28	0	151	NA	1	3	0	2	0
1960	0	0.007329357	68	0	0.145237897	12000	20	0	1	0	0
1961	0	0.9999999	46	0	0.001142694	7000	0	0	0	0	3
1962	0	0	60	0	0.624692034	3652	9	0	2	0	0
1963	0	0.537109258	56	0	1.065304309	2250	3	0	1	0	0
1964	0	0.319447649	55	1	0.133364098	2166	6	0	0	0	1
1965	0	0.073916921	44	0	0.1828594	7595	8	0	1	0	0
1966	0	0.068063285	52	0	0.226804124	3200	12	0	2	0	0
1967	0	0.335712013	41	0	0.648859731	3200	3	0	2	0	0
1968	0	0.504430534	25	0	0.188216476	3750	13	0	0	0	0
1969	0	0.271030817	49	0	3.214642263	600	12	0	2	0	2
1970	0	0.047647618	73	0	639	NA	5	0	1	0	0
1971	0	0.159244895	50	0	0.410598234	6000	5	0	1	0	0
1972	0	0.741639022	55	1	0.652793401	8000	7	0	1	0	0
1973	0	0.456195677	65	0	0.395201599	3000	6	0	0	0	0
1974	0	0.004570993	28	0	0.008594983	5700	4	0	0	0	0
1975	0	0.152989801	65	0	704	NA	4	0	1	0	0
1976	0	0.373342184	48	2	3.45243805	1250	27	0	2	0	2
1977	0	0.371401036	29	0	0.459297344	3500	8	0	1	0	2
1978	1	0.966777409	40	2	0.90261115	2833	5	3	1	1	2
1979	0	0.978733534	32	1	1.110963012	3000	16	0	1	0	0
1980	1	0.909494725	23	0	0.149140344	2500	8	0	0	0	0
1981	0	0.016422761	83	0	0.005982292	4178	8	0	0	0	0
1982	0	0.16536001	71	0	0.349833333	5999	11	0	2	0	0
1983	0	0.683331804	48	1	2349	NA	9	0	2	0	0
1984	0	0	78	0	0.6885414	3900	8	0	1	0	0
1985	0	0.188387441	56	0	0.078538927	16042	3	0	1	0	3
1986	0	0.904559865	36	0	0.358805885	7000	15	0	0	0	1
1987	0	0	24	0	0	3100	1	0	0	0	0
1988	0	0.024624807	50	0	0.197565025	7227	6	0	1	0	0
1989	0	0	81	0	0	NA	4	0	0	0	0
1990	0	0.012535778	67	0	1876	NA	12	0	1	0	0
1991	0	0.161527545	77	0	0.073167863	8500	3	0	0	0	1
1992	1	1143	44	2	0.547761883	6500	13	0	4	0	2
1993	0	0.279617729	59	2	0.15028584	9095	6	0	1	0	1
1994	0	0.037579433	68	0	1934	NA	6	0	1	0	0
1995	0	0.003573653	60	0	2	NA	5	0	0	0	0
1996	0	0.343657564	58	2	0.316710411	8000	14	0	1	0	0
1997	0	0.9999999	23	0	0.117033604	862	1	0	0	0	0
1998	0	0.442308844	43	0	0.063498247	5133	4	0	0	1	1
1999	0	0.004222228	77	0	0.002671416	1122	5	0	0	0	0
[truncated: 148,001 more rows]
